# Supplementary material for: Human thymic epithelial primary cells produce exosomes carrying tissue-restricted antigens
Source: PubMed Central journal article supplement — Immunol Cell Biol. 2015 Mar 17;93(8):727–34. doi: 10.1038/icb.2015.33 (PMC4575951; doi:10.1038/icb.2015.33), 2015-03-17
Supplement: icb201533x1.pdf [file icb201533x1.pdf]

# Supplemental figure (1)

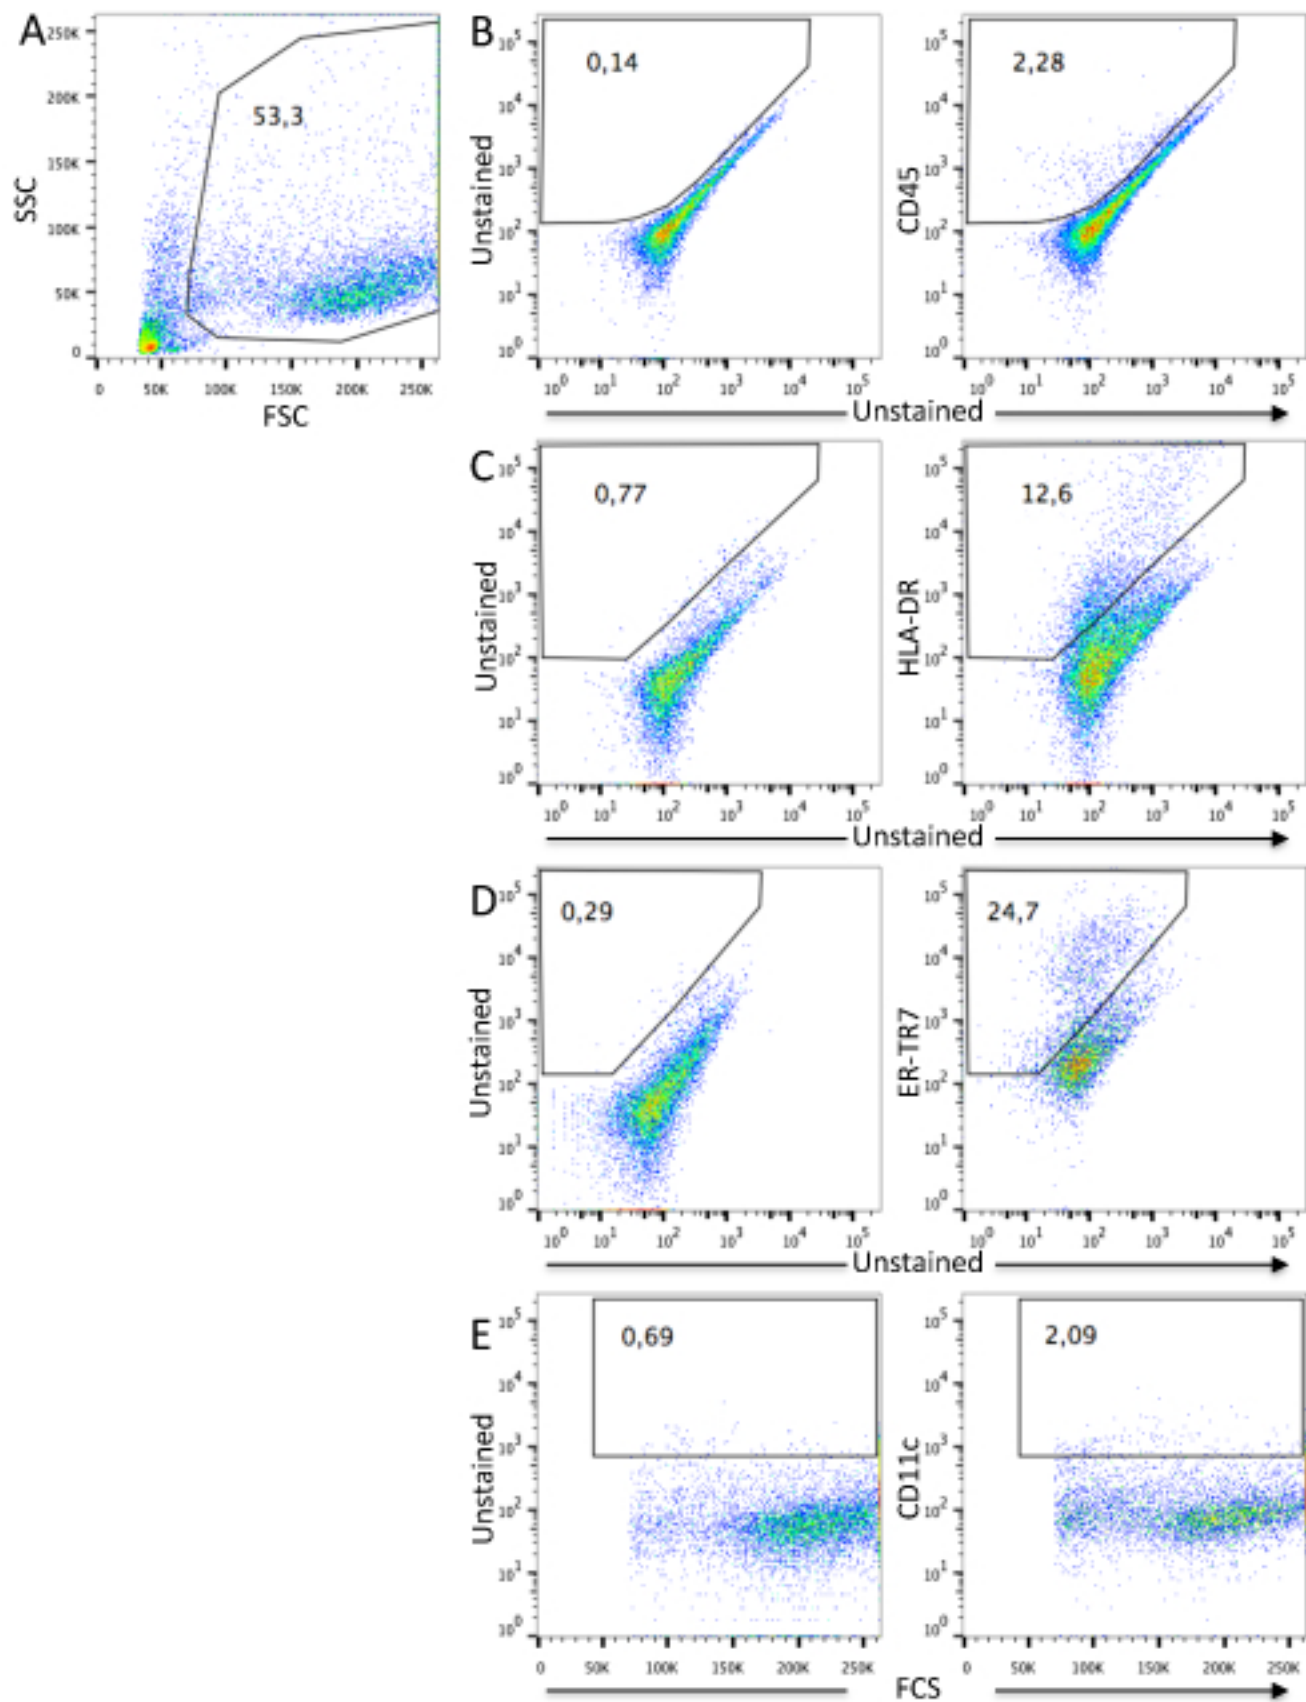

## Supplemental Figure S1 Legend

**Figure S1. Characterization of cultured TECs by flow cytometry.** Thymic tissue was prepared and cultured as described in the materials and methods section. At culture day seven, adherent cells were detached by enzymatic treatment with Liberase TM and DNase. The cells were washed, stained and analysed by flow cytometry as described in materials and methods.

**(a)** Cultured thymic cells, live gate in SSC versus FSC. **(b-d)** Left panel: unstained control cells, right panel: staining of CD45, HLA-DR and ER-TR7, respectively (y-axis). Data are shown as dot-plots with an empty channel (x-axis), as the cells are highly autofluorescent and a histogram therefore could be misleading. **(e)** Left panel: unstained control, right panel: CD11c (y-axis), plotted against FSC (x-axis).
