# Supplementary material for: Human thymic epithelial primary cells produce exosomes carrying tissue-restricted antigens
Source: PubMed Central journal article supplement — Immunol Cell Biol. 2015 Mar 17;93(8):727–34. doi: 10.1038/icb.2015.33 (PMC4575951; doi:10.1038/icb.2015.33), 2015-03-17
Supplement: icb201533x2.pdf [file icb201533x2.pdf]

**Table S1.** Identified proteins in cells (culture 1)

| Acc. Nr.(Swissprot) | Description                                                                                          |
|---------------------|------------------------------------------------------------------------------------------------------|
| Q15149              | Plectin OS=Homo sapiens GN=PLEC PE=1 SV=3 - [PLEC_HUMAN]                                             |
| P35579              | Myosin-9 OS=Homo sapiens GN=MYH9 PE=1 SV=4 - [MYH9_HUMAN]                                            |
| Q04695              | Keratin, type I cytoskeletal 17 OS=Homo sapiens GN=KRT17 PE=1 SV=2 - [K1C17_HUMAN]                   |
| P02538              | Keratin, type II cytoskeletal 6A OS=Homo sapiens GN=KRT6A PE=1 SV=3 - [K2C6A_HUMAN]                  |
| P02533              | Keratin, type I cytoskeletal 14 OS=Homo sapiens GN=KRT14 PE=1 SV=4 - [K1C14_HUMAN]                   |
| P13647              | Keratin, type II cytoskeletal 5 OS=Homo sapiens GN=KRT5 PE=1 SV=3 - [K2C5_HUMAN]                     |
| P04259              | Keratin, type II cytoskeletal 6B OS=Homo sapiens GN=KRT6B PE=1 SV=5 - [K2C6B_HUMAN]                  |
| P60709              | Actin, cytoplasmic 1 OS=Homo sapiens GN=ACTB PE=1 SV=1 - [ACTB_HUMAN]                                |
| P21333              | Filamin-A OS=Homo sapiens GN=FLNA PE=1 SV=4 - [FLNA_HUMAN]                                           |
| P02768              | Serum albumin OS=Homo sapiens GN=ALB PE=1 SV=2 - [ALBU_HUMAN]                                        |
| P08779              | Keratin, type I cytoskeletal 16 OS=Homo sapiens GN=KRT16 PE=1 SV=4 - [K1C16_HUMAN]                   |
| O75369              | Filamin-B OS=Homo sapiens GN=FLNB PE=1 SV=2 - [FLNB_HUMAN]                                           |
| P07355              | Annexin A2 OS=Homo sapiens GN=ANXA2 PE=1 SV=2 - [ANXA2_HUMAN]                                        |
| P08727              | Keratin, type I cytoskeletal 19 OS=Homo sapiens GN=KRT19 PE=1 SV=4 - [K1C19_HUMAN]                   |
| P04083              | Annexin A1 OS=Homo sapiens GN=ANXA1 PE=1 SV=2 - [ANXA1_HUMAN]                                        |
| P68032              | Actin, alpha cardiac muscle 1 OS=Homo sapiens GN=ACTC1 PE=1 SV=1 - [ACTC_HUMAN]                      |
| P08670              | Vimentin OS=Homo sapiens GN=VIM PE=1 SV=4 - [VIME_HUMAN]                                             |
| P07437              | Tubulin beta chain OS=Homo sapiens GN=TUBB PE=1 SV=2 - [TBB5_HUMAN]                                  |
| P12111              | Collagen alpha-3(VI) chain OS=Homo sapiens GN=COL6A3 PE=1 SV=5 - [CO6A3_HUMAN]                       |
| P68371              | Tubulin beta-2C chain OS=Homo sapiens GN=TUBB2C PE=1 SV=1 - [TBB2C_HUMAN]                            |
| P08238              | Heat shock protein HSP 90-beta OS=Homo sapiens GN=HSP90AB1 PE=1 SV=4 - [HS90B_HUMAN]                 |
| P15924              | Desmoplakin OS=Homo sapiens GN=DSP PE=1 SV=3 - [DESP_HUMAN]                                          |
| Q13813              | Spectrin alpha chain, brain OS=Homo sapiens GN=SPTAN1 PE=1 SV=3 - [SPTA2_HUMAN]                      |
| Q9BQE3              | Tubulin alpha-1C chain OS=Homo sapiens GN=TUBA1C PE=1 SV=1 - [TBA1C_HUMAN]                           |
| P14618              | Pyruvate kinase isozymes M1/M2 OS=Homo sapiens GN=PKM2 PE=1 SV=4 - [KPYM_HUMAN]                      |
| O43707              | Alpha-actinin-4 OS=Homo sapiens GN=ACTN4 PE=1 SV=2 - [ACTN4_HUMAN]                                   |
| Q00610              | Clathrin heavy chain 1 OS=Homo sapiens GN=CLTC PE=1 SV=5 - [CLH1_HUMAN]                              |
| P01023              | Alpha-2-macroglobulin OS=Homo sapiens GN=A2M PE=1 SV=3 - [A2MG_HUMAN]                                |
| P12814              | Alpha-actinin-1 OS=Homo sapiens GN=ACTN1 PE=1 SV=2 - [ACTN1_HUMAN]                                   |
| P04406              | Glyceraldehyde-3-phosphate dehydrogenase OS=Homo sapiens GN=GAPDH PE=1 SV=3 - [G3P_HUMAN]            |
| P02751              | Fibronectin OS=Homo sapiens GN=FN1 PE=1 SV=4 - [FINC_HUMAN]                                          |
| Q13885              | Tubulin beta-2A chain OS=Homo sapiens GN=TUBB2A PE=1 SV=1 - [TBB2A_HUMAN]                            |
| Q01082              | Spectrin beta chain, brain 1 OS=Homo sapiens GN=SPTBN1 PE=1 SV=2 - [SPTB2_HUMAN]                     |
| P07900              | Heat shock protein HSP 90-alpha OS=Homo sapiens GN=HSP90AA1 PE=1 SV=5 - [HS90A_HUMAN]                |
| P13645              | Keratin, type I cytoskeletal 10 OS=Homo sapiens GN=KRT10 PE=1 SV=6 - [K1C10_HUMAN]                   |
| P11142              | Heat shock cognate 71 kDa protein OS=Homo sapiens GN=HSPA8 PE=1 SV=1 - [HSP7C_HUMAN]                 |
| P35908              | Keratin, type II cytoskeletal 2 epidermal OS=Homo sapiens GN=KRT2 PE=1 SV=2 - [K22E_HUMAN]           |
| P49327              | Fatty acid synthase OS=Homo sapiens GN=FASN PE=1 SV=3 - [FAS_HUMAN]                                  |
| P13646              | Keratin, type I cytoskeletal 13 OS=Homo sapiens GN=KRT13 PE=1 SV=4 - [K1C13_HUMAN]                   |
| Q13509              | Tubulin beta-3 chain OS=Homo sapiens GN=TUBB3 PE=1 SV=2 - [TBB3_HUMAN]                               |
| P18206              | Vinculin OS=Homo sapiens GN=VCL PE=1 SV=4 - [VINC_HUMAN]                                             |
| P04264              | Keratin, type II cytoskeletal 1 OS=Homo sapiens GN=KRT1 PE=1 SV=6 - [K2C1_HUMAN]                     |
| Q09666              | Neuroblast differentiation-associated protein AHNK OS=Homo sapiens GN=AHNAK PE=1 SV=2 - [AHNK_HUMAN] |
| Q9Y490              | Talin-1 OS=Homo sapiens GN=TLN1 PE=1 SV=3 - [TLN1_HUMAN]                                             |
| P31947              | 14-3-3 protein sigma OS=Homo sapiens GN=SFN PE=1 SV=1 - [1433S_HUMAN]                                |
| P19823              | Inter-alpha-trypsin inhibitor heavy chain H2 OS=Homo sapiens GN=ITIH2 PE=1 SV=2 - [ITIH2_HUMAN]      |
| Q562R1              | Beta-actin-like protein 2 OS=Homo sapiens GN=ACTBL2 PE=1 SV=2 - [ACTBL_HUMAN]                        |
| P06733              | Alpha-enolase OS=Homo sapiens GN=ENO1 PE=1 SV=2 - [ENOA_HUMAN]                                       |
| P12035              | Keratin, type II cytoskeletal 3 OS=Homo sapiens GN=KRT3 PE=1 SV=3 - [K2C3_HUMAN]                     |
| P68366              | Tubulin alpha-4A chain OS=Homo sapiens GN=TUBA4A PE=1 SV=1 - [TBA4A_HUMAN]                           |
| P05787              | Keratin, type II cytoskeletal 8 OS=Homo sapiens GN=KRT8 PE=1 SV=7 - [K2C8_HUMAN]                     |
| P02765              | Alpha-2-HS-glycoprotein OS=Homo sapiens GN=AHSG PE=1 SV=1 - [FETUA_HUMAN]                            |
| P62805              | Histone H4 OS=Homo sapiens GN=HIST1H4A PE=1 SV=2 - [H4_HUMAN]                                        |
| P11021              | 78 kDa glucose-regulated protein OS=Homo sapiens GN=HSPA5 PE=1 SV=2 - [GRP78_HUMAN]                  |
| P05120              | Plasminogen activator inhibitor 2 OS=Homo sapiens GN=SERPINB2 PE=1 SV=2 - [PAI2_HUMAN]               |

P63104 14-3-3 protein zeta/delta OS=Homo sapiens GN=YWHAZ PE=1 SV=1 - [1433Z\_HUMAN]  
P68104 Elongation factor 1-alpha 1 OS=Homo sapiens GN=EEF1A1 PE=1 SV=1 - [EF1A1\_HUMAN]  
P26038 Moesin OS=Homo sapiens GN=MSN PE=1 SV=3 - [MOES\_HUMAN]  
P06576 ATP synthase subunit beta, mitochondrial OS=Homo sapiens GN=ATP5B PE=1 SV=3 - [ATPB\_HUMAN]  
Q9BUF5 Tubulin beta-6 chain OS=Homo sapiens GN=TUBB6 PE=1 SV=1 - [TBB6\_HUMAN]  
P02545 Prelamin-A/C OS=Homo sapiens GN=LMNA PE=1 SV=1 - [LMNA\_HUMAN]  
P13639 Elongation factor 2 OS=Homo sapiens GN=EEF2 PE=1 SV=4 - [EF2\_HUMAN]  
P14625 Endoplasmic reticulum chaperone BiP OS=Homo sapiens GN=HSP90B1 PE=1 SV=1 - [ENPL\_HUMAN]  
P09211 Glutathione S-transferase P OS=Homo sapiens GN=GSTP1 PE=1 SV=2 - [GSTP1\_HUMAN]  
P55072 Transitional endoplasmic reticulum ATPase OS=Homo sapiens GN=VCP PE=1 SV=4 - [TERA\_HUMAN]  
P15311 Ezrin OS=Homo sapiens GN=EZR PE=1 SV=4 - [EZRI\_HUMAN]  
Q9UPN3 Microtubule-actin cross-linking factor 1, isoforms 1/2/3/5 OS=Homo sapiens GN=MACF1 PE=1 SV=4 - [MACF1\_HUMAN]  
Q14204 Cytoplasmic dynein 1 heavy chain 1 OS=Homo sapiens GN=DYNC1H1 PE=1 SV=5 - [DYHC1\_HUMAN]  
P31946 14-3-3 protein beta/alpha OS=Homo sapiens GN=YWHAB PE=1 SV=3 - [1433B\_HUMAN]  
P36952 Serpin B5 OS=Homo sapiens GN=SERPINB5 PE=1 SV=2 - [SPB5\_HUMAN]  
P27348 14-3-3 protein theta OS=Homo sapiens GN=YWHAQ PE=1 SV=1 - [1433T\_HUMAN]  
P58876 Histone H2B type 1-D OS=Homo sapiens GN=HIST1H2BD PE=1 SV=2 - [H2B1D\_HUMAN]  
Q14CN4 Keratin, type II cytoskeletal 72 OS=Homo sapiens GN=KRT72 PE=1 SV=2 - [K2C72\_HUMAN]  
P35527 Keratin, type I cytoskeletal 9 OS=Homo sapiens GN=KRT9 PE=1 SV=3 - [K1C9\_HUMAN]  
P08107 Heat shock 70 kDa protein 1A/1B OS=Homo sapiens GN=HSPA1A PE=1 SV=5 - [HSP71\_HUMAN]  
P00338 L-lactate dehydrogenase A chain OS=Homo sapiens GN=LDHA PE=1 SV=2 - [LDHA\_HUMAN]  
P22314 Ubiquitin-like modifier-activating enzyme 1 OS=Homo sapiens GN=UBA1 PE=1 SV=3 - [UBA1\_HUMAN]  
Q14697 Neutral alpha-glucosidase AB OS=Homo sapiens GN=GANAB PE=1 SV=3 - [GANAB\_HUMAN]  
P08758 Annexin A5 OS=Homo sapiens GN=ANXA5 PE=1 SV=2 - [ANXA5\_HUMAN]  
P35580 Myosin-10 OS=Homo sapiens GN=MYH10 PE=1 SV=3 - [MYH10\_HUMAN]  
P08729 Keratin, type II cytoskeletal 7 OS=Homo sapiens GN=KRT7 PE=1 SV=5 - [K2C7\_HUMAN]  
P06396 Gelsolin OS=Homo sapiens GN=GSN PE=1 SV=1 - [GELS\_HUMAN]  
P23527 Histone H2B type 1-O OS=Homo sapiens GN=HIST1H2BO PE=1 SV=3 - [H2B1O\_HUMAN]  
P61981 14-3-3 protein gamma OS=Homo sapiens GN=YWHAG PE=1 SV=2 - [1433G\_HUMAN]  
P04075 Fructose-bisphosphate aldolase A OS=Homo sapiens GN=ALDOA PE=1 SV=2 - [ALDOA\_HUMAN]  
P42704 Leucine-rich PPR motif-containing protein, mitochondrial OS=Homo sapiens GN=LRPPRC PE=1 SV=3 - [LRPPRC\_HUMAN]  
P06702 Protein S100-A9 OS=Homo sapiens GN=S100A9 PE=1 SV=1 - [S10A9\_HUMAN]  
P60174 Triosephosphate isomerase OS=Homo sapiens GN=TPI1 PE=1 SV=3 - [TPIS\_HUMAN]  
P62258 14-3-3 protein epsilon OS=Homo sapiens GN=YWHAE PE=1 SV=1 - [1433E\_HUMAN]  
Q7Z406 Myosin-14 OS=Homo sapiens GN=MYH14 PE=1 SV=2 - [MYH14\_HUMAN]  
P00558 Phosphoglycerate kinase 1 OS=Homo sapiens GN=PGK1 PE=1 SV=3 - [PGK1\_HUMAN]  
P07237 Protein disulfide-isomerase OS=Homo sapiens GN=P4HB PE=1 SV=3 - [PDIA1\_HUMAN]  
O60437 Periplakin OS=Homo sapiens GN=PPL PE=1 SV=4 - [PEPL\_HUMAN]  
P67936 Tropomyosin alpha-4 chain OS=Homo sapiens GN=TPM4 PE=1 SV=3 - [TPM4\_HUMAN]  
P60842 Eukaryotic initiation factor 4A-I OS=Homo sapiens GN=EIF4A1 PE=1 SV=1 - [IF4A1\_HUMAN]  
P12109 Collagen alpha-1(VI) chain OS=Homo sapiens GN=COL6A1 PE=1 SV=3 - [CO6A1\_HUMAN]  
Q14315 Filamin-C OS=Homo sapiens GN=FLNC PE=1 SV=3 - [FLNC\_HUMAN]  
O00410 Importin-5 OS=Homo sapiens GN=IPO5 PE=1 SV=4 - [IPO5\_HUMAN]  
P22626 Heterogeneous nuclear ribonucleoproteins A2/B1 OS=Homo sapiens GN=HNRNPA2B1 PE=1 SV=2 - [ROA2\_HUMAN]  
P30101 Protein disulfide-isomerase A3 OS=Homo sapiens GN=PDIA3 PE=1 SV=4 - [PDIA3\_HUMAN]  
P21980 Protein-glutamine gamma-glutamyltransferase 2 OS=Homo sapiens GN=TGM2 PE=1 SV=2 - [TGM2\_HUMAN]  
P46781 40S ribosomal protein S9 OS=Homo sapiens GN=RPS9 PE=1 SV=3 - [RS9\_HUMAN]  
P18669 Phosphoglycerate mutase 1 OS=Homo sapiens GN=PGAM1 PE=1 SV=2 - [PGAM1\_HUMAN]  
P04792 Heat shock protein beta-1 OS=Homo sapiens GN=HSPB1 PE=1 SV=2 - [HSPB1\_HUMAN]  
P62937 Peptidyl-prolyl cis-trans isomerase A OS=Homo sapiens GN=PPIA PE=1 SV=2 - [PPIA\_HUMAN]  
P05783 Keratin, type I cytoskeletal 18 OS=Homo sapiens GN=KRT18 PE=1 SV=2 - [K1C18\_HUMAN]  
P08865 40S ribosomal protein SA OS=Homo sapiens GN=RPSA PE=1 SV=4 - [RSSA\_HUMAN]  
P78527 DNA-dependent protein kinase catalytic subunit OS=Homo sapiens GN=PRKDC PE=1 SV=3 - [PRKDC\_HUMAN]  
P14923 Junction plakoglobin OS=Homo sapiens GN=JUP PE=1 SV=3 - [PLAK\_HUMAN]  
P21796 Voltage-dependent anion-selective channel protein 1 OS=Homo sapiens GN=VDAC1 PE=1 SV=2 - [VDAC1\_HUMAN]  
Q07954 Pro-low-density lipoprotein receptor-related protein 1 OS=Homo sapiens GN=LRP1 PE=1 SV=2 - [LRP1\_HUMAN]  
P25705 ATP synthase subunit alpha, mitochondrial OS=Homo sapiens GN=ATP5A1 PE=1 SV=1 - [ATPA\_HUMAN]  
P07339 Cathepsin D OS=Homo sapiens GN=CTSD PE=1 SV=1 - [CATD\_HUMAN]

Q02878 60S ribosomal protein L6 OS=Homo sapiens GN=RPL6 PE=1 SV=3 - [RL6\_HUMAN]  
P67809 Nuclease-sensitive element-binding protein 1 OS=Homo sapiens GN=YBX1 PE=1 SV=3 - [YBOX1\_HUMAN]  
P12236 ADP/ATP translocase 3 OS=Homo sapiens GN=SLC25A6 PE=1 SV=4 - [ADT3\_HUMAN]  
P04179 Superoxide dismutase [Mn], mitochondrial OS=Homo sapiens GN=SOD2 PE=1 SV=2 - [SODM\_HUMAN]  
P05023 Sodium/potassium-transporting ATPase subunit alpha-1 OS=Homo sapiens GN=ATP1A1 PE=1 SV=1 - [AT1A1\_HUMAN]  
P04114 Apolipoprotein B-100 OS=Homo sapiens GN=APOB PE=1 SV=2 - [APOB\_HUMAN]  
Q04917 14-3-3 protein eta OS=Homo sapiens GN=YWHAH PE=1 SV=4 - [1433F\_HUMAN]  
P10809 60 kDa heat shock protein, mitochondrial OS=Homo sapiens GN=HSPD1 PE=1 SV=2 - [CH60\_HUMAN]  
P40926 Malate dehydrogenase, mitochondrial OS=Homo sapiens GN=MDH2 PE=1 SV=3 - [MDHM\_HUMAN]  
P46940 Ras GTPase-activating-like protein IQGAP1 OS=Homo sapiens GN=IQGAP1 PE=1 SV=1 - [IQGA1\_HUMAN]  
P06748 Nucleophosmin OS=Homo sapiens GN=NPM1 PE=1 SV=2 - [NPM\_HUMAN]  
P50454 Serpin H1 OS=Homo sapiens GN=SERPINH1 PE=1 SV=2 - [SERPH\_HUMAN]  
P01024 Complement C3 OS=Homo sapiens GN=C3 PE=1 SV=2 - [CO3\_HUMAN]  
P05141 ADP/ATP translocase 2 OS=Homo sapiens GN=SLC25A5 PE=1 SV=7 - [ADT2\_HUMAN]  
P09651 Heterogeneous nuclear ribonucleoprotein A1 OS=Homo sapiens GN=HNRNPA1 PE=1 SV=5 - [ROA1\_HUMAN]  
P09382 Galectin-1 OS=Homo sapiens GN=LGALS1 PE=1 SV=2 - [LEG1\_HUMAN]  
P0CG48 Polyubiquitin-C OS=Homo sapiens GN=UBC PE=1 SV=3 - [UBC\_HUMAN]  
Q96KK5 Histone H2A type 1-H OS=Homo sapiens GN=HIST1H2AH PE=1 SV=3 - [H2A1H\_HUMAN]  
Q92817 Envoplakin OS=Homo sapiens GN=EVPL PE=1 SV=3 - [EVPL\_HUMAN]  
P02452 Collagen alpha-1(I) chain OS=Homo sapiens GN=COL1A1 PE=1 SV=5 - [CO1A1\_HUMAN]  
P12110 Collagen alpha-2(VI) chain OS=Homo sapiens GN=COL6A2 PE=1 SV=4 - [CO6A2\_HUMAN]  
P07910 Heterogeneous nuclear ribonucleoproteins C1/C2 OS=Homo sapiens GN=HNRNPC PE=1 SV=4 - [HNRPC\_HUMAN]  
P19338 Nucleolin OS=Homo sapiens GN=NCL PE=1 SV=3 - [NUCL\_HUMAN]  
Q15084 Protein disulfide-isomerase A6 OS=Homo sapiens GN=PDIA6 PE=1 SV=1 - [PDIA6\_HUMAN]  
Q06830 Peroxiredoxin-1 OS=Homo sapiens GN=PRDX1 PE=1 SV=1 - [PRDX1\_HUMAN]  
P23396 40S ribosomal protein S3 OS=Homo sapiens GN=RPS3 PE=1 SV=2 - [RS3\_HUMAN]  
P23284 Peptidyl-prolyl cis-trans isomerase B OS=Homo sapiens GN=PPIB PE=1 SV=2 - [PPIB\_HUMAN]  
Q01518 Adenylyl cyclase-associated protein 1 OS=Homo sapiens GN=CAP1 PE=1 SV=5 - [CAP1\_HUMAN]  
P02771 Alpha-fetoprotein OS=Homo sapiens GN=AFP PE=1 SV=1 - [FETA\_HUMAN]  
P27824 Calnexin OS=Homo sapiens GN=CANX PE=1 SV=2 - [CALX\_HUMAN]  
P61978 Heterogeneous nuclear ribonucleoprotein K OS=Homo sapiens GN=HNRNPK PE=1 SV=1 - [HNRPK\_HUMAN]  
P18124 60S ribosomal protein L7 OS=Homo sapiens GN=RPL7 PE=1 SV=1 - [RL7\_HUMAN]  
Q14974 Importin subunit beta-1 OS=Homo sapiens GN=KPNB1 PE=1 SV=2 - [IMB1\_HUMAN]  
P29508 Serpin B3 OS=Homo sapiens GN=SERPINB3 PE=1 SV=2 - [SPB3\_HUMAN]  
Q15393 Splicing factor 3B subunit 3 OS=Homo sapiens GN=SF3B3 PE=1 SV=4 - [SF3B3\_HUMAN]  
P31949 Protein S100-A11 OS=Homo sapiens GN=S100A11 PE=1 SV=2 - [S10AB\_HUMAN]  
P15531 Nucleoside diphosphate kinase A OS=Homo sapiens GN=NME1 PE=1 SV=1 - [NDKA\_HUMAN]  
P23528 Cofilin-1 OS=Homo sapiens GN=CFL1 PE=1 SV=3 - [COF1\_HUMAN]  
Q96QV6 Histone H2A type 1-A OS=Homo sapiens GN=HIST1H2AA PE=1 SV=3 - [H2A1A\_HUMAN]  
P07195 L-lactate dehydrogenase B chain OS=Homo sapiens GN=LDHB PE=1 SV=2 - [LDHB\_HUMAN]  
P22392 Nucleoside diphosphate kinase B OS=Homo sapiens GN=NME2 PE=1 SV=1 - [NDKB\_HUMAN]  
Q86VP6 Cullin-associated NEDD8-dissociated protein 1 OS=Homo sapiens GN=CAND1 PE=1 SV=2 - [CAND1\_HUMAN]  
P38646 Stress-70 protein, mitochondrial OS=Homo sapiens GN=HSPA9 PE=1 SV=2 - [GRP75\_HUMAN]  
P62820 Ras-related protein Rab-1A OS=Homo sapiens GN=RAB1A PE=1 SV=3 - [RAB1A\_HUMAN]  
P34932 Heat shock 70 kDa protein 4 OS=Homo sapiens GN=HSPA4 PE=1 SV=4 - [HSP74\_HUMAN]  
P06753 Tropomyosin alpha-3 chain OS=Homo sapiens GN=TPM3 PE=1 SV=1 - [TPM3\_HUMAN]  
P02794 Ferritin heavy chain OS=Homo sapiens GN=FTH1 PE=1 SV=2 - [FRIH\_HUMAN]  
P61204 ADP-ribosylation factor 3 OS=Homo sapiens GN=ARF3 PE=1 SV=2 - [ARF3\_HUMAN]  
P11047 Laminin subunit gamma-1 OS=Homo sapiens GN=LAMC1 PE=1 SV=3 - [LAMC1\_HUMAN]  
P29401 Transketolase OS=Homo sapiens GN=TKT PE=1 SV=3 - [TKT\_HUMAN]  
Q07020 60S ribosomal protein L18 OS=Homo sapiens GN=RPL18 PE=1 SV=2 - [RL18\_HUMAN]  
P31943 Heterogeneous nuclear ribonucleoprotein H OS=Homo sapiens GN=HNRNPH1 PE=1 SV=4 - [HNRH1\_HUMAN]  
Q99623 Prohibitin-2 OS=Homo sapiens GN=PHB2 PE=1 SV=2 - [PHB2\_HUMAN]  
P26641 Elongation factor 1-gamma OS=Homo sapiens GN=EEF1G PE=1 SV=3 - [EF1G\_HUMAN]  
Q14103 Heterogeneous nuclear ribonucleoprotein D0 OS=Homo sapiens GN=HNRNPD PE=1 SV=1 - [HNRPD\_HUMAN]  
P08123 Collagen alpha-2(I) chain OS=Homo sapiens GN=COL1A2 PE=1 SV=7 - [CO1A2\_HUMAN]  
P78371 T-complex protein 1 subunit beta OS=Homo sapiens GN=CCT2 PE=1 SV=4 - [TCPB\_HUMAN]  
P29692 Elongation factor 1-delta OS=Homo sapiens GN=EEF1D PE=1 SV=5 - [EF1D\_HUMAN]

P37802 Transgelin-2 OS=Homo sapiens GN=TAGLN2 PE=1 SV=3 - [TAGL2\_HUMAN]  
P00387 NADH-cytochrome b5 reductase 3 OS=Homo sapiens GN=CYB5R3 PE=1 SV=3 - [NB5R3\_HUMAN]  
P13667 Protein disulfide-isomerase A4 OS=Homo sapiens GN=PDIA4 PE=1 SV=2 - [PDIA4\_HUMAN]  
P60660 Myosin light polypeptide 6 OS=Homo sapiens GN=MYL6 PE=1 SV=2 - [MYL6\_HUMAN]  
P19367 Hexokinase-1 OS=Homo sapiens GN=HK1 PE=1 SV=3 - [HXK1\_HUMAN]  
P07942 Laminin subunit beta-1 OS=Homo sapiens GN=LAMB1 PE=1 SV=2 - [LAMB1\_HUMAN]  
Q12931 Heat shock protein 75 kDa, mitochondrial OS=Homo sapiens GN=TRAP1 PE=1 SV=3 - [TRAP1\_HUMAN]  
P09525 Annexin A4 OS=Homo sapiens GN=ANXA4 PE=1 SV=4 - [ANXA4\_HUMAN]  
P11216 Glycogen phosphorylase, brain form OS=Homo sapiens GN=PYGB PE=1 SV=5 - [PYGB\_HUMAN]  
Q12797 Aspartyl/asparaginyl beta-hydroxylase OS=Homo sapiens GN=ASPH PE=1 SV=3 - [ASPH\_HUMAN]  
P16152 Carbonyl reductase [NADPH] 1 OS=Homo sapiens GN=CBR1 PE=1 SV=3 - [CBR1\_HUMAN]  
P19105 Myosin regulatory light chain 12A OS=Homo sapiens GN=MYL12A PE=1 SV=2 - [ML12A\_HUMAN]  
P35232 Prohibitin OS=Homo sapiens GN=PHB PE=1 SV=1 - [PHB\_HUMAN]  
Q9H0U4 Ras-related protein Rab-1B OS=Homo sapiens GN=RAB1B PE=1 SV=1 - [RAB1B\_HUMAN]  
P05388 60S acidic ribosomal protein P0 OS=Homo sapiens GN=RPLP0 PE=1 SV=1 - [RLA0\_HUMAN]  
P69905 Hemoglobin subunit alpha OS=Homo sapiens GN=HBA1 PE=1 SV=2 - [HBA\_HUMAN]  
P39023 60S ribosomal protein L3 OS=Homo sapiens GN=RPL3 PE=1 SV=2 - [RL3\_HUMAN]  
P16144 Integrin beta-4 OS=Homo sapiens GN=ITGB4 PE=1 SV=5 - [ITB4\_HUMAN]  
P07858 Cathepsin B OS=Homo sapiens GN=CTSB PE=1 SV=3 - [CATB\_HUMAN]  
P17301 Integrin alpha-2 OS=Homo sapiens GN=ITGA2 PE=1 SV=1 - [ITA2\_HUMAN]  
P13928 Annexin A8 OS=Homo sapiens GN=ANXA8 PE=1 SV=3 - [ANXA8\_HUMAN]  
O00299 Chloride intracellular channel protein 1 OS=Homo sapiens GN=CLIC1 PE=1 SV=4 - [CLIC1\_HUMAN]  
P61313 60S ribosomal protein L15 OS=Homo sapiens GN=RPL15 PE=1 SV=2 - [RL15\_HUMAN]  
Q07065 Cytoskeleton-associated protein 4 OS=Homo sapiens GN=CKAP4 PE=1 SV=2 - [CKAP4\_HUMAN]  
P50990 T-complex protein 1 subunit theta OS=Homo sapiens GN=CCT8 PE=1 SV=4 - [TCPQ\_HUMAN]  
Q06033 Inter-alpha-trypsin inhibitor heavy chain H3 OS=Homo sapiens GN=ITIH3 PE=1 SV=2 - [ITIH3\_HUMAN]  
Q9NYU2 UDP-glucose:glycoprotein glucosyltransferase 1 OS=Homo sapiens GN=UGGT1 PE=1 SV=3 - [UGGG1\_HUMAN]  
P36578 60S ribosomal protein L4 OS=Homo sapiens GN=RPL4 PE=1 SV=5 - [RL4\_HUMAN]  
P46777 60S ribosomal protein L5 OS=Homo sapiens GN=RPL5 PE=1 SV=3 - [RL5\_HUMAN]  
P13010 X-ray repair cross-complementing protein 5 OS=Homo sapiens GN=XRCC5 PE=1 SV=3 - [XRCC5\_HUMAN]  
P40121 Macrophage-capping protein OS=Homo sapiens GN=CAPG PE=1 SV=2 - [CAPG\_HUMAN]  
P35606 Coatamer subunit beta' OS=Homo sapiens GN=COPB2 PE=1 SV=2 - [COPB2\_HUMAN]  
P36955 Pigment epithelium-derived factor OS=Homo sapiens GN=SERPINF1 PE=1 SV=4 - [PEDF\_HUMAN]  
P02792 Ferritin light chain OS=Homo sapiens GN=FTL PE=1 SV=2 - [FRIL\_HUMAN]  
P55786 Puromycin-sensitive aminopeptidase OS=Homo sapiens GN=NPEPPS PE=1 SV=2 - [PSA\_HUMAN]  
P05556 Integrin beta-1 OS=Homo sapiens GN=ITGB1 PE=1 SV=2 - [ITB1\_HUMAN]  
P27797 Calreticulin OS=Homo sapiens GN=CALR PE=1 SV=1 - [CALR\_HUMAN]  
P30085 UMP-CMP kinase OS=Homo sapiens GN=CMPK1 PE=1 SV=3 - [KCY\_HUMAN]  
P30740 Leukocyte elastase inhibitor OS=Homo sapiens GN=SERPINB1 PE=1 SV=1 - [ILEU\_HUMAN]  
O15372 Eukaryotic translation initiation factor 3 subunit H OS=Homo sapiens GN=EIF3H PE=1 SV=1 - [EIF3H\_HUMAN]  
Q16851 UTP-glucose-1-phosphate uridylyltransferase OS=Homo sapiens GN=UGP2 PE=1 SV=5 - [UGPA\_HUMAN]  
P47756 F-actin-capping protein subunit beta OS=Homo sapiens GN=CAPZB PE=1 SV=4 - [CAPZB\_HUMAN]  
P10620 Microsomal glutathione S-transferase 1 OS=Homo sapiens GN=MGST1 PE=1 SV=1 - [MGST1\_HUMAN]  
O95373 Importin-7 OS=Homo sapiens GN=IPO7 PE=1 SV=1 - [IPO7\_HUMAN]  
P52272 Heterogeneous nuclear ribonucleoprotein M OS=Homo sapiens GN=HNRNPM PE=1 SV=3 - [HNRPM\_HUMAN]  
P07737 Profilin-1 OS=Homo sapiens GN=PFN1 PE=1 SV=2 - [PROF1\_HUMAN]  
P52895 Aldo-keto reductase family 1 member C2 OS=Homo sapiens GN=AKR1C2 PE=1 SV=3 - [AK1C2\_HUMAN]  
P0C0S5 Histone H2A.Z OS=Homo sapiens GN=H2AFZ PE=1 SV=2 - [H2AZ\_HUMAN]  
P52907 F-actin-capping protein subunit alpha-1 OS=Homo sapiens GN=CAPZA1 PE=1 SV=3 - [CAZA1\_HUMAN]  
P50395 Rab GDP dissociation inhibitor beta OS=Homo sapiens GN=GDI2 PE=1 SV=2 - [GDIB\_HUMAN]  
P61247 40S ribosomal protein S3a OS=Homo sapiens GN=RPS3A PE=1 SV=2 - [RS3A\_HUMAN]  
P52565 Rho GDP-dissociation inhibitor 1 OS=Homo sapiens GN=ARHGDI1 PE=1 SV=3 - [GDIR1\_HUMAN]  
P04632 Calpain small subunit 1 OS=Homo sapiens GN=CAPNS1 PE=1 SV=1 - [CPNS1\_HUMAN]  
P55060 Exportin-2 OS=Homo sapiens GN=CSE1L PE=1 SV=3 - [XPO2\_HUMAN]  
P29966 Myristoylated alanine-rich C-kinase substrate OS=Homo sapiens GN=MARCKS PE=1 SV=4 - [MARCS\_HUMAN]  
P51149 Ras-related protein Rab-7a OS=Homo sapiens GN=RAB7A PE=1 SV=1 - [RAB7A\_HUMAN]  
P15880 40S ribosomal protein S2 OS=Homo sapiens GN=RPS2 PE=1 SV=2 - [RS2\_HUMAN]  
P42330 Aldo-keto reductase family 1 member C3 OS=Homo sapiens GN=AKR1C3 PE=1 SV=4 - [AK1C3\_HUMAN]

Q13835 Plakophilin-1 OS=Homo sapiens GN=PKP1 PE=1 SV=2 - [PKP1\_HUMAN]  
 Q03135 Caveolin-1 OS=Homo sapiens GN=CAV1 PE=1 SV=4 - [CAV1\_HUMAN]  
 P06744 Glucose-6-phosphate isomerase OS=Homo sapiens GN=GPI PE=1 SV=4 - [G6PI\_HUMAN]  
 P61026 Ras-related protein Rab-10 OS=Homo sapiens GN=RAB10 PE=1 SV=1 - [RAB10\_HUMAN]  
 P19827 Inter-alpha-trypsin inhibitor heavy chain H1 OS=Homo sapiens GN=ITIH1 PE=1 SV=3 - [ITIH1\_HUMAN]  
 P05109 Protein S100-A8 OS=Homo sapiens GN=S100A8 PE=1 SV=1 - [S10A8\_HUMAN]  
 Q99714 3-hydroxyacyl-CoA dehydrogenase type-2 OS=Homo sapiens GN=HSD17B10 PE=1 SV=3 - [HCD2\_HUMAN]  
 P52209 6-phosphogluconate dehydrogenase, decarboxylating OS=Homo sapiens GN=PGD PE=1 SV=3 - [6PGD\_HUMAN]  
 P20073 Annexin A7 OS=Homo sapiens GN=ANXA7 PE=1 SV=3 - [ANXA7\_HUMAN]  
 P60903 Protein S100-A10 OS=Homo sapiens GN=S100A10 PE=1 SV=2 - [S10AA\_HUMAN]  
 O00571 ATP-dependent RNA helicase DDX3X OS=Homo sapiens GN=DDX3X PE=1 SV=3 - [DDX3X\_HUMAN]  
 Q08211 ATP-dependent RNA helicase A OS=Homo sapiens GN=DHX9 PE=1 SV=4 - [DHX9\_HUMAN]  
 P24534 Elongation factor 1-beta OS=Homo sapiens GN=EEF1B2 PE=1 SV=3 - [EF1B\_HUMAN]  
 Q7KZF4 Staphylococcal nuclease domain-containing protein 1 OS=Homo sapiens GN=SND1 PE=1 SV=1 - [SND1\_HUMAN]  
 P32119 Peroxiredoxin-2 OS=Homo sapiens GN=PRDX2 PE=1 SV=5 - [PRDX2\_HUMAN]  
 P11279 Lysosome-associated membrane glycoprotein 1 OS=Homo sapiens GN=LAMP1 PE=1 SV=3 - [LAMP1\_HUMAN]  
 P26373 60S ribosomal protein L13 OS=Homo sapiens GN=RPL13 PE=1 SV=4 - [RL13\_HUMAN]  
 P51148 Ras-related protein Rab-5C OS=Homo sapiens GN=RAB5C PE=1 SV=2 - [RAB5C\_HUMAN]  
 P22735 Protein-glutamine gamma-glutamyltransferase K OS=Homo sapiens GN=TGM1 PE=1 SV=4 - [TGM1\_HUMAN]  
 P10599 Thioredoxin OS=Homo sapiens GN=TXN PE=1 SV=3 - [THIO\_HUMAN]  
 O75874 Isocitrate dehydrogenase [NADP] cytoplasmic OS=Homo sapiens GN=IDH1 PE=1 SV=2 - [IDHC\_HUMAN]  
 P62424 60S ribosomal protein L7a OS=Homo sapiens GN=RPL7A PE=1 SV=2 - [RL7A\_HUMAN]  
 P49588 Alanyl-tRNA synthetase, cytoplasmic OS=Homo sapiens GN=AARS PE=1 SV=2 - [SYAC\_HUMAN]  
 P58107 Epiplakin OS=Homo sapiens GN=EPPK1 PE=1 SV=2 - [EPIPL\_HUMAN]  
 P12429 Annexin A3 OS=Homo sapiens GN=ANXA3 PE=1 SV=3 - [ANXA3\_HUMAN]  
 P09493 Tropomyosin alpha-1 chain OS=Homo sapiens GN=TPM1 PE=1 SV=2 - [TPM1\_HUMAN]  
 P62269 40S ribosomal protein S18 OS=Homo sapiens GN=RPS18 PE=1 SV=3 - [RS18\_HUMAN]  
 P62701 40S ribosomal protein S4, X isoform OS=Homo sapiens GN=RPS4X PE=1 SV=2 - [RS4X\_HUMAN]  
 P14324 Farnesyl pyrophosphate synthase OS=Homo sapiens GN=FDPS PE=1 SV=4 - [FPPS\_HUMAN]  
 P05387 60S acidic ribosomal protein P2 OS=Homo sapiens GN=RPLP2 PE=1 SV=1 - [RLA2\_HUMAN]  
 P53621 Coatamer subunit alpha OS=Homo sapiens GN=COPA PE=1 SV=2 - [COPA\_HUMAN]  
 Q00839 Heterogeneous nuclear ribonucleoprotein U OS=Homo sapiens GN=HNRNPU PE=1 SV=6 - [HNRPU\_HUMAN]  
 P11717 Cation-independent mannose-6-phosphate receptor OS=Homo sapiens GN=IGF2R PE=1 SV=3 - [MPRI\_HUMAN]  
 Q16531 DNA damage-binding protein 1 OS=Homo sapiens GN=DDB1 PE=1 SV=1 - [DDB1\_HUMAN]  
 P18085 ADP-ribosylation factor 4 OS=Homo sapiens GN=ARF4 PE=1 SV=3 - [ARF4\_HUMAN]  
 P30041 Peroxiredoxin-6 OS=Homo sapiens GN=PRDX6 PE=1 SV=3 - [PRDX6\_HUMAN]  
 P61006 Ras-related protein Rab-8A OS=Homo sapiens GN=RAB8A PE=1 SV=1 - [RAB8A\_HUMAN]  
 P09972 Fructose-bisphosphate aldolase C OS=Homo sapiens GN=ALDOC PE=1 SV=2 - [ALDOC\_HUMAN]  
 P17931 Galectin-3 OS=Homo sapiens GN=LGALS3 PE=1 SV=5 - [LEG3\_HUMAN]  
 P13473 Lysosome-associated membrane glycoprotein 2 OS=Homo sapiens GN=LAMP2 PE=1 SV=2 - [LAMP2\_HUMAN]  
 P14866 Heterogeneous nuclear ribonucleoprotein L OS=Homo sapiens GN=HNRNPL PE=1 SV=2 - [HNRPL\_HUMAN]  
 P37837 Transaldolase OS=Homo sapiens GN=TALDO1 PE=1 SV=2 - [TALDO\_HUMAN]  
 Q15075 Early endosome antigen 1 OS=Homo sapiens GN=EAA1 PE=1 SV=2 - [EAA1\_HUMAN]  
 P52597 Heterogeneous nuclear ribonucleoprotein F OS=Homo sapiens GN=HNRNPF PE=1 SV=3 - [HNRPF\_HUMAN]  
 O43795 Myosin-Ib OS=Homo sapiens GN=MYO1B PE=1 SV=3 - [MYO1B\_HUMAN]  
 Q03252 Lamin-B2 OS=Homo sapiens GN=LMNB2 PE=1 SV=3 - [LMNB2\_HUMAN]  
 Q13765 Nascent polypeptide-associated complex subunit alpha OS=Homo sapiens GN=NACA PE=1 SV=1 - [NACA\_HUMAN]  
 P27105 Erythrocyte band 7 integral membrane protein OS=Homo sapiens GN=STOM PE=1 SV=3 - [STOM\_HUMAN]  
 P48444 Coatamer subunit delta OS=Homo sapiens GN=ARCN1 PE=1 SV=1 - [COPD\_HUMAN]  
 P00491 Purine nucleoside phosphorylase OS=Homo sapiens GN=PNP PE=1 SV=2 - [PNPH\_HUMAN]  
 O75367 Core histone macro-H2A.1 OS=Homo sapiens GN=H2AFY PE=1 SV=4 - [H2AY\_HUMAN]  
 O60763 General vesicular transport factor p115 OS=Homo sapiens GN=USO1 PE=1 SV=2 - [USO1\_HUMAN]  
 Q15365 Poly(rC)-binding protein 1 OS=Homo sapiens GN=PCBP1 PE=1 SV=2 - [PCBP1\_HUMAN]  
 Q13200 26S proteasome non-ATPase regulatory subunit 2 OS=Homo sapiens GN=PSMD2 PE=1 SV=3 - [PSMD2\_HUMAN]  
 Q9NQC3 Reticulon-4 OS=Homo sapiens GN=RTN4 PE=1 SV=2 - [RTN4\_HUMAN]  
 A6NL28 Putative tropomyosin alpha-3 chain-like protein OS=Homo sapiens PE=5 SV=2 - [TPM3L\_HUMAN]  
 Q16658 Fascin OS=Homo sapiens GN=FSCN1 PE=1 SV=3 - [FSCN1\_HUMAN]  
 P27482 Calmodulin-like protein 3 OS=Homo sapiens GN=CALML3 PE=1 SV=2 - [CALL3\_HUMAN]

P02461 Collagen alpha-1(III) chain OS=Homo sapiens GN=COL3A1 PE=1 SV=4 - [CO3A1\_HUMAN]  
P13797 Plastin-3 OS=Homo sapiens GN=PLS3 PE=1 SV=4 - [PLST\_HUMAN]  
P68431 Histone H3.1 OS=Homo sapiens GN=HIST1H3A PE=1 SV=2 - [H31\_HUMAN]  
P63244 Guanine nucleotide-binding protein subunit beta-2-like 1 OS=Homo sapiens GN=GNB2L1 PE=1 SV=3 - [GBLP\_HUMAN]  
P38919 Eukaryotic initiation factor 4A-III OS=Homo sapiens GN=EIF4A3 PE=1 SV=4 - [IF4A3\_HUMAN]  
Q9HCY8 Protein S100-A14 OS=Homo sapiens GN=S100A14 PE=1 SV=1 - [S10AE\_HUMAN]  
Q92598 Heat shock protein 105 kDa OS=Homo sapiens GN=HSPH1 PE=1 SV=1 - [HS105\_HUMAN]  
P36542 ATP synthase subunit gamma, mitochondrial OS=Homo sapiens GN=ATP5C1 PE=1 SV=1 - [ATPG\_HUMAN]  
P04080 Cystatin-B OS=Homo sapiens GN=CSTB PE=1 SV=2 - [CYTB\_HUMAN]  
P62241 40S ribosomal protein S8 OS=Homo sapiens GN=RPS8 PE=1 SV=2 - [RS8\_HUMAN]  
P08195 4F2 cell-surface antigen heavy chain OS=Homo sapiens GN=SLC3A2 PE=1 SV=3 - [4F2\_HUMAN]  
Q15363 Transmembrane emp24 domain-containing protein 2 OS=Homo sapiens GN=TMED2 PE=1 SV=1 - [TMED2\_HUMAN]  
P48643 T-complex protein 1 subunit epsilon OS=Homo sapiens GN=CCT5 PE=1 SV=1 - [TCPE\_HUMAN]  
P30050 60S ribosomal protein L12 OS=Homo sapiens GN=RPL12 PE=1 SV=1 - [RL12\_HUMAN]  
P62917 60S ribosomal protein L8 OS=Homo sapiens GN=RPL8 PE=1 SV=2 - [RL8\_HUMAN]  
P14314 Glucosidase 2 subunit beta OS=Homo sapiens GN=PRKCSH PE=1 SV=2 - [GLU2B\_HUMAN]  
P49748 Very long-chain specific acyl-CoA dehydrogenase, mitochondrial OS=Homo sapiens GN=ACADVL PE=1 SV=1  
P25786 Proteasome subunit alpha type-1 OS=Homo sapiens GN=PSMA1 PE=1 SV=1 - [PSA1\_HUMAN]  
P28074 Proteasome subunit beta type-5 OS=Homo sapiens GN=PSMB5 PE=1 SV=3 - [PSB5\_HUMAN]  
Q13753 Laminin subunit gamma-2 OS=Homo sapiens GN=LAMC2 PE=1 SV=2 - [LAMC2\_HUMAN]  
P07996 Thrombospondin-1 OS=Homo sapiens GN=THBS1 PE=1 SV=2 - [TSP1\_HUMAN]  
O14980 Exportin-1 OS=Homo sapiens GN=XPO1 PE=1 SV=1 - [XPO1\_HUMAN]  
P06454 Prothymosin alpha OS=Homo sapiens GN=PTMA PE=1 SV=2 - [PTMA\_HUMAN]  
P51659 Peroxisomal multifunctional enzyme type 2 OS=Homo sapiens GN=HSD17B4 PE=1 SV=3 - [DHB4\_HUMAN]  
Q9Y277 Voltage-dependent anion-selective channel protein 3 OS=Homo sapiens GN=VDAC3 PE=1 SV=1 - [VDAC3\_HUMAN]  
Q86UP2 Kinectin OS=Homo sapiens GN=KTN1 PE=1 SV=1 - [KTN1\_HUMAN]  
Q9UQ80 Proliferation-associated protein 2G4 OS=Homo sapiens GN=PA2G4 PE=1 SV=3 - [PA2G4\_HUMAN]  
P02788 Lactotransferrin OS=Homo sapiens GN=LTF PE=1 SV=6 - [TRFL\_HUMAN]  
P33176 Kinesin-1 heavy chain OS=Homo sapiens GN=KIF5B PE=1 SV=1 - [KINH\_HUMAN]  
Q96FQ6 Protein S100-A16 OS=Homo sapiens GN=S100A16 PE=1 SV=1 - [S10AG\_HUMAN]  
Q07021 Complement component 1 Q subcomponent-binding protein, mitochondrial OS=Homo sapiens GN=C1QBP PE=1 SV=1  
P15144 Aminopeptidase N OS=Homo sapiens GN=ANPEP PE=1 SV=4 - [AMPN\_HUMAN]  
P30040 Endoplasmic reticulum resident protein 29 OS=Homo sapiens GN=ERP29 PE=1 SV=4 - [ERP29\_HUMAN]  
P78417 Glutathione S-transferase omega-1 OS=Homo sapiens GN=GSTO1 PE=1 SV=2 - [GSTO1\_HUMAN]  
P62249 40S ribosomal protein S16 OS=Homo sapiens GN=RPS16 PE=1 SV=2 - [RS16\_HUMAN]  
O60506 Heterogeneous nuclear ribonucleoprotein Q OS=Homo sapiens GN=SYNCRIP PE=1 SV=2 - [HNRPQ\_HUMAN]  
Q1KMD3 Heterogeneous nuclear ribonucleoprotein U-like protein 2 OS=Homo sapiens GN=HNRNPUL2 PE=1 SV=1  
P51884 Lumican OS=Homo sapiens GN=LUM PE=1 SV=2 - [LUM\_HUMAN]  
P62195 26S protease regulatory subunit 8 OS=Homo sapiens GN=PSMC5 PE=1 SV=1 - [PRS8\_HUMAN]  
P30043 Flavin reductase OS=Homo sapiens GN=BLVRB PE=1 SV=3 - [BLVRB\_HUMAN]  
P84085 ADP-ribosylation factor 5 OS=Homo sapiens GN=ARF5 PE=1 SV=2 - [ARF5\_HUMAN]  
P23526 Adenosylhomocysteinase OS=Homo sapiens GN=AHCY PE=1 SV=4 - [SAHH\_HUMAN]  
P63241 Eukaryotic translation initiation factor 5A-1 OS=Homo sapiens GN=EIF5A PE=1 SV=2 - [IF5A1\_HUMAN]  
Q9Y4L1 Hypoxia up-regulated protein 1 OS=Homo sapiens GN=HYOU1 PE=1 SV=1 - [HYOU1\_HUMAN]  
P23142 Fibulin-1 OS=Homo sapiens GN=FBLN1 PE=1 SV=4 - [FBLN1\_HUMAN]  
P51571 Translocon-associated protein subunit delta OS=Homo sapiens GN=SSR4 PE=1 SV=1 - [SSRD\_HUMAN]  
Q15366 Poly(rC)-binding protein 2 OS=Homo sapiens GN=PCBP2 PE=1 SV=1 - [PCBP2\_HUMAN]  
P13693 Translationally-controlled tumor protein OS=Homo sapiens GN=TPT1 PE=1 SV=1 - [TCTP\_HUMAN]  
P63010 AP-2 complex subunit beta OS=Homo sapiens GN=AP2B1 PE=1 SV=1 - [AP2B1\_HUMAN]  
O60716 Catenin delta-1 OS=Homo sapiens GN=CTNND1 PE=1 SV=1 - [CTND1\_HUMAN]  
P05198 Eukaryotic translation initiation factor 2 subunit 1 OS=Homo sapiens GN=EIF2S1 PE=1 SV=3 - [IF2A\_HUMAN]  
P61106 Ras-related protein Rab-14 OS=Homo sapiens GN=RAB14 PE=1 SV=4 - [RAB14\_HUMAN]  
Q9NTK5 Obg-like ATPase 1 OS=Homo sapiens GN=OLA1 PE=1 SV=2 - [OLA1\_HUMAN]  
P62913 60S ribosomal protein L11 OS=Homo sapiens GN=RPL11 PE=1 SV=2 - [RL11\_HUMAN]  
P27635 60S ribosomal protein L10 OS=Homo sapiens GN=RPL10 PE=1 SV=4 - [RL10\_HUMAN]  
P25787 Proteasome subunit alpha type-2 OS=Homo sapiens GN=PSMA2 PE=1 SV=2 - [PSA2\_HUMAN]  
P49368 T-complex protein 1 subunit gamma OS=Homo sapiens GN=CCT3 PE=1 SV=4 - [TCPG\_HUMAN]  
P84098 60S ribosomal protein L19 OS=Homo sapiens GN=RPL19 PE=1 SV=1 - [RL19\_HUMAN]

Q99460 26S proteasome non-ATPase regulatory subunit 1 OS=Homo sapiens GN=PSMD1 PE=1 SV=2 - [PSMD1\_HUMAN]  
 P49755 Transmembrane emp24 domain-containing protein 10 OS=Homo sapiens GN=TMED10 PE=1 SV=2 - [TMEDA\_HUMAN]  
 Q15286 Ras-related protein Rab-35 OS=Homo sapiens GN=RAB35 PE=1 SV=1 - [RAB35\_HUMAN]  
 Q01995 Transgelin OS=Homo sapiens GN=TAGLN PE=1 SV=4 - [TAGL\_HUMAN]  
 Q9Y678 Coatamer subunit gamma OS=Homo sapiens GN=COPG PE=1 SV=1 - [COPG\_HUMAN]  
 P20340 Ras-related protein Rab-6A OS=Homo sapiens GN=RAB6A PE=1 SV=3 - [RAB6A\_HUMAN]  
 P62753 40S ribosomal protein S6 OS=Homo sapiens GN=RPS6 PE=1 SV=1 - [RS6\_HUMAN]  
 Q00325 Phosphate carrier protein, mitochondrial OS=Homo sapiens GN=SLC25A3 PE=1 SV=2 - [MPCP\_HUMAN]  
 P55884 Eukaryotic translation initiation factor 3 subunit B OS=Homo sapiens GN=EIF3B PE=1 SV=3 - [EIF3B\_HUMAN]  
 P01008 Antithrombin-III OS=Homo sapiens GN=SERPINC1 PE=1 SV=1 - [ANT3\_HUMAN]  
 Q13126 S-methyl-5'-thioadenosine phosphorylase OS=Homo sapiens GN=MTAP PE=1 SV=2 - [MTAP\_HUMAN]  
 Q13011 Delta(3,5)-Delta(2,4)-dienoyl-CoA isomerase, mitochondrial OS=Homo sapiens GN=ECH1 PE=1 SV=2 - [ECH1\_HUMAN]  
 P62244 40S ribosomal protein S15a OS=Homo sapiens GN=RPS15A PE=1 SV=2 - [RS15A\_HUMAN]  
 P43243 Matrin-3 OS=Homo sapiens GN=MATR3 PE=1 SV=2 - [MATR3\_HUMAN]  
 P26599 Polypyrimidine tract-binding protein 1 OS=Homo sapiens GN=PTBP1 PE=1 SV=1 - [PTBP1\_HUMAN]  
 P13489 Ribonuclease inhibitor OS=Homo sapiens GN=RNH1 PE=1 SV=2 - [RINI\_HUMAN]  
 P35222 Catenin beta-1 OS=Homo sapiens GN=CTNNB1 PE=1 SV=1 - [CTNB1\_HUMAN]  
 P50502 Hsc70-interacting protein OS=Homo sapiens GN=ST13 PE=1 SV=2 - [F10A1\_HUMAN]  
 P25788 Proteasome subunit alpha type-3 OS=Homo sapiens GN=PSMA3 PE=1 SV=2 - [PSA3\_HUMAN]  
 P18621 60S ribosomal protein L17 OS=Homo sapiens GN=RPL17 PE=1 SV=3 - [RL17\_HUMAN]  
 Q9ULV4 Coronin-1C OS=Homo sapiens GN=CORO1C PE=1 SV=1 - [COR1C\_HUMAN]  
 Q9POL0 Vesicle-associated membrane protein-associated protein A OS=Homo sapiens GN=VAPA PE=1 SV=3 - [VAPA\_HUMAN]  
 P61604 10 kDa heat shock protein, mitochondrial OS=Homo sapiens GN=HSPE1 PE=1 SV=2 - [CH10\_HUMAN]  
 P01040 Cystatin-A OS=Homo sapiens GN=CSTA PE=1 SV=1 - [CYTA\_HUMAN]  
 P39656 Dolichyl-diphosphooligosaccharide--protein glycosyltransferase 48 kDa subunit OS=Homo sapiens GN=DDOST PE=1 SV=4  
 Q92597 Protein NDRG1 OS=Homo sapiens GN=NDRG1 PE=1 SV=1 - [NDRG1\_HUMAN]  
 Q13162 Peroxiredoxin-4 OS=Homo sapiens GN=PRDX4 PE=1 SV=1 - [PRDX4\_HUMAN]  
 P62906 60S ribosomal protein L10a OS=Homo sapiens GN=RPL10A PE=1 SV=2 - [RL10A\_HUMAN]  
 Q9BSJ8 Extended synaptotagmin-1 OS=Homo sapiens GN=ESYT1 PE=1 SV=1 - [ESYT1\_HUMAN]  
 Q9Y266 Nuclear migration protein nudC OS=Homo sapiens GN=NUDC PE=1 SV=1 - [NUDC\_HUMAN]  
 P45880 Voltage-dependent anion-selective channel protein 2 OS=Homo sapiens GN=VDAC2 PE=1 SV=2 - [VDAC2\_HUMAN]  
 P18510 Interleukin-1 receptor antagonist protein OS=Homo sapiens GN=IL1RN PE=1 SV=1 - [IL1RA\_HUMAN]  
 O14818 Proteasome subunit alpha type-7 OS=Homo sapiens GN=PSMA7 PE=1 SV=1 - [PSA7\_HUMAN]  
 Q14764 Major vault protein OS=Homo sapiens GN=MVP PE=1 SV=4 - [MVP\_HUMAN]  
 Q96FW1 Ubiquitin thioesterase OTUB1 OS=Homo sapiens GN=OTUB1 PE=1 SV=2 - [OTUB1\_HUMAN]  
 O75083 WD repeat-containing protein 1 OS=Homo sapiens GN=WDR1 PE=1 SV=4 - [WDR1\_HUMAN]  
 P15374 Ubiquitin carboxyl-terminal hydrolase isozyme L3 OS=Homo sapiens GN=UCHL3 PE=1 SV=1 - [UCHL3\_HUMAN]  
 P30086 Phosphatidylethanolamine-binding protein 1 OS=Homo sapiens GN=PEBP1 PE=1 SV=3 - [PEBP1\_HUMAN]  
 P61160 Actin-related protein 2 OS=Homo sapiens GN=ACTR2 PE=1 SV=1 - [ARP2\_HUMAN]  
 P62158 Calmodulin OS=Homo sapiens GN=CALM1 PE=1 SV=2 - [CALM\_HUMAN]  
 P59998 Actin-related protein 2/3 complex subunit 4 OS=Homo sapiens GN=ARPC4 PE=1 SV=3 - [ARPC4\_HUMAN]  
 P16070 CD44 antigen OS=Homo sapiens GN=CD44 PE=1 SV=3 - [CD44\_HUMAN]  
 P51991 Heterogeneous nuclear ribonucleoprotein A3 OS=Homo sapiens GN=HNRNPA3 PE=1 SV=2 - [ROA3\_HUMAN]  
 Q04837 Single-stranded DNA-binding protein, mitochondrial OS=Homo sapiens GN=SSBP1 PE=1 SV=1 - [SSBP\_HUMAN]  
 Q01105 Protein SET OS=Homo sapiens GN=SET PE=1 SV=3 - [SET\_HUMAN]  
 Q15155 Nodal modulator 1 OS=Homo sapiens GN=NOMO1 PE=1 SV=5 - [NOMO1\_HUMAN]  
 P08133 Annexin A6 OS=Homo sapiens GN=ANXA6 PE=1 SV=3 - [ANXA6\_HUMAN]  
 P28070 Proteasome subunit beta type-4 OS=Homo sapiens GN=PSMB4 PE=1 SV=4 - [PSB4\_HUMAN]  
 A8K2U0 Alpha-2-macroglobulin-like protein 1 OS=Homo sapiens GN=A2ML1 PE=1 SV=3 - [A2ML1\_HUMAN]  
 O15145 Actin-related protein 2/3 complex subunit 3 OS=Homo sapiens GN=ARPC3 PE=1 SV=3 - [ARPC3\_HUMAN]  
 Q93008 Probable ubiquitin carboxyl-terminal hydrolase FAF-X OS=Homo sapiens GN=USP9X PE=1 SV=3 - [USP9X\_HUMAN]  
 O00764 Pyridoxal kinase OS=Homo sapiens GN=PDCK PE=1 SV=1 - [PDCK\_HUMAN]  
 P51572 B-cell receptor-associated protein 31 OS=Homo sapiens GN=BCAP31 PE=1 SV=3 - [BAP31\_HUMAN]  
 Q06323 Proteasome activator complex subunit 1 OS=Homo sapiens GN=PSME1 PE=1 SV=1 - [PSME1\_HUMAN]  
 Q13283 Ras GTPase-activating protein-binding protein 1 OS=Homo sapiens GN=G3BP1 PE=1 SV=1 - [G3BP1\_HUMAN]  
 P50995 Annexin A11 OS=Homo sapiens GN=ANXA11 PE=1 SV=1 - [ANX11\_HUMAN]  
 Q13263 Transcription intermediary factor 1-beta OS=Homo sapiens GN=TRIM28 PE=1 SV=5 - [TIF1B\_HUMAN]  
 Q92896 Golgi apparatus protein 1 OS=Homo sapiens GN=GLG1 PE=1 SV=2 - [GSLG1\_HUMAN]

Q99536 Synaptic vesicle membrane protein VAT-1 homolog OS=Homo sapiens GN=VAT1 PE=1 SV=2 - [VAT1\_HUMAN]  
Q13561 Dynactin subunit 2 OS=Homo sapiens GN=DCTN2 PE=1 SV=4 - [DCTN2\_HUMAN]  
P28066 Proteasome subunit alpha type-5 OS=Homo sapiens GN=PSMA5 PE=1 SV=3 - [PSA5\_HUMAN]  
P62826 GTP-binding nuclear protein Ran OS=Homo sapiens GN=RAN PE=1 SV=3 - [RAN\_HUMAN]  
Q14108 Lysosome membrane protein 2 OS=Homo sapiens GN=SCARB2 PE=1 SV=2 - [SCRB2\_HUMAN]  
Q99497 Protein DJ-1 OS=Homo sapiens GN=PARK7 PE=1 SV=2 - [PARK7\_HUMAN]  
P61019 Ras-related protein Rab-2A OS=Homo sapiens GN=RAB2A PE=1 SV=1 - [RAB2A\_HUMAN]  
P20700 Lamin-B1 OS=Homo sapiens GN=LMNB1 PE=1 SV=2 - [LMNB1\_HUMAN]  
Q96CX2 BTB/POZ domain-containing protein KCTD12 OS=Homo sapiens GN=KCTD12 PE=1 SV=1 - [KCD12\_HUMAN]  
Q9P2E9 Ribosome-binding protein 1 OS=Homo sapiens GN=RRBP1 PE=1 SV=4 - [RRBP1\_HUMAN]  
P00505 Aspartate aminotransferase, mitochondrial OS=Homo sapiens GN=GOT2 PE=1 SV=3 - [AATM\_HUMAN]  
P35221 Catenin alpha-1 OS=Homo sapiens GN=CTNNA1 PE=1 SV=1 - [CTNA1\_HUMAN]  
P0C0L4 Complement C4-A OS=Homo sapiens GN=C4A PE=1 SV=1 - [CO4A\_HUMAN]  
P62277 40S ribosomal protein S13 OS=Homo sapiens GN=RPS13 PE=1 SV=2 - [RS13\_HUMAN]  
P07476 Involucrin OS=Homo sapiens GN=IVL PE=1 SV=2 - [INVO\_HUMAN]  
P40227 T-complex protein 1 subunit zeta OS=Homo sapiens GN=CCT6A PE=1 SV=3 - [TCPZ\_HUMAN]  
O43396 Thioredoxin-like protein 1 OS=Homo sapiens GN=TXNL1 PE=1 SV=3 - [TXNL1\_HUMAN]  
P62081 40S ribosomal protein S7 OS=Homo sapiens GN=RPS7 PE=1 SV=1 - [RS7\_HUMAN]  
Q92499 ATP-dependent RNA helicase DDX1 OS=Homo sapiens GN=DDX1 PE=1 SV=2 - [DDX1\_HUMAN]  
O15144 Actin-related protein 2/3 complex subunit 2 OS=Homo sapiens GN=ARPC2 PE=1 SV=1 - [ARPC2\_HUMAN]  
Q96AG4 Leucine-rich repeat-containing protein 59 OS=Homo sapiens GN=LRR59 PE=1 SV=1 - [LRC59\_HUMAN]  
P83731 60S ribosomal protein L24 OS=Homo sapiens GN=RPL24 PE=1 SV=1 - [RL24\_HUMAN]  
Q08170 Serine/arginine-rich splicing factor 4 OS=Homo sapiens GN=SRSF4 PE=1 SV=2 - [SRSF4\_HUMAN]  
Q13510 Acid ceramidase OS=Homo sapiens GN=ASAH1 PE=1 SV=5 - [ASAH1\_HUMAN]  
P62829 60S ribosomal protein L23 OS=Homo sapiens GN=RPL23 PE=1 SV=1 - [RL23\_HUMAN]  
P35268 60S ribosomal protein L22 OS=Homo sapiens GN=RPL22 PE=1 SV=2 - [RL22\_HUMAN]  
P54819 Adenylate kinase 2, mitochondrial OS=Homo sapiens GN=AK2 PE=1 SV=2 - [KAD2\_HUMAN]  
P61224 Ras-related protein Rap-1b OS=Homo sapiens GN=RAP1B PE=1 SV=1 - [RAP1B\_HUMAN]  
P49720 Proteasome subunit beta type-3 OS=Homo sapiens GN=PSMB3 PE=1 SV=2 - [PSB3\_HUMAN]  
P11233 Ras-related protein Ral-A OS=Homo sapiens GN=RALA PE=1 SV=1 - [RALA\_HUMAN]  
P61158 Actin-related protein 3 OS=Homo sapiens GN=ACTR3 PE=1 SV=3 - [ARP3\_HUMAN]  
Q6NZ12 Polymerase I and transcript release factor OS=Homo sapiens GN=PTRF PE=1 SV=1 - [PTRF\_HUMAN]  
P62888 60S ribosomal protein L30 OS=Homo sapiens GN=RPL30 PE=1 SV=2 - [RL30\_HUMAN]  
P40429 60S ribosomal protein L13a OS=Homo sapiens GN=RPL13A PE=1 SV=2 - [RL13A\_HUMAN]  
P61088 Ubiquitin-conjugating enzyme E2 N OS=Homo sapiens GN=UBE2N PE=1 SV=1 - [UBE2N\_HUMAN]  
P48047 ATP synthase subunit O, mitochondrial OS=Homo sapiens GN=ATP5O PE=1 SV=1 - [ATPO\_HUMAN]  
O00159 Myosin-Ic OS=Homo sapiens GN=MYO1C PE=1 SV=4 - [MYO1C\_HUMAN]  
Q08257 Quinone oxidoreductase OS=Homo sapiens GN=CRYZ PE=1 SV=1 - [QOR\_HUMAN]  
Q9UHB9 Signal recognition particle 68 kDa protein OS=Homo sapiens GN=SRP68 PE=1 SV=2 - [SRP68\_HUMAN]  
P62491 Ras-related protein Rab-11A OS=Homo sapiens GN=RAB11A PE=1 SV=3 - [RB11A\_HUMAN]  
P15941 Mucin-1 OS=Homo sapiens GN=MUC1 PE=1 SV=3 - [MUC1\_HUMAN]  
P00441 Superoxide dismutase [Cu-Zn] OS=Homo sapiens GN=SOD1 PE=1 SV=2 - [SODC\_HUMAN]  
P63208 S-phase kinase-associated protein 1 OS=Homo sapiens GN=SKP1 PE=1 SV=2 - [SKP1\_HUMAN]  
Q10567 AP-1 complex subunit beta-1 OS=Homo sapiens GN=AP1B1 PE=1 SV=2 - [AP1B1\_HUMAN]  
P05452 Tetranectin OS=Homo sapiens GN=CLEC3B PE=1 SV=3 - [TETN\_HUMAN]  
P62854 40S ribosomal protein S26 OS=Homo sapiens GN=RPS26 PE=1 SV=3 - [RS26\_HUMAN]  
Q14624 Inter-alpha-trypsin inhibitor heavy chain H4 OS=Homo sapiens GN=ITIH4 PE=1 SV=4 - [ITIH4\_HUMAN]  
Q9Y5S9 RNA-binding protein 8A OS=Homo sapiens GN=RBM8A PE=1 SV=1 - [RBM8A\_HUMAN]  
P47755 F-actin-capping protein subunit alpha-2 OS=Homo sapiens GN=CAPZA2 PE=1 SV=3 - [CAZA2\_HUMAN]  
O95171 Sciellin OS=Homo sapiens GN=SCEL PE=1 SV=2 - [SCEL\_HUMAN]  
P62140 Serine/threonine-protein phosphatase PP1-beta catalytic subunit OS=Homo sapiens GN=PPP1CB PE=1 SV=3  
P05455 Lupus La protein OS=Homo sapiens GN=SSB PE=1 SV=2 - [LA\_HUMAN]  
O43242 26S proteasome non-ATPase regulatory subunit 3 OS=Homo sapiens GN=PSMD3 PE=1 SV=2 - [PSMD3\_HUMAN]  
O75976 Carboxypeptidase D OS=Homo sapiens GN=CPD PE=1 SV=2 - [CBPD\_HUMAN]  
P99999 Cytochrome c OS=Homo sapiens GN=CYCS PE=1 SV=2 - [CYC\_HUMAN]  
O75390 Citrate synthase, mitochondrial OS=Homo sapiens GN=CS PE=1 SV=2 - [CISY\_HUMAN]  
P98160 Basement membrane-specific heparan sulfate proteoglycan core protein OS=Homo sapiens GN=HSPG2 PE=1 SV=4  
P38606 V-type proton ATPase catalytic subunit A OS=Homo sapiens GN=ATP6V1A PE=1 SV=2 - [VATA\_HUMAN]



075396 Vesicle-trafficking protein SEC22b OS=Homo sapiens GN=SEC22B PE=1 SV=4 - [SC22B\_HUMAN]  
 Q92688 Acidic leucine-rich nuclear phosphoprotein 32 family member B OS=Homo sapiens GN=ANP32B PE=1 SV=1  
 Q04637 Eukaryotic translation initiation factor 4 gamma 1 OS=Homo sapiens GN=EIF4G1 PE=1 SV=4 - [IF4G1\_HUMAN]  
 P67812 Signal peptidase complex catalytic subunit SEC11A OS=Homo sapiens GN=SEC11A PE=1 SV=1 - [SC11A\_HUMAN]  
 P60900 Proteasome subunit alpha type-6 OS=Homo sapiens GN=PSMA6 PE=1 SV=1 - [PSA6\_HUMAN]  
 Q9Y281 Cofilin-2 OS=Homo sapiens GN=CFL2 PE=1 SV=1 - [COF2\_HUMAN]  
 Q16698 2,4-dienoyl-CoA reductase, mitochondrial OS=Homo sapiens GN=DECR1 PE=1 SV=1 - [DECR\_HUMAN]  
 P57088 Transmembrane protein 33 OS=Homo sapiens GN=TMEM33 PE=1 SV=2 - [TMM33\_HUMAN]  
 P05534 HLA class I histocompatibility antigen, A-24 alpha chain OS=Homo sapiens GN=HLA-A PE=1 SV=2 - [1A24\_HUMAN]  
 P40939 Trifunctional enzyme subunit alpha, mitochondrial OS=Homo sapiens GN=HADHA PE=1 SV=2 - [ECHA\_HUMAN]  
 P20962 Parathyrosin OS=Homo sapiens GN=PTMS PE=1 SV=2 - [PTMS\_HUMAN]  
 P53618 Coatomer subunit beta OS=Homo sapiens GN=COPB1 PE=1 SV=3 - [COPB\_HUMAN]  
 A0AVT1 Ubiquitin-like modifier-activating enzyme 6 OS=Homo sapiens GN=UBA6 PE=1 SV=1 - [UBA6\_HUMAN]  
 Q14134 Tripartite motif-containing protein 29 OS=Homo sapiens GN=TRIM29 PE=1 SV=2 - [TRI29\_HUMAN]  
 Q15819 Ubiquitin-conjugating enzyme E2 variant 2 OS=Homo sapiens GN=UBE2V2 PE=1 SV=4 - [UB2V2\_HUMAN]  
 Q04760 Lactoylglutathione lyase OS=Homo sapiens GN=GLO1 PE=1 SV=4 - [LGUL\_HUMAN]  
 P13804 Electron transfer flavoprotein subunit alpha, mitochondrial OS=Homo sapiens GN=ETFA PE=1 SV=1 - [ETFA\_HUMAN]  
 O00469 Procollagen-lysine,2-oxoglutarate 5-dioxygenase 2 OS=Homo sapiens GN=PLOD2 PE=1 SV=2 - [PLOD2\_HUMAN]  
 Q15836 Vesicle-associated membrane protein 3 OS=Homo sapiens GN=VAMP3 PE=1 SV=3 - [VAMP3\_HUMAN]  
 Q15233 Non-POU domain-containing octamer-binding protein OS=Homo sapiens GN=NONO PE=1 SV=4 - [NONO\_HUMAN]  
 Q96QK1 Vacuolar protein sorting-associated protein 35 OS=Homo sapiens GN=VPS35 PE=1 SV=2 - [VPS35\_HUMAN]  
 P07686 Beta-hexosaminidase subunit beta OS=Homo sapiens GN=HEXB PE=1 SV=3 - [HEXB\_HUMAN]  
 P40925 Malate dehydrogenase, cytoplasmic OS=Homo sapiens GN=MDH1 PE=1 SV=4 - [MDHC\_HUMAN]  
 Q13751 Laminin subunit beta-3 OS=Homo sapiens GN=LAMB3 PE=1 SV=1 - [LAMB3\_HUMAN]  
 P62851 40S ribosomal protein S25 OS=Homo sapiens GN=RPS25 PE=1 SV=1 - [RS25\_HUMAN]  
 P14550 Alcohol dehydrogenase [NADP+] OS=Homo sapiens GN=AKR1A1 PE=1 SV=3 - [AK1A1\_HUMAN]  
 P11940 Polyadenylate-binding protein 1 OS=Homo sapiens GN=PABPC1 PE=1 SV=2 - [PABP1\_HUMAN]  
 P62847 40S ribosomal protein S24 OS=Homo sapiens GN=RPS24 PE=1 SV=1 - [RS24\_HUMAN]  
 P07814 Bifunctional aminoacyl-tRNA synthetase OS=Homo sapiens GN=EPRS PE=1 SV=5 - [SYEP\_HUMAN]  
 P61254 60S ribosomal protein L26 OS=Homo sapiens GN=RPL26 PE=1 SV=1 - [RL26\_HUMAN]  
 Q9UHV9 Prefoldin subunit 2 OS=Homo sapiens GN=PFDN2 PE=1 SV=1 - [PFD2\_HUMAN]  
 P22695 Cytochrome b-c1 complex subunit 2, mitochondrial OS=Homo sapiens GN=UQCRC2 PE=1 SV=3 - [QCR2\_HUMAN]  
 P12004 Proliferating cell nuclear antigen OS=Homo sapiens GN=PCNA PE=1 SV=1 - [PCNA\_HUMAN]  
 P20618 Proteasome subunit beta type-1 OS=Homo sapiens GN=PSMB1 PE=1 SV=2 - [PSB1\_HUMAN]  
 P62263 40S ribosomal protein S14 OS=Homo sapiens GN=RPS14 PE=1 SV=3 - [RS14\_HUMAN]  
 Q6P2Q9 Pre-mRNA-processing-splicing factor 8 OS=Homo sapiens GN=PRPF8 PE=1 SV=2 - [PRP8\_HUMAN]  
 O00264 Membrane-associated progesterone receptor component 1 OS=Homo sapiens GN=PGRMC1 PE=1 SV=3  
 P40261 Nicotinamide N-methyltransferase OS=Homo sapiens GN=NNMT PE=1 SV=1 - [NNMT\_HUMAN]  
 Q16836 Hydroxyacyl-coenzyme A dehydrogenase, mitochondrial OS=Homo sapiens GN=HADH PE=1 SV=3 - [HCDH\_HUMAN]  
 P62714 Serine/threonine-protein phosphatase 2A catalytic subunit beta isoform OS=Homo sapiens GN=PPP2CB PE=1 SV=1  
 P54578 Ubiquitin carboxyl-terminal hydrolase 14 OS=Homo sapiens GN=USP14 PE=1 SV=3 - [UBP14\_HUMAN]  
 P46778 60S ribosomal protein L21 OS=Homo sapiens GN=RPL21 PE=1 SV=2 - [RL21\_HUMAN]  
 Q14126 Desmoglein-2 OS=Homo sapiens GN=DSG2 PE=1 SV=2 - [DSG2\_HUMAN]  
 Q9Y696 Chloride intracellular channel protein 4 OS=Homo sapiens GN=CLIC4 PE=1 SV=4 - [CLIC4\_HUMAN]  
 O00429 Dynamin-1-like protein OS=Homo sapiens GN=DNM1L PE=1 SV=2 - [DNM1L\_HUMAN]  
 P24539 ATP synthase subunit b, mitochondrial OS=Homo sapiens GN=ATP5F1 PE=1 SV=2 - [AT5F1\_HUMAN]  
 Q12905 Interleukin enhancer-binding factor 2 OS=Homo sapiens GN=ILF2 PE=1 SV=2 - [ILF2\_HUMAN]  
 P62316 Small nuclear ribonucleoprotein Sm D2 OS=Homo sapiens GN=SNRPD2 PE=1 SV=1 - [SMD2\_HUMAN]  
 P48735 Isocitrate dehydrogenase [NADP], mitochondrial OS=Homo sapiens GN=IDH2 PE=1 SV=2 - [IDHP\_HUMAN]  
 Q5VYK3 Proteasome-associated protein ECM29 homolog OS=Homo sapiens GN=ECM29 PE=1 SV=2 - [ECM29\_HUMAN]  
 P62266 40S ribosomal protein S23 OS=Homo sapiens GN=RPS23 PE=1 SV=3 - [RS23\_HUMAN]  
 P47929 Galectin-7 OS=Homo sapiens GN=LGALS7 PE=1 SV=2 - [LEG7\_HUMAN]  
 O75947 ATP synthase subunit d, mitochondrial OS=Homo sapiens GN=ATP5H PE=1 SV=3 - [ATP5H\_HUMAN]  
 P52434 DNA-directed RNA polymerases I, II, and III subunit RPABC3 OS=Homo sapiens GN=POLR2H PE=1 SV=4  
 Q99436 Proteasome subunit beta type-7 OS=Homo sapiens GN=PSMB7 PE=1 SV=1 - [PSB7\_HUMAN]  
 P15121 Aldose reductase OS=Homo sapiens GN=AKR1B1 PE=1 SV=3 - [ALDR\_HUMAN]  
 P53396 ATP-citrate synthase OS=Homo sapiens GN=ACLY PE=1 SV=3 - [ACLY\_HUMAN]  
 Q9H299 SH3 domain-binding glutamic acid-rich-like protein 3 OS=Homo sapiens GN=SH3BGL3 PE=1 SV=1 - [SH3L3\_HUMAN]

P55209 Nucleosome assembly protein 1-like 1 OS=Homo sapiens GN=NAP1L1 PE=1 SV=1 - [NP1L1\_HUMAN]  
 P53999 Activated RNA polymerase II transcriptional coactivator p15 OS=Homo sapiens GN=SUB1 PE=1 SV=3 - [TCP4\_HUMAN]  
 O95336 6-phosphogluconolactonase OS=Homo sapiens GN=PGLS PE=1 SV=2 - [6PGL\_HUMAN]  
 P62750 60S ribosomal protein L23a OS=Homo sapiens GN=RPL23A PE=1 SV=1 - [RL23A\_HUMAN]  
 P20339 Ras-related protein Rab-5A OS=Homo sapiens GN=RAB5A PE=1 SV=2 - [RAB5A\_HUMAN]  
 Q99729 Heterogeneous nuclear ribonucleoprotein A/B OS=Homo sapiens GN=HNRNPAB PE=1 SV=2 - [ROAA\_HUMAN]  
 Q9Y3F4 Serine-threonine kinase receptor-associated protein OS=Homo sapiens GN=STRAP PE=1 SV=1 - [STRAP\_HUMAN]  
 Q14914 Prostaglandin reductase 1 OS=Homo sapiens GN=PTGR1 PE=1 SV=2 - [PTGR1\_HUMAN]  
 O43390 Heterogeneous nuclear ribonucleoprotein R OS=Homo sapiens GN=HNRNPR PE=1 SV=1 - [HNRPR\_HUMAN]  
 Q15631 Translin OS=Homo sapiens GN=TSN PE=1 SV=1 - [TSN\_HUMAN]  
 P43307 Translocon-associated protein subunit alpha OS=Homo sapiens GN=SSR1 PE=1 SV=3 - [SSRA\_HUMAN]  
 P46776 60S ribosomal protein L27a OS=Homo sapiens GN=RPL27A PE=1 SV=2 - [RL27A\_HUMAN]  
 P18077 60S ribosomal protein L35a OS=Homo sapiens GN=RPL35A PE=1 SV=2 - [RL35A\_HUMAN]  
 P14174 Macrophage migration inhibitory factor OS=Homo sapiens GN=MIF PE=1 SV=4 - [MIF\_HUMAN]  
 P12268 Inosine-5'-monophosphate dehydrogenase 2 OS=Homo sapiens GN=IMPDH2 PE=1 SV=2 - [IMDH2\_HUMAN]  
 P39687 Acidic leucine-rich nuclear phosphoprotein 32 family member A OS=Homo sapiens GN=ANP32A PE=1 SV=1  
 O60218 Aldo-keto reductase family 1 member B10 OS=Homo sapiens GN=AKR1B10 PE=1 SV=2 - [AK1BA\_HUMAN]  
 O75643 U5 small nuclear ribonucleoprotein 200 kDa helicase OS=Homo sapiens GN=SNRNP200 PE=1 SV=2 - [U520\_HUMAN]  
 O15511 Actin-related protein 2/3 complex subunit 5 OS=Homo sapiens GN=ARPC5 PE=1 SV=3 - [ARPC5\_HUMAN]  
 O75368 SH3 domain-binding glutamic acid-rich-like protein OS=Homo sapiens GN=SH3BGR1 PE=1 SV=1 - [SH3L1\_HUMAN]  
 Q99715 Collagen alpha-1(XII) chain OS=Homo sapiens GN=COL12A1 PE=1 SV=2 - [COCA1\_HUMAN]  
 P26006 Integrin alpha-3 OS=Homo sapiens GN=ITGA3 PE=1 SV=5 - [ITA3\_HUMAN]  
 Q16543 Hsp90 co-chaperone Cdc37 OS=Homo sapiens GN=CDC37 PE=1 SV=1 - [CDC37\_HUMAN]  
 Q12906 Interleukin enhancer-binding factor 3 OS=Homo sapiens GN=ILF3 PE=1 SV=3 - [ILF3\_HUMAN]  
 P09488 Glutathione S-transferase Mu 1 OS=Homo sapiens GN=GSTM1 PE=1 SV=3 - [GSTM1\_HUMAN]  
 Q9HAV7 GrpE protein homolog 1, mitochondrial OS=Homo sapiens GN=GRPEL1 PE=1 SV=2 - [GRPE1\_HUMAN]  
 Q02218 2-oxoglutarate dehydrogenase, mitochondrial OS=Homo sapiens GN=OGDH PE=1 SV=3 - [ODO1\_HUMAN]  
 P46779 60S ribosomal protein L28 OS=Homo sapiens GN=RPL28 PE=1 SV=3 - [RL28\_HUMAN]  
 P27708 CAD protein OS=Homo sapiens GN=CAD PE=1 SV=3 - [PYR1\_HUMAN]  
 P49411 Elongation factor Tu, mitochondrial OS=Homo sapiens GN=TUFM PE=1 SV=2 - [EFTU\_HUMAN]  
 Q9BUL8 Programmed cell death protein 10 OS=Homo sapiens GN=PDCD10 PE=1 SV=1 - [PDC10\_HUMAN]  
 P61289 Proteasome activator complex subunit 3 OS=Homo sapiens GN=PSME3 PE=1 SV=1 - [PSME3\_HUMAN]  
 O94979 Protein transport protein Sec31A OS=Homo sapiens GN=SEC31A PE=1 SV=3 - [SC31A\_HUMAN]  
 P04899 Guanine nucleotide-binding protein G(i) subunit alpha-2 OS=Homo sapiens GN=GNAI2 PE=1 SV=3 - [GNAI2\_HUMAN]  
 Q5JRX3 Presequence protease, mitochondrial OS=Homo sapiens GN=PITRM1 PE=1 SV=2 - [PREP\_HUMAN]  
 P11678 Eosinophil peroxidase OS=Homo sapiens GN=EPX PE=1 SV=2 - [PERE\_HUMAN]  
 Q99832 T-complex protein 1 subunit eta OS=Homo sapiens GN=CCT7 PE=1 SV=2 - [TCPH\_HUMAN]  
 Q53FA7 Quinone oxidoreductase PIG3 OS=Homo sapiens GN=TP53I3 PE=1 SV=2 - [QORX\_HUMAN]  
 P58546 Myotrophin OS=Homo sapiens GN=MTPN PE=1 SV=2 - [MTPN\_HUMAN]  
 Q9NZM1 Myoferlin OS=Homo sapiens GN=MYOF PE=1 SV=1 - [MYOF\_HUMAN]  
 Q00765 Receptor expression-enhancing protein 5 OS=Homo sapiens GN=REEP5 PE=1 SV=3 - [REEP5\_HUMAN]  
 Q9Y3U8 60S ribosomal protein L36 OS=Homo sapiens GN=RPL36 PE=1 SV=3 - [RL36\_HUMAN]  
 Q02543 60S ribosomal protein L18a OS=Homo sapiens GN=RPL18A PE=1 SV=2 - [RL18A\_HUMAN]  
 Q13347 Eukaryotic translation initiation factor 3 subunit I OS=Homo sapiens GN=EIF3I PE=1 SV=1 - [EIF3I\_HUMAN]  
 Q9BWD1 Acetyl-CoA acetyltransferase, cytosolic OS=Homo sapiens GN=ACAT2 PE=1 SV=2 - [THIC\_HUMAN]  
 P31151 Protein S100-A7 OS=Homo sapiens GN=S100A7 PE=1 SV=4 - [S10A7\_HUMAN]  
 P00403 Cytochrome c oxidase subunit 2 OS=Homo sapiens GN=MT-CO2 PE=1 SV=1 - [COX2\_HUMAN]  
 Q8IVT2 Uncharacterized protein C19orf21 OS=Homo sapiens GN=C19orf21 PE=1 SV=1 - [CS021\_HUMAN]  
 P23229 Integrin alpha-6 OS=Homo sapiens GN=ITGA6 PE=1 SV=4 - [ITA6\_HUMAN]  
 O43169 Cytochrome b5 type B OS=Homo sapiens GN=CYB5B PE=1 SV=2 - [CYB5B\_HUMAN]  
 Q9NS69 Mitochondrial import receptor subunit TOM22 homolog OS=Homo sapiens GN=TOMM22 PE=1 SV=3 - [TOM22\_HUMAN]  
 Q969X5 Endoplasmic reticulum-Golgi intermediate compartment protein 1 OS=Homo sapiens GN=ERGIC1 PE=1 SV=1  
 O95865 N(G),N(G)-dimethylarginine dimethylaminohydrolase 2 OS=Homo sapiens GN=DDAH2 PE=1 SV=1 - [DDAH2\_HUMAN]  
 Q92616 Translational activator GCN1 OS=Homo sapiens GN=GCN1L1 PE=1 SV=6 - [GCN1L\_HUMAN]  
 P49721 Proteasome subunit beta type-2 OS=Homo sapiens GN=PSMB2 PE=1 SV=1 - [PSB2\_HUMAN]  
 Q9UMD9 Collagen alpha-1(XVII) chain OS=Homo sapiens GN=COL17A1 PE=1 SV=3 - [COHA1\_HUMAN]  
 P32969 60S ribosomal protein L9 OS=Homo sapiens GN=RPL9 PE=1 SV=1 - [RL9\_HUMAN]  
 Q9BVK6 Transmembrane emp24 domain-containing protein 9 OS=Homo sapiens GN=TMED9 PE=1 SV=2 - [TMED9\_HUMAN]

P00918 Carbonic anhydrase 2 OS=Homo sapiens GN=CA2 PE=1 SV=2 - [CAH2\_HUMAN]  
 P01033 Metalloproteinase inhibitor 1 OS=Homo sapiens GN=TIMP1 PE=1 SV=1 - [TIMP1\_HUMAN]  
 O95747 Serine/threonine-protein kinase OSR1 OS=Homo sapiens GN=OSR1 PE=1 SV=1 - [OSR1\_HUMAN]  
 Q9NRV9 Heme-binding protein 1 OS=Homo sapiens GN=HEBP1 PE=1 SV=1 - [HEBP1\_HUMAN]  
 O15173 Membrane-associated progesterone receptor component 2 OS=Homo sapiens GN=PGRMC2 PE=1 SV=1  
 Q9UKK9 ADP-sugar pyrophosphatase OS=Homo sapiens GN=NUDT5 PE=1 SV=1 - [NUDT5\_HUMAN]  
 Q15008 26S proteasome non-ATPase regulatory subunit 6 OS=Homo sapiens GN=PSMD6 PE=1 SV=1 - [PSMD6\_HUMAN]  
 Q8WUM4 Programmed cell death 6-interacting protein OS=Homo sapiens GN=PDC6I PE=1 SV=1 - [PDC6I\_HUMAN]  
 P02511 Alpha-crystallin B chain OS=Homo sapiens GN=CRYAB PE=1 SV=2 - [CRYAB\_HUMAN]  
 Q14203 Dynactin subunit 1 OS=Homo sapiens GN=DCTN1 PE=1 SV=3 - [DCTN1\_HUMAN]  
 P46783 40S ribosomal protein S10 OS=Homo sapiens GN=RPS10 PE=1 SV=1 - [RS10\_HUMAN]  
 Q13838 Spliceosome RNA helicase BAT1 OS=Homo sapiens GN=BAT1 PE=1 SV=1 - [UAP56\_HUMAN]  
 P29034 Protein S100-A2 OS=Homo sapiens GN=S100A2 PE=1 SV=3 - [S100A2\_HUMAN]  
 Q32M24 Leucine-rich repeat flightless-interacting protein 1 OS=Homo sapiens GN=LRRFIP1 PE=1 SV=2 - [LRRF1\_HUMAN]  
 P17844 Probable ATP-dependent RNA helicase DDX5 OS=Homo sapiens GN=DDX5 PE=1 SV=1 - [DDX5\_HUMAN]  
 Q96P70 Importin-9 OS=Homo sapiens GN=IPO9 PE=1 SV=3 - [IPO9\_HUMAN]  
 Q9BXJ4 Complement C1q tumor necrosis factor-related protein 3 OS=Homo sapiens GN=C1QTNF3 PE=1 SV=1 - [C1QT3\_HUMAN]  
 Q14789 Golgin subfamily B member 1 OS=Homo sapiens GN=GOLGB1 PE=1 SV=2 - [GOLGB1\_HUMAN]  
 P09429 High mobility group protein B1 OS=Homo sapiens GN=HMGB1 PE=1 SV=3 - [HMGB1\_HUMAN]  
 Q9P246 Stromal interaction molecule 2 OS=Homo sapiens GN=STIM2 PE=1 SV=2 - [STIM2\_HUMAN]  
 P12956 X-ray repair cross-complementing protein 6 OS=Homo sapiens GN=XRCC6 PE=1 SV=2 - [XRCC6\_HUMAN]  
 O15230 Laminin subunit alpha-5 OS=Homo sapiens GN=LAMA5 PE=1 SV=8 - [LAMA5\_HUMAN]  
 O75964 ATP synthase subunit g, mitochondrial OS=Homo sapiens GN=ATP5L PE=1 SV=3 - [ATP5L\_HUMAN]  
 P46782 40S ribosomal protein S5 OS=Homo sapiens GN=RPS5 PE=1 SV=4 - [RS5\_HUMAN]  
 Q03692 Collagen alpha-1(X) chain OS=Homo sapiens GN=COL10A1 PE=1 SV=2 - [COAA1\_HUMAN]  
 P46821 Microtubule-associated protein 1B OS=Homo sapiens GN=MAP1B PE=1 SV=2 - [MAP1B\_HUMAN]  
 Q9UJ70 N-acetyl-D-glucosamine kinase OS=Homo sapiens GN=NAGK PE=1 SV=4 - [NAGK\_HUMAN]  
 P16402 Histone H1.3 OS=Homo sapiens GN=HIST1H1D PE=1 SV=2 - [H13\_HUMAN]  
 P09936 Ubiquitin carboxyl-terminal hydrolase isozyme L1 OS=Homo sapiens GN=UCHL1 PE=1 SV=2 - [UCHL1\_HUMAN]  
 P35998 26S protease regulatory subunit 7 OS=Homo sapiens GN=PSMC2 PE=1 SV=3 - [PRS7\_HUMAN]  
 Q01469 Fatty acid-binding protein, epidermal OS=Homo sapiens GN=FABP5 PE=1 SV=3 - [FABP5\_HUMAN]  
 P45974 Ubiquitin carboxyl-terminal hydrolase 5 OS=Homo sapiens GN=USP5 PE=1 SV=2 - [UBP5\_HUMAN]  
 P30048 Thioredoxin-dependent peroxide reductase, mitochondrial OS=Homo sapiens GN=PRDX3 PE=1 SV=3 - [PRDX3\_HUMAN]  
 P07384 Calpain-1 catalytic subunit OS=Homo sapiens GN=CAPN1 PE=1 SV=1 - [CAN1\_HUMAN]  
 Q16787 Laminin subunit alpha-3 OS=Homo sapiens GN=LAMA3 PE=1 SV=2 - [LAMA3\_HUMAN]  
 Q9UL46 Proteasome activator complex subunit 2 OS=Homo sapiens GN=PSME2 PE=1 SV=4 - [PSME2\_HUMAN]  
 P68036 Ubiquitin-conjugating enzyme E2 L3 OS=Homo sapiens GN=UBE2L3 PE=1 SV=1 - [UB2L3\_HUMAN]  
 P48507 Glutamate-cysteine ligase regulatory subunit OS=Homo sapiens GN=GCLM PE=1 SV=1 - [GSH0\_HUMAN]  
 Q15717 ELAV-like protein 1 OS=Homo sapiens GN=ELAVL1 PE=1 SV=2 - [ELAV1\_HUMAN]  
 O75531 Barrier-to-autointegration factor OS=Homo sapiens GN=BANF1 PE=1 SV=1 - [BAF\_HUMAN]  
 O15143 Actin-related protein 2/3 complex subunit 1B OS=Homo sapiens GN=ARPC1B PE=1 SV=3 - [ARC1B\_HUMAN]  
 O00303 Eukaryotic translation initiation factor 3 subunit F OS=Homo sapiens GN=EIF3F PE=1 SV=1 - [EIF3F\_HUMAN]  
 Q9BRA2 Thioredoxin domain-containing protein 17 OS=Homo sapiens GN=TXNDC17 PE=1 SV=1 - [TXD17\_HUMAN]  
 Q70UQ0 Inhibitor of nuclear factor kappa-B kinase-interacting protein OS=Homo sapiens GN=IKBIP PE=1 SV=1 - [KIP\_HUMAN]  
 Q8TEX9 Importin-4 OS=Homo sapiens GN=IPO4 PE=1 SV=2 - [IPO4\_HUMAN]  
 P80188 Neutrophil gelatinase-associated lipocalin OS=Homo sapiens GN=LCN2 PE=1 SV=2 - [NGAL\_HUMAN]  
 Q9UNM6 26S proteasome non-ATPase regulatory subunit 13 OS=Homo sapiens GN=PSMD13 PE=1 SV=2 - [PSD13\_HUMAN]  
 P56537 Eukaryotic translation initiation factor 6 OS=Homo sapiens GN=EIF6 PE=1 SV=1 - [IF6\_HUMAN]  
 Q3ZCQ8 Mitochondrial import inner membrane translocase subunit TIM50 OS=Homo sapiens GN=TIMM50 PE=1 SV=2  
 P68402 Platelet-activating factor acetylhydrolase IB subunit beta OS=Homo sapiens GN=PAFAH1B2 PE=1 SV=1 - [PA1B2\_HUMAN]  
 Q9Y2B0 Protein canopy homolog 2 OS=Homo sapiens GN=CNPY2 PE=1 SV=1 - [CNPY2\_HUMAN]  
 P61586 Transforming protein RhoA OS=Homo sapiens GN=RHOA PE=1 SV=1 - [RHOA\_HUMAN]  
 Q53GQ0 Estradiol 17-beta-dehydrogenase 12 OS=Homo sapiens GN=HSD17B12 PE=1 SV=2 - [DHB12\_HUMAN]  
 P08708 40S ribosomal protein S17 OS=Homo sapiens GN=RPS17 PE=1 SV=2 - [RS17\_HUMAN]  
 Q15369 Transcription elongation factor B polypeptide 1 OS=Homo sapiens GN=TCEB1 PE=1 SV=1 - [ELOC\_HUMAN]  
 Q15436 Protein transport protein Sec23A OS=Homo sapiens GN=SEC23A PE=1 SV=2 - [SC23A\_HUMAN]  
 O60664 Perilipin-3 OS=Homo sapiens GN=PLIN3 PE=1 SV=3 - [PLIN3\_HUMAN]  
 P10768 S-formylglutathione hydrolase OS=Homo sapiens GN=ESD PE=1 SV=2 - [ESTD\_HUMAN]

P04843 Dolichyl-diphosphooligosaccharide--protein glycosyltransferase subunit 1 OS=Homo sapiens GN=RPN1 PE=1 SV=1  
 Q15404 Ras suppressor protein 1 OS=Homo sapiens GN=RSU1 PE=1 SV=3 - [RSU1\_HUMAN]  
 O00232 26S proteasome non-ATPase regulatory subunit 12 OS=Homo sapiens GN=PSMD12 PE=1 SV=3 - [PSD12\_HUMAN]  
 Q14247 Src substrate cortactin OS=Homo sapiens GN=CTTN PE=1 SV=2 - [SRC8\_HUMAN]  
 Q9UIJ7 GTP:AMP phosphotransferase, mitochondrial OS=Homo sapiens GN=AK3 PE=1 SV=4 - [KAD3\_HUMAN]  
 Q02978 Mitochondrial 2-oxoglutarate/malate carrier protein OS=Homo sapiens GN=SLC25A11 PE=1 SV=3 - [M2OM\_HUMAN]  
 O76094 Signal recognition particle 72 kDa protein OS=Homo sapiens GN=SRP72 PE=1 SV=3 - [SRP72\_HUMAN]  
 P37108 Signal recognition particle 14 kDa protein OS=Homo sapiens GN=SRP14 PE=1 SV=2 - [SRP14\_HUMAN]  
 P36957 Dihydrolipoyllysine-residue succinyltransferase component of 2-oxoglutarate dehydrogenase complex, mitochondrial OS=HS  
 Q07812 Apoptosis regulator BAX OS=Homo sapiens GN=BAX PE=1 SV=1 - [BAX\_HUMAN]  
 P50914 60S ribosomal protein L14 OS=Homo sapiens GN=RPL14 PE=1 SV=4 - [RL14\_HUMAN]  
 Q9Y376 Calcium-binding protein 39 OS=Homo sapiens GN=CAB39 PE=1 SV=1 - [CAB39\_HUMAN]  
 P27695 DNA-(apurinic or apyrimidinic site) lyase OS=Homo sapiens GN=APEX1 PE=1 SV=2 - [APEX1\_HUMAN]  
 Q92734 Protein TFG OS=Homo sapiens GN=TFG PE=1 SV=2 - [TFG\_HUMAN]  
 P09622 Dihydrolipoyl dehydrogenase, mitochondrial OS=Homo sapiens GN=DLD PE=1 SV=2 - [DLDH\_HUMAN]  
 P17987 T-complex protein 1 subunit alpha OS=Homo sapiens GN=TCP1 PE=1 SV=1 - [TCPA\_HUMAN]  
 Q13492 Phosphatidylinositol-binding clathrin assembly protein OS=Homo sapiens GN=PICALM PE=1 SV=2 - [PICAL\_HUMAN]  
 Q14444 Caprin-1 OS=Homo sapiens GN=CAPRIN1 PE=1 SV=2 - [CAPR1\_HUMAN]  
 Q969H8 UPF0556 protein C19orf10 OS=Homo sapiens GN=C19orf10 PE=1 SV=1 - [CS010\_HUMAN]  
 P23634 Plasma membrane calcium-transporting ATPase 4 OS=Homo sapiens GN=ATP2B4 PE=1 SV=2 - [AT2B4\_HUMAN]  
 Q9Y3D6 Mitochondrial fission 1 protein OS=Homo sapiens GN=FIS1 PE=1 SV=2 - [FIS1\_HUMAN]  
 P62314 Small nuclear ribonucleoprotein Sm D1 OS=Homo sapiens GN=SNRPD1 PE=1 SV=1 - [SMD1\_HUMAN]  
 P46977 Dolichyl-diphosphooligosaccharide--protein glycosyltransferase subunit STT3A OS=Homo sapiens GN=STT3A PE=1 SV=2  
 P19971 Thymidine phosphorylase OS=Homo sapiens GN=TYMP PE=1 SV=2 - [TYPH\_HUMAN]  
 Q99733 Nucleosome assembly protein 1-like 4 OS=Homo sapiens GN=NAP1L4 PE=1 SV=1 - [NP1L4\_HUMAN]  
 P62318 Small nuclear ribonucleoprotein Sm D3 OS=Homo sapiens GN=SNRPD3 PE=1 SV=1 - [SMD3\_HUMAN]  
 Q9UQB8 Brain-specific angiogenesis inhibitor 1-associated protein 2 OS=Homo sapiens GN=BAIAP2 PE=1 SV=1 - [BAIP2\_HUMAN]  
 P42126 3,2-trans-enoyl-CoA isomerase, mitochondrial OS=Homo sapiens GN=DCI PE=1 SV=1 - [D3D2\_HUMAN]  
 Q9Y5Z4 Heme-binding protein 2 OS=Homo sapiens GN=HEBP2 PE=1 SV=1 - [HEBP2\_HUMAN]  
 Q01130 Serine/arginine-rich splicing factor 2 OS=Homo sapiens GN=SRSF2 PE=1 SV=4 - [SRSF2\_HUMAN]  
 Q99627 COP9 signalosome complex subunit 8 OS=Homo sapiens GN=COPS8 PE=1 SV=1 - [CSN8\_HUMAN]  
 P06737 Glycogen phosphorylase, liver form OS=Homo sapiens GN=PYGL PE=1 SV=4 - [PYGL\_HUMAN]  
 P22061 Protein-L-isoaspartate(D-aspartate) O-methyltransferase OS=Homo sapiens GN=PCMT1 PE=1 SV=4 - [PIMT\_HUMAN]  
 Q92973 Transportin-1 OS=Homo sapiens GN=TNPO1 PE=1 SV=2 - [TNPO1\_HUMAN]  
 P47985 Cytochrome b-c1 complex subunit Rieske, mitochondrial OS=Homo sapiens GN=UQCRCF1 PE=1 SV=2 - [UCRI\_HUMAN]  
 P53007 Tricarboxylate transport protein, mitochondrial OS=Homo sapiens GN=SLC25A1 PE=1 SV=2 - [TXTP\_HUMAN]  
 Q8N766 Uncharacterized protein KIAA0090 OS=Homo sapiens GN=KIAA0090 PE=1 SV=1 - [K0090\_HUMAN]  
 Q9HDC9 Adipocyte plasma membrane-associated protein OS=Homo sapiens GN=APMAP PE=1 SV=2 - [APMAP\_HUMAN]  
 P24821 Tenascin OS=Homo sapiens GN=TNC PE=1 SV=3 - [TENA\_HUMAN]  
 P29373 Cellular retinoic acid-binding protein 2 OS=Homo sapiens GN=CRABP2 PE=1 SV=2 - [RABP2\_HUMAN]  
 Q9P0S9 Transmembrane protein 14C OS=Homo sapiens GN=TMEM14C PE=1 SV=1 - [TM14C\_HUMAN]  
 P56385 ATP synthase subunit e, mitochondrial OS=Homo sapiens GN=ATP5I PE=1 SV=2 - [ATP5I\_HUMAN]  
 O95832 Claudin-1 OS=Homo sapiens GN=CLDN1 PE=1 SV=1 - [CLD1\_HUMAN]  
 Q99613 Eukaryotic translation initiation factor 3 subunit C OS=Homo sapiens GN=EIF3C PE=1 SV=1 - [EIF3C\_HUMAN]  
 P04844 Dolichyl-diphosphooligosaccharide--protein glycosyltransferase subunit 2 OS=Homo sapiens GN=RPN2 PE=1 SV=3  
 P09758 Tumor-associated calcium signal transducer 2 OS=Homo sapiens GN=TACSTD2 PE=1 SV=3 - [TACD2\_HUMAN]  
 Q961X5 Up-regulated during skeletal muscle growth protein 5 OS=Homo sapiens GN=USMG5 PE=1 SV=1 - [USMG5\_HUMAN]  
 Q9BVC6 Transmembrane protein 109 OS=Homo sapiens GN=TMEM109 PE=1 SV=1 - [TM109\_HUMAN]  
 P61966 AP-1 complex subunit sigma-1A OS=Homo sapiens GN=AP1S1 PE=1 SV=1 - [AP1S1\_HUMAN]  
 P12270 Nucleoprotein TPR OS=Homo sapiens GN=TPR PE=1 SV=3 - [TPR\_HUMAN]  
 P36871 Phosphoglucomutase-1 OS=Homo sapiens GN=PGM1 PE=1 SV=3 - [PGM1\_HUMAN]  
 P06756 Integrin alpha-V OS=Homo sapiens GN=ITGAV PE=1 SV=2 - [ITAV\_HUMAN]  
 Q9NVI7 ATPase family AAA domain-containing protein 3A OS=Homo sapiens GN=ATAD3A PE=1 SV=2 - [ATD3A\_HUMAN]  
 P62280 40S ribosomal protein S11 OS=Homo sapiens GN=RPS11 PE=1 SV=3 - [RS11\_HUMAN]  
 P80723 Brain acid soluble protein 1 OS=Homo sapiens GN=BASP1 PE=1 SV=2 - [BASP1\_HUMAN]  
 P29144 Tripeptidyl-peptidase 2 OS=Homo sapiens GN=TPP2 PE=1 SV=4 - [TPP2\_HUMAN]  
 O95831 Apoptosis-inducing factor 1, mitochondrial OS=Homo sapiens GN=AIFM1 PE=1 SV=1 - [AIFM1\_HUMAN]  
 P50213 Isocitrate dehydrogenase [NAD] subunit alpha, mitochondrial OS=Homo sapiens GN=IDH3A PE=1 SV=1 - [IDH3A\_HUMAN]

P26639 Threonyl-tRNA synthetase, cytoplasmic OS=Homo sapiens GN=TARS PE=1 SV=3 - [SYTC\_HUMAN]  
 Q16891 Mitochondrial inner membrane protein OS=Homo sapiens GN=IMMT PE=1 SV=1 - [IMMT\_HUMAN]  
 P23381 Tryptophanyl-tRNA synthetase, cytoplasmic OS=Homo sapiens GN=WARS PE=1 SV=2 - [SYWC\_HUMAN]  
 Q9NVJ2 ADP-ribosylation factor-like protein 8B OS=Homo sapiens GN=ARL8B PE=1 SV=1 - [ARL8B\_HUMAN]  
 Q14997 Proteasome activator complex subunit 4 OS=Homo sapiens GN=PSME4 PE=1 SV=2 - [PSME4\_HUMAN]  
 Q01844 RNA-binding protein EWS OS=Homo sapiens GN=EWSR1 PE=1 SV=1 - [EWS\_HUMAN]  
 P16615 Sarcoplasmic/endoplasmic reticulum calcium ATPase 2 OS=Homo sapiens GN=ATP2A2 PE=1 SV=1 - [AT2A2\_HUMAN]  
 P24043 Laminin subunit alpha-2 OS=Homo sapiens GN=LAMA2 PE=1 SV=4 - [LAMA2\_HUMAN]  
 Q01813 6-phosphofructokinase type C OS=Homo sapiens GN=PFKP PE=1 SV=2 - [K6PP\_HUMAN]  
 P54920 Alpha-soluble NSF attachment protein OS=Homo sapiens GN=NAPA PE=1 SV=3 - [SNAA\_HUMAN]  
 P53634 Dipeptidyl peptidase 1 OS=Homo sapiens GN=CTSC PE=1 SV=2 - [CATC\_HUMAN]  
 Q63HN8 E3 ubiquitin-protein ligase RNF213 OS=Homo sapiens GN=RNF213 PE=1 SV=3 - [RN213\_HUMAN]  
 P62306 Small nuclear ribonucleoprotein F OS=Homo sapiens GN=SNRPF PE=1 SV=1 - [RUXF\_HUMAN]  
 O14579 Coatamer subunit epsilon OS=Homo sapiens GN=COPE PE=1 SV=3 - [COPE\_HUMAN]  
 P42677 40S ribosomal protein S27 OS=Homo sapiens GN=RPS27 PE=1 SV=3 - [RS27\_HUMAN]  
 P30044 Peroxiredoxin-5, mitochondrial OS=Homo sapiens GN=PRDX5 PE=1 SV=4 - [PRDX5\_HUMAN]  
 Q9NQR4 Omega-amidase NIT2 OS=Homo sapiens GN=NIT2 PE=1 SV=1 - [NIT2\_HUMAN]  
 P14735 Insulin-degrading enzyme OS=Homo sapiens GN=IDE PE=1 SV=4 - [IDE\_HUMAN]  
 P20674 Cytochrome c oxidase subunit 5A, mitochondrial OS=Homo sapiens GN=COX5A PE=1 SV=2 - [COX5A\_HUMAN]  
 P31930 Cytochrome b-c1 complex subunit 1, mitochondrial OS=Homo sapiens GN=UQCRC1 PE=1 SV=3 - [QCR1\_HUMAN]  
 P23246 Splicing factor, proline- and glutamine-rich OS=Homo sapiens GN=SFPQ PE=1 SV=2 - [SFPQ\_HUMAN]  
 Q99471 Prefoldin subunit 5 OS=Homo sapiens GN=PFDN5 PE=1 SV=2 - [PFD5\_HUMAN]  
 Q13151 Heterogeneous nuclear ribonucleoprotein A0 OS=Homo sapiens GN=HNRNPA0 PE=1 SV=1 - [ROA0\_HUMAN]  
 P06703 Protein S100-A6 OS=Homo sapiens GN=S100A6 PE=1 SV=1 - [S10A6\_HUMAN]  
 Q7L576 Cytoplasmic FMR1-interacting protein 1 OS=Homo sapiens GN=CYFIP1 PE=1 SV=1 - [CYFP1\_HUMAN]  
 P60953 Cell division control protein 42 homolog OS=Homo sapiens GN=CDC42 PE=1 SV=2 - [CDC42\_HUMAN]  
 P25789 Proteasome subunit alpha type-4 OS=Homo sapiens GN=PSMA4 PE=1 SV=1 - [PSA4\_HUMAN]  
 P61163 Alpha-centractin OS=Homo sapiens GN=ACTR1A PE=1 SV=1 - [ACTZ\_HUMAN]  
 P11234 Ras-related protein Ral-B OS=Homo sapiens GN=RALB PE=1 SV=1 - [RALB\_HUMAN]  
 Q00341 Vigilin OS=Homo sapiens GN=HDLBP PE=1 SV=2 - [VIGLN\_HUMAN]  
 Q9BRF8 Calcineurin-like phosphoesterase domain-containing protein 1 OS=Homo sapiens GN=CPPED1 PE=1 SV=3  
 Q92900 Regulator of nonsense transcripts 1 OS=Homo sapiens GN=UPF1 PE=1 SV=2 - [RENT1\_HUMAN]  
 P50897 Palmitoyl-protein thioesterase 1 OS=Homo sapiens GN=PPT1 PE=1 SV=1 - [PPT1\_HUMAN]  
 Q9NUQ9 Protein FAM49B OS=Homo sapiens GN=FAM49B PE=1 SV=1 - [FA49B\_HUMAN]  
 P60981 Destrin OS=Homo sapiens GN=DSTN PE=1 SV=3 - [DEST\_HUMAN]  
 O75489 NADH dehydrogenase [ubiquinone] iron-sulfur protein 3, mitochondrial OS=Homo sapiens GN=NDUFS3 PE=1 SV=1  
 P15090 Fatty acid-binding protein, adipocyte OS=Homo sapiens GN=FABP4 PE=1 SV=3 - [FABP4\_HUMAN]  
 Q9Y2Q3 Glutathione S-transferase kappa 1 OS=Homo sapiens GN=GSTK1 PE=1 SV=3 - [GSTK1\_HUMAN]  
 P24390 ER lumen protein retaining receptor 1 OS=Homo sapiens GN=KDEL1 PE=1 SV=1 - [ERD21\_HUMAN]  
 O43847 Nardilysin OS=Homo sapiens GN=NRD1 PE=1 SV=2 - [NRDC\_HUMAN]  
 P62841 40S ribosomal protein S15 OS=Homo sapiens GN=RPS15 PE=1 SV=2 - [RS15\_HUMAN]  
 Q9UBW8 COP9 signalosome complex subunit 7a OS=Homo sapiens GN=COPS7A PE=1 SV=1 - [CSN7A\_HUMAN]  
 P46926 Glucosamine-6-phosphate isomerase 1 OS=Homo sapiens GN=GNPDA1 PE=1 SV=1 - [GNP1\_HUMAN]  
 Q7L2H7 Eukaryotic translation initiation factor 3 subunit M OS=Homo sapiens GN=EIF3M PE=1 SV=1 - [EIF3M\_HUMAN]  
 P52566 Rho GDP-dissociation inhibitor 2 OS=Homo sapiens GN=ARHGDI2 PE=1 SV=3 - [GDIR2\_HUMAN]  
 O14880 Microsomal glutathione S-transferase 3 OS=Homo sapiens GN=MGST3 PE=1 SV=1 - [MGST3\_HUMAN]  
 P55735 Protein SEC13 homolog OS=Homo sapiens GN=SEC13 PE=1 SV=3 - [SEC13\_HUMAN]  
 Q9UIQ6 Leucyl-cystinyl aminopeptidase OS=Homo sapiens GN=LNPEP PE=1 SV=3 - [LCAP\_HUMAN]  
 P55084 Trifunctional enzyme subunit beta, mitochondrial OS=Homo sapiens GN=HADHB PE=1 SV=3 - [ECHB\_HUMAN]  
 O75436 Vacuolar protein sorting-associated protein 26A OS=Homo sapiens GN=VPS26A PE=1 SV=2 - [VP26A\_HUMAN]  
 Q16706 Alpha-mannosidase 2 OS=Homo sapiens GN=MAN2A1 PE=1 SV=2 - [MA2A1\_HUMAN]  
 Q15125 3-beta-hydroxysteroid-Delta(8),Delta(7)-isomerase OS=Homo sapiens GN=EBP PE=1 SV=3 - [EBP\_HUMAN]  
 Q13185 Chromobox protein homolog 3 OS=Homo sapiens GN=CBX3 PE=1 SV=4 - [CBX3\_HUMAN]  
 Q16186 Proteasomal ubiquitin receptor ADRM1 OS=Homo sapiens GN=ADRM1 PE=1 SV=2 - [ADRM1\_HUMAN]  
 P62899 60S ribosomal protein L31 OS=Homo sapiens GN=RPL31 PE=1 SV=1 - [RL31\_HUMAN]  
 Q16181 Septin-7 OS=Homo sapiens GN=SEPT7 PE=1 SV=2 - [SEPT7\_HUMAN]  
 P22307 Non-specific lipid-transfer protein OS=Homo sapiens GN=SCP2 PE=1 SV=2 - [NLTP\_HUMAN]  
 Q15029 116 kDa U5 small nuclear ribonucleoprotein component OS=Homo sapiens GN=EFTUD2 PE=1 SV=1 - [U5S1\_HUMAN]

P00492 Hypoxanthine-guanine phosphoribosyltransferase OS=Homo sapiens GN=HPRT1 PE=1 SV=2 - [HPRT\_HUMAN]  
 P28072 Proteasome subunit beta type-6 OS=Homo sapiens GN=PSMB6 PE=1 SV=4 - [PSB6\_HUMAN]  
 P61513 60S ribosomal protein L37a OS=Homo sapiens GN=RPL37A PE=1 SV=2 - [RL37A\_HUMAN]  
 Q9NR28 Diablo homolog, mitochondrial OS=Homo sapiens GN=DIABLO PE=1 SV=1 - [DBLOH\_HUMAN]  
 Q9HAV4 Exportin-5 OS=Homo sapiens GN=XPO5 PE=1 SV=1 - [XPO5\_HUMAN]  
 Q7Z7H5 Transmembrane emp24 domain-containing protein 4 OS=Homo sapiens GN=TMED4 PE=1 SV=1 - [TMED4\_HUMAN]  
 Q5JTV8 Torsin-1A-interacting protein 1 OS=Homo sapiens GN=TOR1AIP1 PE=1 SV=2 - [TOIP1\_HUMAN]  
 O00487 26S proteasome non-ATPase regulatory subunit 14 OS=Homo sapiens GN=PSMD14 PE=1 SV=1 - [PSDE\_HUMAN]  
 P51665 26S proteasome non-ATPase regulatory subunit 7 OS=Homo sapiens GN=PSMD7 PE=1 SV=2 - [PSD7\_HUMAN]  
 P26640 Valyl-tRNA synthetase OS=Homo sapiens GN=VARS PE=1 SV=4 - [SYVC\_HUMAN]  
 Q14980 Nuclear mitotic apparatus protein 1 OS=Homo sapiens GN=NUMA1 PE=1 SV=2 - [NUMA1\_HUMAN]  
 Q9HC38 Glyoxalase domain-containing protein 4 OS=Homo sapiens GN=GLOD4 PE=1 SV=1 - [GLOD4\_HUMAN]  
 O43809 Cleavage and polyadenylation specificity factor subunit 5 OS=Homo sapiens GN=NUDT21 PE=1 SV=1 - [CPSF5\_HUMAN]  
 O95436 Sodium-dependent phosphate transport protein 2B OS=Homo sapiens GN=SLC34A2 PE=1 SV=3 - [NPT2B\_HUMAN]  
 Q96QD8 Sodium-coupled neutral amino acid transporter 2 OS=Homo sapiens GN=SLC38A2 PE=1 SV=2 - [S38A2\_HUMAN]  
 P61353 60S ribosomal protein L27 OS=Homo sapiens GN=RPL27 PE=1 SV=2 - [RL27\_HUMAN]  
 Q9GZT3 SRA stem-loop-interacting RNA-binding protein, mitochondrial OS=Homo sapiens GN=SLIRP PE=1 SV=1 - [SLIRP\_HUMAN]  
 A5YKK6 CCR4-NOT transcription complex subunit 1 OS=Homo sapiens GN=CNOT1 PE=1 SV=2 - [CNOT1\_HUMAN]  
 P14678 Small nuclear ribonucleoprotein-associated proteins B and B' OS=Homo sapiens GN=SNRNP PE=1 SV=2 - [RSMB\_HUMAN]  
 O75165 DnaJ homolog subfamily C member 13 OS=Homo sapiens GN=DNAJC13 PE=1 SV=5 - [DJC13\_HUMAN]  
 O43324 Eukaryotic translation elongation factor 1 epsilon-1 OS=Homo sapiens GN=EEF1E1 PE=1 SV=1 - [MCA3\_HUMAN]  
 O75145 Liprin-alpha-3 OS=Homo sapiens GN=PPFIA3 PE=1 SV=3 - [LIPA3\_HUMAN]  
 Q9UM54 Myosin-VI OS=Homo sapiens GN=MYO6 PE=1 SV=4 - [MYO6\_HUMAN]  
 P32926 Desmoglein-3 OS=Homo sapiens GN=DSG3 PE=1 SV=2 - [DSG3\_HUMAN]  
 P47897 Glutamyl-tRNA synthetase OS=Homo sapiens GN=QARS PE=1 SV=1 - [SYQ\_HUMAN]  
 Q9UJZ1 Stomatin-like protein 2 OS=Homo sapiens GN=STOML2 PE=1 SV=1 - [STML2\_HUMAN]  
 Q9UHX1 Poly(U)-binding-splicing factor PUF60 OS=Homo sapiens GN=PUF60 PE=1 SV=1 - [PUF60\_HUMAN]  
 P30049 ATP synthase subunit delta, mitochondrial OS=Homo sapiens GN=ATP5D PE=1 SV=2 - [ATPD\_HUMAN]  
 Q16629 Serine/arginine-rich splicing factor 7 OS=Homo sapiens GN=SRSF7 PE=1 SV=1 - [SRSF7\_HUMAN]  
 P17980 26S protease regulatory subunit 6A OS=Homo sapiens GN=PSMC3 PE=1 SV=3 - [PRS6A\_HUMAN]  
 Q9Y5U9 Immediate early response 3-interacting protein 1 OS=Homo sapiens GN=IER3IP1 PE=1 SV=1 - [IR3IP\_HUMAN]  
 Q9NP72 Ras-related protein Rab-18 OS=Homo sapiens GN=RAB18 PE=1 SV=1 - [RAB18\_HUMAN]  
 P41250 Glycyl-tRNA synthetase OS=Homo sapiens GN=GARS PE=1 SV=3 - [SYG\_HUMAN]  
 Q16718 NADH dehydrogenase [ubiquinone] 1 alpha subcomplex subunit 5 OS=Homo sapiens GN=NDUFA5 PE=1 SV=3  
 P62942 Peptidyl-prolyl cis-trans isomerase FKBP1A OS=Homo sapiens GN=FKBP1A PE=1 SV=2 - [FKB1A\_HUMAN]  
 O43592 Exportin-T OS=Homo sapiens GN=XPOT PE=1 SV=2 - [XPOT\_HUMAN]  
 O96000 NADH dehydrogenase [ubiquinone] 1 beta subcomplex subunit 10 OS=Homo sapiens GN=NDUFB10 PE=1 SV=3  
 Q9Y2Q5 Mitogen-activated protein-binding protein-interacting protein OS=Homo sapiens GN=ROBLD3 PE=1 SV=1 - [MAPIP\_HUMAN]  
 P56134 ATP synthase subunit f, mitochondrial OS=Homo sapiens GN=ATP5J2 PE=1 SV=3 - [ATPK\_HUMAN]  
 Q9UBQ7 Glyoxylate reductase/hydroxypyruvate reductase OS=Homo sapiens GN=GRHPR PE=1 SV=1 - [GRHPR\_HUMAN]  
 P13073 Cytochrome c oxidase subunit 4 isoform 1, mitochondrial OS=Homo sapiens GN=COX4I1 PE=1 SV=1 - [COX41\_HUMAN]  
 P14868 Aspartyl-tRNA synthetase, cytoplasmic OS=Homo sapiens GN=DARS PE=1 SV=2 - [SYDC\_HUMAN]  
 O15212 Prefoldin subunit 6 OS=Homo sapiens GN=PFDN6 PE=1 SV=1 - [PFD6\_HUMAN]  
 Q14019 Coactosin-like protein OS=Homo sapiens GN=COTL1 PE=1 SV=3 - [COTL1\_HUMAN]  
 P62495 Eukaryotic peptide chain release factor subunit 1 OS=Homo sapiens GN=ETF1 PE=1 SV=3 - [ERF1\_HUMAN]  
 Q32P28 Prolyl 3-hydroxylase 1 OS=Homo sapiens GN=LEPRE1 PE=1 SV=2 - [P3H1\_HUMAN]  
 P02649 Apolipoprotein E OS=Homo sapiens GN=APOE PE=1 SV=1 - [APOE\_HUMAN]  
 Q9UHD8 Septin-9 OS=Homo sapiens GN=SEPT9 PE=1 SV=2 - [SEPT9\_HUMAN]  
 O15118 Niemann-Pick C1 protein OS=Homo sapiens GN=NPC1 PE=1 SV=2 - [NPC1\_HUMAN]  
 Q9NZJ4 Sacsin OS=Homo sapiens GN=SACS PE=1 SV=2 - [SACS\_HUMAN]  
 Q8WWI1 LIM domain only protein 7 OS=Homo sapiens GN=LMO7 PE=1 SV=3 - [LMO7\_HUMAN]  
 O15260 Surfeit locus protein 4 OS=Homo sapiens GN=SURF4 PE=1 SV=3 - [SURF4\_HUMAN]  
 Q92878 DNA repair protein RAD50 OS=Homo sapiens GN=RAD50 PE=1 SV=1 - [RAD50\_HUMAN]  
 Q9BRX8 UPF0765 protein C10orf58 OS=Homo sapiens GN=C10orf58 PE=1 SV=3 - [CJ058\_HUMAN]  
 Q9Y5L4 Mitochondrial import inner membrane translocase subunit Tim13 OS=Homo sapiens GN=TIMM13 PE=1 SV=1  
 Q08379 Golgin subfamily A member 2 OS=Homo sapiens GN=GOLGA2 PE=1 SV=3 - [GOGA2\_HUMAN]  
 P41252 Isoleucyl-tRNA synthetase, cytoplasmic OS=Homo sapiens GN=IARS PE=1 SV=2 - [SYIC\_HUMAN]  
 Q9BPX5 Actin-related protein 2/3 complex subunit 5-like protein OS=Homo sapiens GN=ARPC5L PE=1 SV=1 - [ARP5L\_HUMAN]

P62873 Guanine nucleotide-binding protein G(I)/G(S)/G(T) subunit beta-1 OS=Homo sapiens GN=GNB1 PE=1 SV=3  
 Q9UK22 F-box only protein 2 OS=Homo sapiens GN=FBXO2 PE=1 SV=2 - [FBX2\_HUMAN]  
 P48556 26S proteasome non-ATPase regulatory subunit 8 OS=Homo sapiens GN=PSMD8 PE=1 SV=2 - [PSMD8\_HUMAN]  
 P10619 Lysosomal protective protein OS=Homo sapiens GN=CTSA PE=1 SV=2 - [PPGB\_HUMAN]  
 O76021 Ribosomal L1 domain-containing protein 1 OS=Homo sapiens GN=RSL1D1 PE=1 SV=3 - [RL1D1\_HUMAN]  
 P45877 Peptidyl-prolyl cis-trans isomerase C OS=Homo sapiens GN=PPIC PE=1 SV=1 - [PPIC\_HUMAN]  
 Q9NZD2 Glycolipid transfer protein OS=Homo sapiens GN=GLTP PE=1 SV=3 - [GLTP\_HUMAN]  
 O14787 Transportin-2 OS=Homo sapiens GN=TNPO2 PE=1 SV=3 - [TNPO2\_HUMAN]  
 P21266 Glutathione S-transferase Mu 3 OS=Homo sapiens GN=GSTM3 PE=1 SV=3 - [GSTM3\_HUMAN]  
 O95497 Pantetheinase OS=Homo sapiens GN=VNN1 PE=1 SV=2 - [VNN1\_HUMAN]  
 Q92542 Nicastrin OS=Homo sapiens GN=NCSTN PE=1 SV=2 - [NICA\_HUMAN]  
 Q9Y411 Myosin-Va OS=Homo sapiens GN=MYO5A PE=1 SV=2 - [MYO5A\_HUMAN]  
 P00450 Ceruloplasmin OS=Homo sapiens GN=CP PE=1 SV=1 - [CERU\_HUMAN]  
 Q9H6S3 Epidermal growth factor receptor kinase substrate 8-like protein 2 OS=Homo sapiens GN=EPS8L2 PE=1 SV=2  
 Q15257 Serine/threonine-protein phosphatase 2A activator OS=Homo sapiens GN=PPP2R4 PE=1 SV=3 - [PTPA\_HUMAN]  
 Q00688 Peptidyl-prolyl cis-trans isomerase FKBP3 OS=Homo sapiens GN=FKBP3 PE=1 SV=1 - [FKBP3\_HUMAN]  
 O00231 26S proteasome non-ATPase regulatory subunit 11 OS=Homo sapiens GN=PSMD11 PE=1 SV=3 - [PSD11\_HUMAN]  
 Q96TA1 Niban-like protein 1 OS=Homo sapiens GN=FAM129B PE=1 SV=3 - [NIBL1\_HUMAN]  
 P42766 60S ribosomal protein L35 OS=Homo sapiens GN=RPL35 PE=1 SV=2 - [RL35\_HUMAN]  
 Q9BVJ7 Dual specificity protein phosphatase 23 OS=Homo sapiens GN=DUSP23 PE=1 SV=1 - [DUS23\_HUMAN]  
 P61086 Ubiquitin-conjugating enzyme E2 K OS=Homo sapiens GN=UBE2K PE=1 SV=3 - [UBE2K\_HUMAN]  
 O95372 Acyl-protein thioesterase 2 OS=Homo sapiens GN=LYPLA2 PE=1 SV=1 - [LYPA2\_HUMAN]  
 O94905 Erlin-2 OS=Homo sapiens GN=ERLIN2 PE=1 SV=1 - [ERLN2\_HUMAN]  
 O60888 Protein CutA OS=Homo sapiens GN=CUTA PE=1 SV=2 - [CUTA\_HUMAN]  
 Q8NBS9 Thioredoxin domain-containing protein 5 OS=Homo sapiens GN=TXNDC5 PE=1 SV=2 - [TXND5\_HUMAN]  
 Q9UBI6 Guanine nucleotide-binding protein G(I)/G(S)/G(O) subunit gamma-12 OS=Homo sapiens GN=GNG12 PE=1 SV=3  
 Q9NQ88 Probable fructose-2,6-bisphosphatase TIGAR OS=Homo sapiens GN=TIGAR PE=1 SV=1 - [TIGAR\_HUMAN]  
 O43598 Deoxyribonucleoside 5'-monophosphate N-glycosidase OS=Homo sapiens GN=RCL PE=1 SV=1 - [RCL\_HUMAN]  
 P09874 Poly [ADP-ribose] polymerase 1 OS=Homo sapiens GN=PARP1 PE=1 SV=4 - [PARP1\_HUMAN]  
 Q9UL16 Coiled-coil domain-containing protein 19, mitochondrial OS=Homo sapiens GN=CCDC19 PE=1 SV=2 - [CCD19\_HUMAN]  
 P63000 Ras-related C3 botulinum toxin substrate 1 OS=Homo sapiens GN=RAC1 PE=1 SV=1 - [RAC1\_HUMAN]  
 Q13423 NAD(P) transhydrogenase, mitochondrial OS=Homo sapiens GN=NNT PE=1 SV=3 - [NNTM\_HUMAN]  
 O15305 Phosphomannomutase 2 OS=Homo sapiens GN=PMM2 PE=1 SV=1 - [PMM2\_HUMAN]  
 Q92572 AP-3 complex subunit sigma-1 OS=Homo sapiens GN=AP3S1 PE=1 SV=1 - [AP3S1\_HUMAN]  
 P51858 Hepatoma-derived growth factor OS=Homo sapiens GN=HDGF PE=1 SV=1 - [HDGF\_HUMAN]  
 P35613 Basigin OS=Homo sapiens GN=BSG PE=1 SV=2 - [BASI\_HUMAN]  
 P07741 Adenine phosphoribosyltransferase OS=Homo sapiens GN=APRT PE=1 SV=2 - [APT\_HUMAN]  
 Q9NVM6 DnaJ homolog subfamily C member 17 OS=Homo sapiens GN=DNAJC17 PE=1 SV=1 - [DJC17\_HUMAN]  
 Q9NUJ1 Abhydrolase domain-containing protein 10, mitochondrial OS=Homo sapiens GN=ABHD10 PE=1 SV=1 - [ABHDA\_HUMAN]  
 P55145 Mesencephalic astrocyte-derived neurotrophic factor OS=Homo sapiens GN=MANF PE=1 SV=3 - [MANF\_HUMAN]  
 P20039 HLA class II histocompatibility antigen, DRB1-11 beta chain OS=Homo sapiens GN=HLA-DRB1 PE=1 SV=1 - [2B1B\_HUMAN]  
 P53004 Biliverdin reductase A OS=Homo sapiens GN=BLVRA PE=1 SV=2 - [BIEA\_HUMAN]  
 Q9UBR2 Cathepsin Z OS=Homo sapiens GN=CTSZ PE=1 SV=1 - [CATZ\_HUMAN]  
 P84103 Serine/arginine-rich splicing factor 3 OS=Homo sapiens GN=SRSF3 PE=1 SV=1 - [SRSF3\_HUMAN]  
 Q9UNL2 Translocon-associated protein subunit gamma OS=Homo sapiens GN=SSR3 PE=1 SV=1 - [SSRG\_HUMAN]  
 Q14956 Transmembrane glycoprotein NMB OS=Homo sapiens GN=GPNMB PE=1 SV=2 - [GPNMB\_HUMAN]  
 O75223 Gamma-glutamylcyclotransferase OS=Homo sapiens GN=GGCT PE=1 SV=1 - [GGCT\_HUMAN]  
 P62256 Ubiquitin-conjugating enzyme E2 H OS=Homo sapiens GN=UBE2H PE=1 SV=1 - [UBE2H\_HUMAN]  
 P21912 Succinate dehydrogenase [ubiquinone] iron-sulfur subunit, mitochondrial OS=Homo sapiens GN=SDHB PE=1 SV=3  
 P61803 Dolichyl-diphosphooligosaccharide--protein glycosyltransferase subunit DAD1 OS=Homo sapiens GN=DAD1 PE=1 SV=3  
 Q9H4G4 Golgi-associated plant pathogenesis-related protein 1 OS=Homo sapiens GN=GLIPR2 PE=1 SV=3 - [GAPR1\_HUMAN]  
 Q96EK6 Glucosamine 6-phosphate N-acetyltransferase OS=Homo sapiens GN=GPNAT1 PE=1 SV=1 - [GNA1\_HUMAN]  
 O95433 Activator of 90 kDa heat shock protein ATPase homolog 1 OS=Homo sapiens GN=AHSA1 PE=1 SV=1 - [AHSA1\_HUMAN]  
 P13686 Tartrate-resistant acid phosphatase type 5 OS=Homo sapiens GN=ACP5 PE=1 SV=3 - [PPA5\_HUMAN]  
 Q9UKM9 RNA-binding protein Raly OS=Homo sapiens GN=RALY PE=1 SV=1 - [RALY\_HUMAN]  
 Q15185 Prostaglandin E synthase 3 OS=Homo sapiens GN=PTGES3 PE=1 SV=1 - [TEBP\_HUMAN]  
 Q9NX63 Coiled-coil-helix-coiled-coil-helix domain-containing protein 3, mitochondrial OS=Homo sapiens GN=CHCHD3 PE=1 SV=1  
 P08648 Integrin alpha-5 OS=Homo sapiens GN=ITGA5 PE=1 SV=2 - [ITA5\_HUMAN]

Q8NFJ5 Retinoic acid-induced protein 3 OS=Homo sapiens GN=GPRC5A PE=1 SV=2 - [RAI3\_HUMAN]  
 Q9UL25 Ras-related protein Rab-21 OS=Homo sapiens GN=RAB21 PE=1 SV=3 - [RAB21\_HUMAN]  
 O00154 Cytosolic acyl coenzyme A thioester hydrolase OS=Homo sapiens GN=ACOT7 PE=1 SV=3 - [BACH\_HUMAN]  
 P50991 T-complex protein 1 subunit delta OS=Homo sapiens GN=CCT4 PE=1 SV=4 - [TCPD\_HUMAN]  
 Q9UBQ5 Eukaryotic translation initiation factor 3 subunit K OS=Homo sapiens GN=EIF3K PE=1 SV=1 - [EIF3K\_HUMAN]  
 P60983 Glia maturation factor beta OS=Homo sapiens GN=GMFB PE=1 SV=2 - [GMFB\_HUMAN]  
 Q03001 Bullous pemphigoid antigen 1 OS=Homo sapiens GN=DST PE=1 SV=4 - [BPA1\_HUMAN]  
 O43747 AP-1 complex subunit gamma-1 OS=Homo sapiens GN=AP1G1 PE=1 SV=5 - [AP1G1\_HUMAN]  
 Q07960 Rho GTPase-activating protein 1 OS=Homo sapiens GN=ARHGAP1 PE=1 SV=1 - [RHG01\_HUMAN]  
 Q15102 Platelet-activating factor acetylhydrolase IB subunit gamma OS=Homo sapiens GN=PFAFH1B3 PE=1 SV=1  
 O75340 Programmed cell death protein 6 OS=Homo sapiens GN=PDCC6 PE=1 SV=1 - [PDCC6\_HUMAN]  
 Q9NRX4 14 kDa phosphohistidine phosphatase OS=Homo sapiens GN=PHPT1 PE=1 SV=1 - [PHP14\_HUMAN]  
 P09661 U2 small nuclear ribonucleoprotein A' OS=Homo sapiens GN=SNRPA1 PE=1 SV=2 - [RU2A\_HUMAN]  
 Q6RI45 Bromodomain and WD repeat-containing protein 3 OS=Homo sapiens GN=BRWD3 PE=1 SV=2 - [BRWD3\_HUMAN]  
 Q9NP97 Dynein light chain roadblock-type 1 OS=Homo sapiens GN=DYNLRB1 PE=1 SV=3 - [DLRB1\_HUMAN]  
 O96008 Mitochondrial import receptor subunit TOM40 homolog OS=Homo sapiens GN=TOMM40 PE=1 SV=1 - [TOM40\_HUMAN]  
 Q9Y6N5 Sulfide:quinone oxidoreductase, mitochondrial OS=Homo sapiens GN=SQRDL PE=1 SV=1 - [SQRD\_HUMAN]  
 Q8N1G4 Leucine-rich repeat-containing protein 47 OS=Homo sapiens GN=LRR47 PE=1 SV=1 - [LRC47\_HUMAN]  
 Q16853 Membrane primary amine oxidase OS=Homo sapiens GN=AOC3 PE=1 SV=3 - [AOC3\_HUMAN]  
 Q99873 Protein arginine N-methyltransferase 1 OS=Homo sapiens GN=PRMT1 PE=1 SV=2 - [ANM1\_HUMAN]  
 Q9UBQ0 Vacuolar protein sorting-associated protein 29 OS=Homo sapiens GN=VPS29 PE=1 SV=1 - [VPS29\_HUMAN]  
 Q9H8Y8 Golgi reassembly-stacking protein 2 OS=Homo sapiens GN=GORASP2 PE=1 SV=3 - [GORS2\_HUMAN]  
 O94973 AP-2 complex subunit alpha-2 OS=Homo sapiens GN=AP2A2 PE=1 SV=2 - [AP2A2\_HUMAN]  
 Q7Z739 YTH domain family protein 3 OS=Homo sapiens GN=YTHDF3 PE=1 SV=1 - [YTHD3\_HUMAN]  
 Q15370 Transcription elongation factor B polypeptide 2 OS=Homo sapiens GN=TCEB2 PE=1 SV=1 - [ELOB\_HUMAN]  
 P49207 60S ribosomal protein L34 OS=Homo sapiens GN=RPL34 PE=1 SV=3 - [RL34\_HUMAN]  
 P07954 Fumarate hydratase, mitochondrial OS=Homo sapiens GN=FB PE=1 SV=3 - [FUMH\_HUMAN]  
 P09455 Retinol-binding protein 1 OS=Homo sapiens GN=RBP1 PE=1 SV=2 - [RET1\_HUMAN]  
 P17900 Ganglioside GM2 activator OS=Homo sapiens GN=GM2A PE=1 SV=4 - [SAP3\_HUMAN]  
 Q02750 Dual specificity mitogen-activated protein kinase kinase 1 OS=Homo sapiens GN=MAP2K1 PE=1 SV=2 - [MP2K1\_HUMAN]  
 O14949 Cytochrome b-c1 complex subunit 8 OS=Homo sapiens GN=UQCRCQ PE=1 SV=4 - [QCR8\_HUMAN]  
 Q9BTV4 Transmembrane protein 43 OS=Homo sapiens GN=TMEM43 PE=1 SV=1 - [TMM43\_HUMAN]  
 Q99584 Protein S100-A13 OS=Homo sapiens GN=S100A13 PE=1 SV=1 - [S10AD\_HUMAN]  
 Q14165 Malectin OS=Homo sapiens GN=MLEC PE=1 SV=1 - [MLEC\_HUMAN]  
 Q9Y224 UPF0568 protein C14orf166 OS=Homo sapiens GN=C14orf166 PE=1 SV=1 - [CN166\_HUMAN]  
 P02787 Serotransferrin OS=Homo sapiens GN=TF PE=1 SV=3 - [TRFE\_HUMAN]  
 P34897 Serine hydroxymethyltransferase, mitochondrial OS=Homo sapiens GN=SHMT2 PE=1 SV=3 - [GLYM\_HUMAN]  
 P26447 Protein S100-A4 OS=Homo sapiens GN=S100A4 PE=1 SV=1 - [S10A4\_HUMAN]  
 P54577 Tyrosyl-tRNA synthetase, cytoplasmic OS=Homo sapiens GN=YARS PE=1 SV=4 - [SYYC\_HUMAN]  
 P61923 Coatamer subunit zeta-1 OS=Homo sapiens GN=COPZ1 PE=1 SV=1 - [COPZ1\_HUMAN]  
 Q96DB5 Regulator of microtubule dynamics protein 1 OS=Homo sapiens GN=FAM82B PE=1 SV=1 - [RMD1\_HUMAN]  
 Q13439 Golgin subfamily A member 4 OS=Homo sapiens GN=GOLGA4 PE=1 SV=1 - [GOGA4\_HUMAN]  
 P00533 Epidermal growth factor receptor OS=Homo sapiens GN=EGFR PE=1 SV=2 - [EGFR\_HUMAN]  
 P09012 U1 small nuclear ribonucleoprotein A OS=Homo sapiens GN=SNRPA PE=1 SV=3 - [SNRPA\_HUMAN]  
 P60866 40S ribosomal protein S20 OS=Homo sapiens GN=RPS20 PE=1 SV=1 - [RS20\_HUMAN]  
 O94903 Proline synthase co-transcribed bacterial homolog protein OS=Homo sapiens GN=PROSC PE=1 SV=1 - [PROSC\_HUMAN]  
 P02753 Retinol-binding protein 4 OS=Homo sapiens GN=RBP4 PE=1 SV=3 - [RET4\_HUMAN]  
 P40616 ADP-ribosylation factor-like protein 1 OS=Homo sapiens GN=ARL1 PE=1 SV=1 - [ARL1\_HUMAN]  
 O43488 Aflatoxin B1 aldehyde reductase member 2 OS=Homo sapiens GN=AKR7A2 PE=1 SV=3 - [ARK72\_HUMAN]  
 Q12907 Vesicular integral-membrane protein VIP36 OS=Homo sapiens GN=LMAN2 PE=1 SV=1 - [LMAN2\_HUMAN]  
 Q07666 KH domain-containing, RNA-binding, signal transduction-associated protein 1 OS=Homo sapiens GN=KHDRBS1 PE=1 SV=1  
 Q9NR31 GTP-binding protein SAR1a OS=Homo sapiens GN=SAR1A PE=1 SV=1 - [SAR1A\_HUMAN]  
 P48739 Phosphatidylinositol transfer protein beta isoform OS=Homo sapiens GN=PITPNB PE=1 SV=2 - [PIPNB\_HUMAN]  
 Q93009 Ubiquitin carboxyl-terminal hydrolase 7 OS=Homo sapiens GN=USP7 PE=1 SV=2 - [UBP7\_HUMAN]  
 Q9P0J0 NADH dehydrogenase [ubiquinone] 1 alpha subcomplex subunit 13 OS=Homo sapiens GN=NDUFA13 PE=1 SV=3  
 P07108 Acyl-CoA-binding protein OS=Homo sapiens GN=DBI PE=1 SV=2 - [ACBP\_HUMAN]  
 Q8WXH0 Nesprin-2 OS=Homo sapiens GN=SYNE2 PE=1 SV=3 - [SYNE2\_HUMAN]  
 Q9H2U2 Inorganic pyrophosphatase 2, mitochondrial OS=Homo sapiens GN=PPA2 PE=1 SV=2 - [IPYR2\_HUMAN]



P30405 Peptidyl-prolyl cis-trans isomerase F, mitochondrial OS=Homo sapiens GN=PPIF PE=1 SV=1 - [PPIF\_HUMAN]  
Q9HB71 Calcyclin-binding protein OS=Homo sapiens GN=CACYBP PE=1 SV=2 - [CYBP\_HUMAN]  
P25398 40S ribosomal protein S12 OS=Homo sapiens GN=RPS12 PE=1 SV=3 - [RS12\_HUMAN]  
P30046 D-dopachrome decarboxylase OS=Homo sapiens GN=DDT PE=1 SV=3 - [DOPD\_HUMAN]  
Q07075 Glutamyl aminopeptidase OS=Homo sapiens GN=ENPEP PE=1 SV=3 - [AMPE\_HUMAN]  
O43760 Synaptogyrin-2 OS=Homo sapiens GN=SYNGR2 PE=1 SV=1 - [SNG2\_HUMAN]  
O75131 Copine-3 OS=Homo sapiens GN=CPNE3 PE=1 SV=1 - [CPNE3\_HUMAN]  
Q16864 V-type proton ATPase subunit F OS=Homo sapiens GN=ATP6V1F PE=1 SV=2 - [VATF\_HUMAN]  
Q05682 Caldesmon OS=Homo sapiens GN=CALD1 PE=1 SV=3 - [CALD1\_HUMAN]  
P49006 MARCKS-related protein OS=Homo sapiens GN=MARCKSL1 PE=1 SV=2 - [MRP\_HUMAN]  
P02458 Collagen alpha-1(II) chain OS=Homo sapiens GN=COL2A1 PE=1 SV=3 - [CO2A1\_HUMAN]  
Q12904 Aminoacyl tRNA synthase complex-interacting multifunctional protein 1 OS=Homo sapiens GN=AIMP1 PE=1 SV=2  
P25774 Cathepsin S OS=Homo sapiens GN=CTSS PE=1 SV=3 - [CATS\_HUMAN]  
O95202 LETM1 and EF-hand domain-containing protein 1, mitochondrial OS=Homo sapiens GN=LETM1 PE=1 SV=1  
P04216 Thy-1 membrane glycoprotein OS=Homo sapiens GN=THY1 PE=1 SV=2 - [THY1\_HUMAN]  
P15559 NAD(P)H dehydrogenase [quinone] 1 OS=Homo sapiens GN=NQO1 PE=1 SV=1 - [NQO1\_HUMAN]  
O00515 Ladinin-1 OS=Homo sapiens GN=LAD1 PE=1 SV=2 - [LAD1\_HUMAN]  
Q9Y265 RuvB-like 1 OS=Homo sapiens GN=RUVBL1 PE=1 SV=1 - [RUVB1\_HUMAN]  
Q96PK6 RNA-binding protein 14 OS=Homo sapiens GN=RBM14 PE=1 SV=2 - [RBM14\_HUMAN]  
Q16630 Cleavage and polyadenylation specificity factor subunit 6 OS=Homo sapiens GN=CPSF6 PE=1 SV=2 - [CPSF6\_HUMAN]  
Q9Y5M8 Signal recognition particle receptor subunit beta OS=Homo sapiens GN=SRPRB PE=1 SV=3 - [SRPRB\_HUMAN]  
Q15181 Inorganic pyrophosphatase OS=Homo sapiens GN=PPA1 PE=1 SV=2 - [IPYR\_HUMAN]  
P49747 Cartilage oligomeric matrix protein OS=Homo sapiens GN=COMP PE=1 SV=2 - [COMP\_HUMAN]  
Q9Y3A5 Ribosome maturation protein SBDS OS=Homo sapiens GN=SBDS PE=1 SV=4 - [SBDS\_HUMAN]  
O60749 Sorting nexin-2 OS=Homo sapiens GN=SNX2 PE=1 SV=2 - [SNX2\_HUMAN]  
P62910 60S ribosomal protein L32 OS=Homo sapiens GN=RPL32 PE=1 SV=2 - [RL32\_HUMAN]  
P60468 Protein transport protein Sec61 subunit beta OS=Homo sapiens GN=SEC61B PE=1 SV=2 - [SC61B\_HUMAN]  
Q9BW04 Specifically androgen-regulated gene protein OS=Homo sapiens GN=SARG PE=1 SV=2 - [SARG\_HUMAN]  
O95782 AP-2 complex subunit alpha-1 OS=Homo sapiens GN=AP2A1 PE=1 SV=3 - [AP2A1\_HUMAN]  
P00367 Glutamate dehydrogenase 1, mitochondrial OS=Homo sapiens GN=GLUD1 PE=1 SV=2 - [DHE3\_HUMAN]  
P12277 Creatine kinase B-type OS=Homo sapiens GN=CKB PE=1 SV=1 - [KCRB\_HUMAN]  
Q7L1Q6 Basic leucine zipper and W2 domain-containing protein 1 OS=Homo sapiens GN=BZW1 PE=1 SV=1 - [BZW1\_HUMAN]  
Q15691 Microtubule-associated protein RP/EB family member 1 OS=Homo sapiens GN=MAPRE1 PE=1 SV=3 - [MARE1\_HUMAN]  
Q15758 Neutral amino acid transporter B(0) OS=Homo sapiens GN=SLC1A5 PE=1 SV=2 - [AAAT\_HUMAN]  
Q9Y2A7 Nck-associated protein 1 OS=Homo sapiens GN=NCKAP1 PE=1 SV=1 - [NCKP1\_HUMAN]  
Q15005 Signal peptidase complex subunit 2 OS=Homo sapiens GN=SPCS2 PE=1 SV=3 - [SPCS2\_HUMAN]  
P07305 Histone H1.0 OS=Homo sapiens GN=H1F0 PE=1 SV=3 - [H10\_HUMAN]  
O95197 Reticulon-3 OS=Homo sapiens GN=RTN3 PE=1 SV=2 - [RTN3\_HUMAN]  
P48729 Casein kinase I isoform alpha OS=Homo sapiens GN=CSNK1A1 PE=1 SV=2 - [KC1A\_HUMAN]  
P19623 Spermidine synthase OS=Homo sapiens GN=SRM PE=1 SV=1 - [SPEE\_HUMAN]  
P61769 Beta-2-microglobulin OS=Homo sapiens GN=B2M PE=1 SV=1 - [B2MG\_HUMAN]  
O95168 NADH dehydrogenase [ubiquinone] 1 beta subcomplex subunit 4 OS=Homo sapiens GN=NDUFB4 PE=1 SV=3  
Q8N163 Protein KIAA1967 OS=Homo sapiens GN=KIAA1967 PE=1 SV=2 - [K1967\_HUMAN]  
P61758 Prefoldin subunit 3 OS=Homo sapiens GN=VBP1 PE=1 SV=3 - [PFD3\_HUMAN]  
Q6YHK3 CD109 antigen OS=Homo sapiens GN=CD109 PE=1 SV=2 - [CD109\_HUMAN]  
O14684 Prostaglandin E synthase OS=Homo sapiens GN=PTGES PE=1 SV=2 - [PTGES\_HUMAN]  
Q15629 Translocating chain-associated membrane protein 1 OS=Homo sapiens GN=TRAM1 PE=1 SV=3 - [TRAM1\_HUMAN]  
Q8TC12 Retinol dehydrogenase 11 OS=Homo sapiens GN=RDH11 PE=1 SV=2 - [RDH11\_HUMAN]  
P62760 Visinin-like protein 1 OS=Homo sapiens GN=VSNL1 PE=1 SV=2 - [VISL1\_HUMAN]  
P04004 Vitronectin OS=Homo sapiens GN=VTN PE=1 SV=1 - [VTNC\_HUMAN]  
P11166 Solute carrier family 2, facilitated glucose transporter member 1 OS=Homo sapiens GN=SLC2A1 PE=1 SV=2  
P29218 Inositol monophosphatase 1 OS=Homo sapiens GN=IMPA1 PE=1 SV=1 - [IMPA1\_HUMAN]  
Q7Z460 CLIP-associating protein 1 OS=Homo sapiens GN=CLASP1 PE=1 SV=1 - [CLAP1\_HUMAN]  
Q9NR30 Nucleolar RNA helicase 2 OS=Homo sapiens GN=DDX21 PE=1 SV=5 - [DDX21\_HUMAN]  
Q9Y6C9 Mitochondrial carrier homolog 2 OS=Homo sapiens GN=MTCH2 PE=1 SV=1 - [MTCH2\_HUMAN]  
O00217 NADH dehydrogenase [ubiquinone] iron-sulfur protein 8, mitochondrial OS=Homo sapiens GN=NDUFS8 PE=1 SV=1  
Q9NZH8 Interleukin-1 family member 9 OS=Homo sapiens GN=IL1F9 PE=1 SV=1 - [IL1F9\_HUMAN]  
Q9Y3E5 Peptidyl-tRNA hydrolase 2, mitochondrial OS=Homo sapiens GN=PTRH2 PE=1 SV=1 - [PTH2\_HUMAN]

Q8N4V1 Membrane magnesium transporter 1 OS=Homo sapiens GN=MMGT1 PE=1 SV=1 - [MMGT1\_HUMAN]  
 Q8TE68 Epidermal growth factor receptor kinase substrate 8-like protein 1 OS=Homo sapiens GN=EPS8L1 PE=1 SV=3  
 Q9H0U3 Magnesium transporter protein 1 OS=Homo sapiens GN=MAGT1 PE=1 SV=1 - [MAGT1\_HUMAN]  
 P12259 Coagulation factor V OS=Homo sapiens GN=F5 PE=1 SV=4 - [FA5\_HUMAN]  
 O95833 Chloride intracellular channel protein 3 OS=Homo sapiens GN=CLIC3 PE=1 SV=2 - [CLIC3\_HUMAN]  
 Q9NZ45 CDGSH iron-sulfur domain-containing protein 1 OS=Homo sapiens GN=CISD1 PE=1 SV=1 - [CISD1\_HUMAN]  
 A8MWD9 Small nuclear ribonucleoprotein G-like protein OS=Homo sapiens PE=3 SV=2 - [RUXGL\_HUMAN]  
 P09496 Clathrin light chain A OS=Homo sapiens GN=CLTA PE=1 SV=1 - [CLCA\_HUMAN]  
 P61956 Small ubiquitin-related modifier 2 OS=Homo sapiens GN=SUMO2 PE=1 SV=1 - [SUMO2\_HUMAN]  
 O00461 Golgi integral membrane protein 4 OS=Homo sapiens GN=GOLIM4 PE=1 SV=1 - [GOLI4\_HUMAN]  
 O95793 Double-stranded RNA-binding protein Staufen homolog 1 OS=Homo sapiens GN=STAU1 PE=1 SV=2 - [STAU1\_HUMAN]  
 Q16666 Gamma-interferon-inducible protein 16 OS=Homo sapiens GN=IF16 PE=1 SV=3 - [IF16\_HUMAN]  
 P63220 40S ribosomal protein S21 OS=Homo sapiens GN=RPS21 PE=1 SV=1 - [RS21\_HUMAN]  
 P21108 Ribose-phosphate pyrophosphokinase 3 OS=Homo sapiens GN=PRPS1L1 PE=1 SV=2 - [PRPS3\_HUMAN]  
 Q9H9B4 Sideroflexin-1 OS=Homo sapiens GN=SFXN1 PE=1 SV=4 - [SFXN1\_HUMAN]  
 O14602 Eukaryotic translation initiation factor 1A, Y-chromosomal OS=Homo sapiens GN=EIF1AY PE=1 SV=4 - [IF1AY\_HUMAN]  
 P49773 Histidine triad nucleotide-binding protein 1 OS=Homo sapiens GN=HINT1 PE=1 SV=2 - [HINT1\_HUMAN]  
 P39019 40S ribosomal protein S19 OS=Homo sapiens GN=RPS19 PE=1 SV=2 - [RS19\_HUMAN]  
 Q04756 Hepatocyte growth factor activator OS=Homo sapiens GN=HGFA PE=1 SV=1 - [HGFA\_HUMAN]  
 Q9BWJ5 Splicing factor 3B subunit 5 OS=Homo sapiens GN=SF3B5 PE=1 SV=1 - [SF3B5\_HUMAN]  
 O15355 Protein phosphatase 1G OS=Homo sapiens GN=PPM1G PE=1 SV=1 - [PPM1G\_HUMAN]  
 P84090 Enhancer of rudimentary homolog OS=Homo sapiens GN=ERH PE=1 SV=1 - [ERH\_HUMAN]  
 P20042 Eukaryotic translation initiation factor 2 subunit 2 OS=Homo sapiens GN=EIF2S2 PE=1 SV=2 - [IF2B\_HUMAN]  
 Q99417 C-Myc-binding protein OS=Homo sapiens GN=MYCBP PE=1 SV=3 - [MYCBP\_HUMAN]  
 P61009 Signal peptidase complex subunit 3 OS=Homo sapiens GN=SPCS3 PE=1 SV=1 - [SPCS3\_HUMAN]  
 P46379 Large proline-rich protein BAT3 OS=Homo sapiens GN=BAT3 PE=1 SV=2 - [BAT3\_HUMAN]  
 P02748 Complement component C9 OS=Homo sapiens GN=C9 PE=1 SV=2 - [CO9\_HUMAN]  
 Q86X76 Nitrilase homolog 1 OS=Homo sapiens GN=NIT1 PE=1 SV=2 - [NIT1\_HUMAN]  
 P82912 28S ribosomal protein S11, mitochondrial OS=Homo sapiens GN=MRPS11 PE=1 SV=2 - [RT11\_HUMAN]  
 O00472 RNA polymerase II elongation factor ELL2 OS=Homo sapiens GN=ELL2 PE=1 SV=2 - [ELL2\_HUMAN]  
 Q9NZ01 Trans-2,3-enoyl-CoA reductase OS=Homo sapiens GN=TECR PE=1 SV=1 - [TECR\_HUMAN]  
 Q96A26 Protein FAM162A OS=Homo sapiens GN=FAM162A PE=1 SV=2 - [F162A\_HUMAN]  
 O43617 Trafficking protein particle complex subunit 3 OS=Homo sapiens GN=TRAPPC3 PE=1 SV=1 - [TPPC3\_HUMAN]  
 P38159 Heterogeneous nuclear ribonucleoprotein G OS=Homo sapiens GN=RBMX PE=1 SV=3 - [HNRPG\_HUMAN]  
 O75915 PRA1 family protein 3 OS=Homo sapiens GN=ARL6IP5 PE=1 SV=1 - [PRAF3\_HUMAN]  
 Q9BTW9 Tubulin-specific chaperone D OS=Homo sapiens GN=TBCD PE=1 SV=2 - [TBCD\_HUMAN]  
 O15427 Monocarboxylate transporter 4 OS=Homo sapiens GN=SLC16A3 PE=1 SV=1 - [MOT4\_HUMAN]  
 P27144 Adenylate kinase isoenzyme 4, mitochondrial OS=Homo sapiens GN=AK4 PE=1 SV=1 - [KAD4\_HUMAN]  
 P63167 Dynein light chain 1, cytoplasmic OS=Homo sapiens GN=DYNLL1 PE=1 SV=1 - [DYL1\_HUMAN]  
 Q9GZZ1 N-alpha-acetyltransferase 50, NatE catalytic subunit OS=Homo sapiens GN=NAA50 PE=1 SV=1 - [NAA50\_HUMAN]  
 Q8NCW5 Apolipoprotein A-I-binding protein OS=Homo sapiens GN=APOA1BP PE=1 SV=2 - [AIBP\_HUMAN]  
 Q9HC07 Transmembrane protein 165 OS=Homo sapiens GN=TMEM165 PE=1 SV=1 - [TM165\_HUMAN]  
 Q92890 Ubiquitin fusion degradation protein 1 homolog OS=Homo sapiens GN=UFD1L PE=1 SV=3 - [UFD1\_HUMAN]  
 O95445 Apolipoprotein M OS=Homo sapiens GN=APOM PE=1 SV=2 - [APOM\_HUMAN]  
 Q15942 Zyxin OS=Homo sapiens GN=ZYX PE=1 SV=1 - [ZYX\_HUMAN]  
 Q9BUT1 3-hydroxybutyrate dehydrogenase type 2 OS=Homo sapiens GN=BDH2 PE=1 SV=2 - [BDH2\_HUMAN]  
 Q01581 Hydroxymethylglutaryl-CoA synthase, cytoplasmic OS=Homo sapiens GN=HMGCS1 PE=1 SV=2 - [HMCS1\_HUMAN]  
 Q86Y82 Syntaxin-12 OS=Homo sapiens GN=STX12 PE=1 SV=1 - [STX12\_HUMAN]  
 Q07955 Serine/arginine-rich splicing factor 1 OS=Homo sapiens GN=SRSF1 PE=1 SV=2 - [SRSF1\_HUMAN]  
 P81605 Dermcidin OS=Homo sapiens GN=DCD PE=1 SV=2 - [DCD\_HUMAN]  
 O75891 10-formyltetrahydrofolate dehydrogenase OS=Homo sapiens GN=ALDH1L1 PE=1 SV=2 - [FTHFD\_HUMAN]  
 P21281 V-type proton ATPase subunit B, brain isoform OS=Homo sapiens GN=ATP6V1B2 PE=1 SV=3 - [VATB2\_HUMAN]  
 P02735 Serum amyloid A protein OS=Homo sapiens GN=SAA1 PE=1 SV=2 - [SAA\_HUMAN]  
 Q9NY12 H/ACA ribonucleoprotein complex subunit 1 OS=Homo sapiens GN=GAR1 PE=1 SV=1 - [GAR1\_HUMAN]  
 Q9Y624 Junctional adhesion molecule A OS=Homo sapiens GN=F11R PE=1 SV=1 - [JAM1\_HUMAN]  
 P63279 SUMO-conjugating enzyme UBC9 OS=Homo sapiens GN=UBE2I PE=1 SV=1 - [UBC9\_HUMAN]  
 Q14152 Eukaryotic translation initiation factor 3 subunit A OS=Homo sapiens GN=EIF3A PE=1 SV=1 - [EIF3A\_HUMAN]  
 O95816 BAG family molecular chaperone regulator 2 OS=Homo sapiens GN=BAG2 PE=1 SV=1 - [BAG2\_HUMAN]

P09497 Clathrin light chain B OS=Homo sapiens GN=CLTB PE=1 SV=1 - [CLCB\_HUMAN]  
Q16795 NADH dehydrogenase [ubiquinone] 1 alpha subcomplex subunit 9, mitochondrial OS=Homo sapiens GN=NDUFA9 PE=1  
Q8WX93 Palladin OS=Homo sapiens GN=PALLD PE=1 SV=3 - [PALLD\_HUMAN]  
P51636 Caveolin-2 OS=Homo sapiens GN=CAV2 PE=1 SV=2 - [CAV2\_HUMAN]  
P61326 Protein mago nashi homolog OS=Homo sapiens GN=MAGOH PE=1 SV=1 - [MGN\_HUMAN]  
P21926 CD9 antigen OS=Homo sapiens GN=CD9 PE=1 SV=4 - [CD9\_HUMAN]  
Q02487 Desmocollin-2 OS=Homo sapiens GN=DSC2 PE=1 SV=1 - [DSC2\_HUMAN]  
P50402 Emerin OS=Homo sapiens GN=EMD PE=1 SV=1 - [EMD\_HUMAN]  
Q9P258 Protein RCC2 OS=Homo sapiens GN=RCC2 PE=1 SV=2 - [RCC2\_HUMAN]  
O95881 Thioredoxin domain-containing protein 12 OS=Homo sapiens GN=TXNDC12 PE=1 SV=1 - [TXD12\_HUMAN]  
P30153 Serine/threonine-protein phosphatase 2A 65 kDa regulatory subunit A alpha isoform OS=Homo sapiens GN=PPP2R1A PE=1  
Q02790 Peptidyl-prolyl cis-trans isomerase FKBP4 OS=Homo sapiens GN=FKBP4 PE=1 SV=3 - [FKBP4\_HUMAN]  
P19388 DNA-directed RNA polymerases I, II, and III subunit RPABC1 OS=Homo sapiens GN=POLR2E PE=1 SV=4  
Q14847 LIM and SH3 domain protein 1 OS=Homo sapiens GN=LASP1 PE=1 SV=2 - [LASP1\_HUMAN]  
P13591 Neural cell adhesion molecule 1 OS=Homo sapiens GN=NCAM1 PE=1 SV=3 - [NCAM1\_HUMAN]  
Q9Y639 Neuroplastin OS=Homo sapiens GN=NPTN PE=1 SV=2 - [NPTN\_HUMAN]  
P04181 Ornithine aminotransferase, mitochondrial OS=Homo sapiens GN=OAT PE=1 SV=1 - [OAT\_HUMAN]  
Q13637 Ras-related protein Rab-32 OS=Homo sapiens GN=RAB32 PE=1 SV=3 - [RAB32\_HUMAN]  
P08621 U1 small nuclear ribonucleoprotein 70 kDa OS=Homo sapiens GN=SNRNP70 PE=1 SV=2 - [RU17\_HUMAN]  
P31942 Heterogeneous nuclear ribonucleoprotein H3 OS=Homo sapiens GN=HNRNPH3 PE=1 SV=2 - [HNRH3\_HUMAN]  
P12931 Proto-oncogene tyrosine-protein kinase Src OS=Homo sapiens GN=SRC PE=1 SV=3 - [SRC\_HUMAN]  
P61421 V-type proton ATPase subunit d 1 OS=Homo sapiens GN=ATP6V0D1 PE=1 SV=1 - [VA0D1\_HUMAN]  
Q14116 Interleukin-18 OS=Homo sapiens GN=IL18 PE=1 SV=1 - [IL18\_HUMAN]  
Q96QR8 Transcriptional activator protein Pur-beta OS=Homo sapiens GN=PURB PE=1 SV=3 - [PURB\_HUMAN]  
P54727 UV excision repair protein RAD23 homolog B OS=Homo sapiens GN=RAD23B PE=1 SV=1 - [RD23B\_HUMAN]  
P17655 Calpain-2 catalytic subunit OS=Homo sapiens GN=CAPN2 PE=1 SV=6 - [CAN2\_HUMAN]  
P07602 Proactivator polypeptide OS=Homo sapiens GN=PSAP PE=1 SV=2 - [SAP\_HUMAN]  
O75608 Acyl-protein thioesterase 1 OS=Homo sapiens GN=LYPLA1 PE=1 SV=1 - [LYPA1\_HUMAN]  
Q9H9S4 Calcium-binding protein 39-like OS=Homo sapiens GN=CAB39L PE=1 SV=3 - [CB39L\_HUMAN]  
P41227 N-alpha-acetyltransferase 10, NatA catalytic subunit OS=Homo sapiens GN=NAA10 PE=1 SV=1 - [NAA10\_HUMAN]  
Q15555 Microtubule-associated protein RP/EB family member 2 OS=Homo sapiens GN=MAPRE2 PE=1 SV=1 - [MARE2\_HUMAN]  
P22087 rRNA 2'-O-methyltransferase fibrillar OS=Homo sapiens GN=FBL PE=1 SV=2 - [FBRL\_HUMAN]  
Q8IVF2 Protein AHNAK2 OS=Homo sapiens GN=AHNAK2 PE=1 SV=2 - [AHNK2\_HUMAN]  
Q92820 Gamma-glutamyl hydrolase OS=Homo sapiens GN=GGH PE=1 SV=2 - [GGH\_HUMAN]  
Q13445 Transmembrane emp24 domain-containing protein 1 OS=Homo sapiens GN=TMED1 PE=1 SV=1 - [TMED1\_HUMAN]  
Q92600 Cell differentiation protein RCD1 homolog OS=Homo sapiens GN=RQCD1 PE=1 SV=1 - [RCD1\_HUMAN]  
P36543 V-type proton ATPase subunit E 1 OS=Homo sapiens GN=ATP6V1E1 PE=1 SV=1 - [VATE1\_HUMAN]  
Q9Y2V2 Calcium-regulated heat stable protein 1 OS=Homo sapiens GN=CARHSP1 PE=1 SV=2 - [CHSP1\_HUMAN]  
Q99959 Plakophilin-2 OS=Homo sapiens GN=PKP2 PE=1 SV=2 - [PKP2\_HUMAN]  
O76003 Glutaredoxin-3 OS=Homo sapiens GN=GLRX3 PE=1 SV=2 - [GLRX3\_HUMAN]  
Q9Y230 RuvB-like 2 OS=Homo sapiens GN=RUVBL2 PE=1 SV=3 - [RUVB2\_HUMAN]  
Q9H6Z4 Ran-binding protein 3 OS=Homo sapiens GN=RANBP3 PE=1 SV=1 - [RANB3\_HUMAN]  
P05090 Apolipoprotein D OS=Homo sapiens GN=APOD PE=1 SV=1 - [APOD\_HUMAN]  
P83916 Chromobox protein homolog 1 OS=Homo sapiens GN=CBX1 PE=1 SV=1 - [CBX1\_HUMAN]  
O95169 NADH dehydrogenase [ubiquinone] 1 beta subcomplex subunit 8, mitochondrial OS=Homo sapiens GN=NDUFB8 PE=1 SV=1  
Q9Y394 Dehydrogenase/reductase SDR family member 7 OS=Homo sapiens GN=DHRS7 PE=1 SV=1 - [DHRS7\_HUMAN]  
Q9NZ08 Endoplasmic reticulum aminopeptidase 1 OS=Homo sapiens GN=ERAP1 PE=1 SV=3 - [ERAP1\_HUMAN]  
Q8N5K1 CDGSH iron-sulfur domain-containing protein 2 OS=Homo sapiens GN=CISD2 PE=1 SV=1 - [CISD2\_HUMAN]  
P20908 Collagen alpha-1(V) chain OS=Homo sapiens GN=COL5A1 PE=1 SV=3 - [CO5A1\_HUMAN]  
P13727 Bone marrow proteoglycan OS=Homo sapiens GN=PRG2 PE=1 SV=2 - [PRG2\_HUMAN]  
P28062 Proteasome subunit beta type-8 OS=Homo sapiens GN=PSMB8 PE=1 SV=3 - [PSB8\_HUMAN]  
P53680 AP-2 complex subunit sigma OS=Homo sapiens GN=AP2S1 PE=1 SV=2 - [AP2S1\_HUMAN]  
Q9UII2 ATPase inhibitor, mitochondrial OS=Homo sapiens GN=ATPIF1 PE=1 SV=1 - [ATIF1\_HUMAN]  
Q8TCT9 Minor histocompatibility antigen H13 OS=Homo sapiens GN=HM13 PE=1 SV=1 - [HM13\_HUMAN]  
Q96C19 EF-hand domain-containing protein D2 OS=Homo sapiens GN=EFHD2 PE=1 SV=1 - [EFHD2\_HUMAN]  
Q8NF91 Nesprin-1 OS=Homo sapiens GN=SYNE1 PE=1 SV=3 - [SYNE1\_HUMAN]  
Q9NTJ3 Structural maintenance of chromosomes protein 4 OS=Homo sapiens GN=SMC4 PE=1 SV=2 - [SMC4\_HUMAN]  
P35269 General transcription factor IIF subunit 1 OS=Homo sapiens GN=GTF2F1 PE=1 SV=2 - [T2FA\_HUMAN]

Q9C037 Tripartite motif-containing protein 4 OS=Homo sapiens GN=TRIM4 PE=2 SV=2 - [TRIM4\_HUMAN]  
P49321 Nuclear autoantigenic sperm protein OS=Homo sapiens GN=NASP PE=1 SV=2 - [NASP\_HUMAN]  
O60610 Protein diaphanous homolog 1 OS=Homo sapiens GN=DIAPH1 PE=1 SV=2 - [DIAP1\_HUMAN]  
P11387 DNA topoisomerase 1 OS=Homo sapiens GN=TOP1 PE=1 SV=2 - [TOP1\_HUMAN]  
Q8TCJ2 Dolichyl-diphosphooligosaccharide--protein glycosyltransferase subunit STT3B OS=Homo sapiens GN=STT3B PE=1 SV=1  
P62330 ADP-ribosylation factor 6 OS=Homo sapiens GN=ARF6 PE=1 SV=2 - [ARF6\_HUMAN]  
P42892 Endothelin-converting enzyme 1 OS=Homo sapiens GN=ECE1 PE=1 SV=2 - [ECE1\_HUMAN]  
P38117 Electron transfer flavoprotein subunit beta OS=Homo sapiens GN=ETFB PE=1 SV=3 - [ETFB\_HUMAN]  
O60841 Eukaryotic translation initiation factor 5B OS=Homo sapiens GN=EIF5B PE=1 SV=4 - [IF2P\_HUMAN]  
Q96RW7 Hemicentin-1 OS=Homo sapiens GN=HMCN1 PE=1 SV=2 - [HMCN1\_HUMAN]  
P67870 Casein kinase II subunit beta OS=Homo sapiens GN=CSNK2B PE=1 SV=1 - [CSK2B\_HUMAN]  
P35573 Glycogen debranching enzyme OS=Homo sapiens GN=AGL PE=1 SV=3 - [GDE\_HUMAN]  
O00422 Histone deacetylase complex subunit SAP18 OS=Homo sapiens GN=SAP18 PE=1 SV=1 - [SAP18\_HUMAN]  
Q9UN36 Protein NDRG2 OS=Homo sapiens GN=NDRG2 PE=1 SV=2 - [NDRG2\_HUMAN]  
Q15019 Septin-2 OS=Homo sapiens GN=SEPT2 PE=1 SV=1 - [SEPT2\_HUMAN]  
P30042 ES1 protein homolog, mitochondrial OS=Homo sapiens GN=C21orf33 PE=1 SV=3 - [ES1\_HUMAN]  
Q9Y446 Plakophilin-3 OS=Homo sapiens GN=PKP3 PE=1 SV=1 - [PKP3\_HUMAN]  
P00488 Coagulation factor XIII A chain OS=Homo sapiens GN=F13A1 PE=1 SV=4 - [F13A\_HUMAN]  
Q13148 TAR DNA-binding protein 43 OS=Homo sapiens GN=TARDBP PE=1 SV=1 - [TADBP\_HUMAN]  
Q09028 Histone-binding protein RBBP4 OS=Homo sapiens GN=RBBP4 PE=1 SV=3 - [RBBP4\_HUMAN]  
P61077 Ubiquitin-conjugating enzyme E2 D3 OS=Homo sapiens GN=UBE2D3 PE=1 SV=1 - [UB2D3\_HUMAN]  
O60701 UDP-glucose 6-dehydrogenase OS=Homo sapiens GN=UGDH PE=1 SV=1 - [UGDH\_HUMAN]  
P01130 Low-density lipoprotein receptor OS=Homo sapiens GN=LDLR PE=1 SV=1 - [LDLR\_HUMAN]  
P56556 NADH dehydrogenase [ubiquinone] 1 alpha subcomplex subunit 6 OS=Homo sapiens GN=NDUFA6 PE=1 SV=3  
B0FP48 Uroplakin-3b-like protein OS=Homo sapiens GN=UPK3BL PE=2 SV=1 - [UPK3L\_HUMAN]  
P63218 Guanine nucleotide-binding protein G(I)/G(S)/G(O) subunit gamma-5 OS=Homo sapiens GN=GNG5 PE=1 SV=3  
Q3ZAA7 Vacuolar ATPase assembly integral membrane protein VMA21 OS=Homo sapiens GN=VMA21 PE=1 SV=1  
O43399 Tumor protein D54 OS=Homo sapiens GN=TPD52L2 PE=1 SV=2  
P41091 Eukaryotic translation initiation factor 2 subunit 3 OS=Homo sapiens GN=EIF2S3 PE=1 SV=3 - [IF2G\_HUMAN]  
P60228 Eukaryotic translation initiation factor 3 subunit E OS=Homo sapiens GN=EIF3E PE=1 SV=1 - [EIF3E\_HUMAN]  
O00483 NADH dehydrogenase [ubiquinone] 1 alpha subcomplex subunit 4 OS=Homo sapiens GN=NDUFA4 PE=1 SV=1  
P31948 Stress-induced-phosphoprotein 1 OS=Homo sapiens GN=STIP1 PE=1 SV=1 - [STIP1\_HUMAN]  
P23588 Eukaryotic translation initiation factor 4B OS=Homo sapiens GN=EIF4B PE=1 SV=2 - [IF4B\_HUMAN]  
Q9UQE7 Structural maintenance of chromosomes protein 3 OS=Homo sapiens GN=SMC3 PE=1 SV=2 - [SMC3\_HUMAN]  
O43670 Zinc finger protein 207 OS=Homo sapiens GN=ZNF207 PE=1 SV=1 - [ZN207\_HUMAN]  
Q6PIW4 Fidgetin-like protein 1 OS=Homo sapiens GN=FIGL1 PE=1 SV=2 - [FIGL1\_HUMAN]  
P07738 Bisphosphoglycerate mutase OS=Homo sapiens GN=BPGM PE=1 SV=2 - [PMGE\_HUMAN]  
P62191 26S protease regulatory subunit 4 OS=Homo sapiens GN=PSMC1 PE=1 SV=1 - [PRS4\_HUMAN]  
Q7Z4V5 Hepatoma-derived growth factor-related protein 2 OS=Homo sapiens GN=HDGFRP2 PE=1 SV=1 - [HDGR2\_HUMAN]  
O75376 Nuclear receptor corepressor 1 OS=Homo sapiens GN=NCOR1 PE=1 SV=2 - [NCOR1\_HUMAN]  
Q9ULC4 Malignant T cell-amplified sequence 1 OS=Homo sapiens GN=MCTS1 PE=1 SV=1 - [MCTS1\_HUMAN]  
Q99598 Translin-associated protein X OS=Homo sapiens GN=TSNAX PE=1 SV=1 - [TSNAX\_HUMAN]  
Q6WKZ4 Rab11 family-interacting protein 1 OS=Homo sapiens GN=RAB11FIP1 PE=1 SV=2 - [RFIP1\_HUMAN]  
Q9Y3B3 Transmembrane emp24 domain-containing protein 7 OS=Homo sapiens GN=TMED7 PE=1 SV=2 - [TMED7\_HUMAN]  
P55263 Adenosine kinase OS=Homo sapiens GN=ADK PE=1 SV=2 - [ADK\_HUMAN]  
P20810 Calpastatin OS=Homo sapiens GN=CAST PE=1 SV=4 - [ICAL\_HUMAN]  
Q9UKX3 Myosin-13 OS=Homo sapiens GN=MYH13 PE=1 SV=2 - [MYH13\_HUMAN]  
Q15738 Sterol-4-alpha-carboxylate 3-dehydrogenase, decarboxylating OS=Homo sapiens GN=NSDHL PE=1 SV=2  
P22234 Multifunctional protein ADE2 OS=Homo sapiens GN=PAICS PE=1 SV=3 - [PUR6\_HUMAN]  
Q92804 TATA-binding protein-associated factor 2N OS=Homo sapiens GN=TAF15 PE=1 SV=1 - [RBP56\_HUMAN]  
O60925 Prefoldin subunit 1 OS=Homo sapiens GN=PFDN1 PE=1 SV=2 - [PFD1\_HUMAN]  
Q9UHA4 Mitogen-activated protein kinase scaffold protein 1 OS=Homo sapiens GN=MAPKSP1 PE=1 SV=1 - [MPKS1\_HUMAN]  
Q86YZ3 Hornerin OS=Homo sapiens GN=HRNR PE=1 SV=2 - [HORN\_HUMAN]  
O75431 Metaxin-2 OS=Homo sapiens GN=MTX2 PE=1 SV=1 - [MTX2\_HUMAN]  
Q04323 UBX domain-containing protein 1 OS=Homo sapiens GN=UBXN1 PE=1 SV=2 - [UBXN1\_HUMAN]  
Q9UKR5 Probable ergosterol biosynthetic protein 28 OS=Homo sapiens GN=C14orf1 PE=1 SV=1 - [ERG28\_HUMAN]  
Q7LBR1 Charged multivesicular body protein 1b OS=Homo sapiens GN=CHMP1B PE=1 SV=1 - [CHM1B\_HUMAN]  
P43121 Cell surface glycoprotein MUC18 OS=Homo sapiens GN=MCAM PE=1 SV=2 - [MUC18\_HUMAN]

P04275 von Willebrand factor OS=Homo sapiens GN=VWF PE=1 SV=4 - [VWF\_HUMAN]  
Q96HY6 DDRGK domain-containing protein 1 OS=Homo sapiens GN=DDRGK1 PE=1 SV=2 - [DDRGK\_HUMAN]  
P43686 26S protease regulatory subunit 6B OS=Homo sapiens GN=PSMC4 PE=1 SV=2 - [PRS6B\_HUMAN]  
P63165 Small ubiquitin-related modifier 1 OS=Homo sapiens GN=SUMO1 PE=1 SV=1 - [SUMO1\_HUMAN]  
Q14573 Inositol 1,4,5-trisphosphate receptor type 3 OS=Homo sapiens GN=ITPR3 PE=1 SV=2 - [ITPR3\_HUMAN]  
P43487 Ran-specific GTPase-activating protein OS=Homo sapiens GN=RANBP1 PE=1 SV=1 - [RANG\_HUMAN]  
Q9Y305 Acyl-coenzyme A thioesterase 9, mitochondrial OS=Homo sapiens GN=ACOT9 PE=1 SV=2 - [ACOT9\_HUMAN]  
P28482 Mitogen-activated protein kinase 1 OS=Homo sapiens GN=MAPK1 PE=1 SV=3 - [MK01\_HUMAN]  
Q9NYL4 Peptidyl-prolyl cis-trans isomerase FKBP11 OS=Homo sapiens GN=FKBP11 PE=1 SV=1 - [FKB11\_HUMAN]  
Q13451 Peptidyl-prolyl cis-trans isomerase FKBP5 OS=Homo sapiens GN=FKBP5 PE=1 SV=2 - [FKBP5\_HUMAN]  
Q96CW1 AP-2 complex subunit mu OS=Homo sapiens GN=AP2M1 PE=1 SV=2 - [AP2M1\_HUMAN]  
O15031 Plexin-B2 OS=Homo sapiens GN=PLXNB2 PE=1 SV=3 - [PLXB2\_HUMAN]  
Q7KZ85 Transcription elongation factor SPT6 OS=Homo sapiens GN=SUPT6H PE=1 SV=2 - [SPT6H\_HUMAN]  
Q53H82 Beta-lactamase-like protein 2 OS=Homo sapiens GN=LACTB2 PE=1 SV=2 - [LACB2\_HUMAN]  
O96005 Cleft lip and palate transmembrane protein 1 OS=Homo sapiens GN=CLPTM1 PE=1 SV=1 - [CLPT1\_HUMAN]  
P11498 Pyruvate carboxylase, mitochondrial OS=Homo sapiens GN=PC PE=1 SV=2 - [PYC\_HUMAN]  
O95571 Protein ETHE1, mitochondrial OS=Homo sapiens GN=ETHE1 PE=1 SV=2 - [ETHE1\_HUMAN]  
Q13630 GDP-L-fucose synthase OS=Homo sapiens GN=TSTA3 PE=1 SV=1 - [FCL\_HUMAN]  
Q9H993 UPF0364 protein C6orf211 OS=Homo sapiens GN=C6orf211 PE=1 SV=1 - [CF211\_HUMAN]  
Q9NR09 Baculoviral IAP repeat-containing protein 6 OS=Homo sapiens GN=BIRC6 PE=1 SV=2 - [BIRC6\_HUMAN]  
P55809 Succinyl-CoA:3-ketoacid-coenzyme A transferase 1, mitochondrial OS=Homo sapiens GN=OXCT1 PE=1 SV=1  
Q9Y617 Phosphoserine aminotransferase OS=Homo sapiens GN=PSAT1 PE=1 SV=2 - [SERC\_HUMAN]  
Q15018 BRISC complex subunit Abro1 OS=Homo sapiens GN=FAM175B PE=1 SV=2 - [F175B\_HUMAN]  
Q9UHQ4 B-cell receptor-associated protein 29 OS=Homo sapiens GN=BCAP29 PE=1 SV=2 - [BAP29\_HUMAN]  
Q12849 G-rich sequence factor 1 OS=Homo sapiens GN=GRSF1 PE=1 SV=3 - [GRSF1\_HUMAN]  
Q5T4S7 E3 ubiquitin-protein ligase UBR4 OS=Homo sapiens GN=UBR4 PE=1 SV=1 - [UBR4\_HUMAN]  
Q8WZ42 Titin OS=Homo sapiens GN=TTN PE=1 SV=4 - [TITIN\_HUMAN]  
P07099 Epoxide hydrolase 1 OS=Homo sapiens GN=EPHX1 PE=1 SV=1 - [HYEP\_HUMAN]  
Q9UN52 COP9 signalosome complex subunit 3 OS=Homo sapiens GN=COPS3 PE=1 SV=3 - [CSN3\_HUMAN]  
P12525 Protein L-Myc-2 OS=Homo sapiens GN=MYCL2 PE=2 SV=1 - [MYCL2\_HUMAN]  
P30626 Sorcin OS=Homo sapiens GN=SRI PE=1 SV=1 - [SORCN\_HUMAN]  
Q14008 Cytoskeleton-associated protein 5 OS=Homo sapiens GN=CKAP5 PE=1 SV=3 - [CKAP5\_HUMAN]  
P31939 Bifunctional purine biosynthesis protein PURH OS=Homo sapiens GN=ATIC PE=1 SV=3 - [PUR9\_HUMAN]  
Q2LD37 Uncharacterized protein KIAA1109 OS=Homo sapiens GN=KIAA1109 PE=1 SV=2 - [K1109\_HUMAN]  
P00966 Argininosuccinate synthase OS=Homo sapiens GN=ASS1 PE=1 SV=2 - [ASSY\_HUMAN]  
Q5TA45 Integrator complex subunit 11 OS=Homo sapiens GN=CPSF3L PE=1 SV=2 - [INT11\_HUMAN]  
Q9NR12 PDZ and LIM domain protein 7 OS=Homo sapiens GN=PDLIM7 PE=1 SV=1 - [PDLI7\_HUMAN]  
Q99700 Ataxin-2 OS=Homo sapiens GN=ATXN2 PE=1 SV=2 - [ATX2\_HUMAN]  
Q5T699 Putative uncharacterized protein C6orf183 OS=Homo sapiens GN=C6orf183 PE=5 SV=2 - [CF183\_HUMAN]  
Q9BXM0 Periaxin OS=Homo sapiens GN=PRX PE=1 SV=2 - [PRAX\_HUMAN]  
P62312 U6 snRNA-associated Sm-like protein Lsm6 OS=Homo sapiens GN=LSM6 PE=1 SV=1 - [LSM6\_HUMAN]  
Q9BYX2 TBC1 domain family member 2A OS=Homo sapiens GN=TBC1D2 PE=1 SV=3 - [TBD2A\_HUMAN]  
Q9NY33 Dipeptidyl peptidase 3 OS=Homo sapiens GN=DPP3 PE=1 SV=2 - [DPP3\_HUMAN]  
Q9C0D4 Zinc finger protein 518B OS=Homo sapiens GN=ZNF518B PE=2 SV=2 - [Z518B\_HUMAN]  
Q9Y2I6 Ninein-like protein OS=Homo sapiens GN=NINL PE=1 SV=2 - [NINL\_HUMAN]  
P43490 Nicotinamide phosphoribosyltransferase OS=Homo sapiens GN=NAMPT PE=1 SV=1 - [NAMPT\_HUMAN]  
Q9UBE0 SUMO-activating enzyme subunit 1 OS=Homo sapiens GN=SAE1 PE=1 SV=1 - [SAE1\_HUMAN]  
P09417 Dihydropteridine reductase OS=Homo sapiens GN=QDPR PE=1 SV=2 - [DHPR\_HUMAN]  
Q9BRS2 Serine/threonine-protein kinase RIO1 OS=Homo sapiens GN=RIOK1 PE=1 SV=2 - [RIOK1\_HUMAN]  
Q15165 Serum paraoxonase/arylesterase 2 OS=Homo sapiens GN=PON2 PE=1 SV=3 - [PON2\_HUMAN]  
Q9NZM3 Intersectin-2 OS=Homo sapiens GN=ITSN2 PE=1 SV=3 - [ITSN2\_HUMAN]  
Q16643 Drebrin OS=Homo sapiens GN=DBN1 PE=1 SV=4 - [DREB\_HUMAN]  
P11413 Glucose-6-phosphate 1-dehydrogenase OS=Homo sapiens GN=G6PD PE=1 SV=4 - [G6PD\_HUMAN]  
Q96AE4 Far upstream element-binding protein 1 OS=Homo sapiens GN=FUBP1 PE=1 SV=3 - [FUBP1\_HUMAN]  
O95613 Pericentrin OS=Homo sapiens GN=PCNT PE=1 SV=4 - [PCNT\_HUMAN]  
P51114 Fragile X mental retardation syndrome-related protein 1 OS=Homo sapiens GN=FXR1 PE=1 SV=3 - [FXR1\_HUMAN]  
Q9UKD2 mRNA turnover protein 4 homolog OS=Homo sapiens GN=MRT04 PE=1 SV=2 - [MRT4\_HUMAN]  
Q9Y3B8 Oligoribonuclease, mitochondrial OS=Homo sapiens GN=REXO2 PE=1 SV=3 - [ORN\_HUMAN]

Q96RK0 Protein capicua homolog OS=Homo sapiens GN=CIC PE=1 SV=2 - [CIC\_HUMAN]  
P13861 cAMP-dependent protein kinase type II-alpha regulatory subunit OS=Homo sapiens GN=PRKAR2A PE=1 SV=2  
P25445 Tumor necrosis factor receptor superfamily member 6 OS=Homo sapiens GN=FAS PE=1 SV=1 - [TNR6\_HUMAN]  
P82094 TATA element modulatory factor OS=Homo sapiens GN=TMF1 PE=1 SV=2 - [TMF1\_HUMAN]  
Q5BJE1 Uncharacterized protein C18orf34 OS=Homo sapiens GN=C18orf34 PE=1 SV=3 - [CR034\_HUMAN]  
Q9P0K1 Disintegrin and metalloproteinase domain-containing protein 22 OS=Homo sapiens GN=ADAM22 PE=1 SV=1  
O43149 Zinc finger ZZ-type and EF-hand domain-containing protein 1 OS=Homo sapiens GN=ZZEF1 PE=1 SV=6 - [ZZEF1\_HUMAN]
