# Supplementary material for: Human thymic epithelial primary cells produce exosomes carrying tissue-restricted antigens
Source: PubMed Central journal article supplement — Immunol Cell Biol. 2015 Mar 17;93(8):727–34. doi: 10.1038/icb.2015.33 (PMC4575951; doi:10.1038/icb.2015.33), 2015-03-17
Supplement: icb201533x3.pdf [file icb201533x3.pdf]

**Table S2.** Identified proteins in exosomes (culture 1)

| Acc. Nr.(Swissprot) | Description                                                                                      |
|---------------------|--------------------------------------------------------------------------------------------------|
| P02751              | Fibronectin OS=Homo sapiens GN=FN1 PE=1 SV=4 - [FINC_HUMAN]                                      |
| P12111              | Collagen alpha-3(VI) chain OS=Homo sapiens GN=COL6A3 PE=1 SV=5 - [CO6A3_HUMAN]                   |
| P04264              | Keratin, type II cytoskeletal 1 OS=Homo sapiens GN=KRT1 PE=1 SV=6 - [K2C1_HUMAN]                 |
| P62805              | Histone H4 OS=Homo sapiens GN=HIST1H4A PE=1 SV=2 - [H4_HUMAN]                                    |
| P13645              | Keratin, type I cytoskeletal 10 OS=Homo sapiens GN=KRT10 PE=1 SV=6 - [K1C10_HUMAN]               |
| P35527              | Keratin, type I cytoskeletal 9 OS=Homo sapiens GN=KRT9 PE=1 SV=3 - [K1C9_HUMAN]                  |
| Q99877              | Histone H2B type 1-N OS=Homo sapiens GN=HIST1H2BN PE=1 SV=3 - [H2B1N_HUMAN]                      |
| P35908              | Keratin, type II cytoskeletal 2 epidermal OS=Homo sapiens GN=KRT2 PE=1 SV=2 - [K22E_HUMAN]       |
| P60709              | Actin, cytoplasmic 1 OS=Homo sapiens GN=ACTB PE=1 SV=1 - [ACTB_HUMAN]                            |
| P33778              | Histone H2B type 1-B OS=Homo sapiens GN=HIST1H2BB PE=1 SV=2 - [H2B1B_HUMAN]                      |
| P16403              | Histone H1.2 OS=Homo sapiens GN=HIST1H1C PE=1 SV=2 - [H12_HUMAN]                                 |
| P10412              | Histone H1.4 OS=Homo sapiens GN=HIST1H1E PE=1 SV=2 - [H14_HUMAN]                                 |
| P16402              | Histone H1.3 OS=Homo sapiens GN=HIST1H1D PE=1 SV=2 - [H13_HUMAN]                                 |
| Q96KK5              | Histone H2A type 1-H OS=Homo sapiens GN=HIST1H2AH PE=1 SV=3 - [H2A1H_HUMAN]                      |
| P02768              | Serum albumin OS=Homo sapiens GN=ALB PE=1 SV=2 - [ALBU_HUMAN]                                    |
| P02533              | Keratin, type I cytoskeletal 14 OS=Homo sapiens GN=KRT14 PE=1 SV=4 - [K1C14_HUMAN]               |
| Q93077              | Histone H2A type 1-C OS=Homo sapiens GN=HIST1H2AC PE=1 SV=3 - [H2A1C_HUMAN]                      |
| P02538              | Keratin, type II cytoskeletal 6A OS=Homo sapiens GN=KRT6A PE=1 SV=3 - [K2C6A_HUMAN]              |
| P01023              | Alpha-2-macroglobulin OS=Homo sapiens GN=A2M PE=1 SV=3 - [A2MG_HUMAN]                            |
| P07355              | Annexin A2 OS=Homo sapiens GN=ANXA2 PE=1 SV=2 - [ANXA2_HUMAN]                                    |
| P12109              | Collagen alpha-1(VI) chain OS=Homo sapiens GN=COL6A1 PE=1 SV=3 - [CO6A1_HUMAN]                   |
| P13647              | Keratin, type II cytoskeletal 5 OS=Homo sapiens GN=KRT5 PE=1 SV=3 - [K2C5_HUMAN]                 |
| Q04695              | Keratin, type I cytoskeletal 17 OS=Homo sapiens GN=KRT17 PE=1 SV=2 - [K1C17_HUMAN]               |
| P04259              | Keratin, type II cytoskeletal 6B OS=Homo sapiens GN=KRT6B PE=1 SV=5 - [K2C6B_HUMAN]              |
| P16401              | Histone H1.5 OS=Homo sapiens GN=HIST1H1B PE=1 SV=3 - [H15_HUMAN]                                 |
| P08779              | Keratin, type I cytoskeletal 16 OS=Homo sapiens GN=KRT16 PE=1 SV=4 - [K1C16_HUMAN]               |
| Q08380              | Galectin-3-binding protein OS=Homo sapiens GN=LGALS3BP PE=1 SV=1 - [LG3BP_HUMAN]                 |
| P16104              | Histone H2A.x OS=Homo sapiens GN=H2AFX PE=1 SV=2 - [H2AX_HUMAN]                                  |
| P68431              | Histone H3.1 OS=Homo sapiens GN=HIST1H3A PE=1 SV=2 - [H31_HUMAN]                                 |
| P55072              | Transitional endoplasmic reticulum ATPase OS=Homo sapiens GN=VCP PE=1 SV=4 - [TERA_HUMAN]        |
| P0C0S5              | Histone H2A.Z OS=Homo sapiens GN=H2AFZ PE=1 SV=2 - [H2AZ_HUMAN]                                  |
| P14618              | Pyruvate kinase isozymes M1/M2 OS=Homo sapiens GN=PKM2 PE=1 SV=4 - [KPYM_HUMAN]                  |
| P07437              | Tubulin beta chain OS=Homo sapiens GN=TUBB PE=1 SV=2 - [TBB5_HUMAN]                              |
| Q8IU66              | Histone H2A type 2-B OS=Homo sapiens GN=HIST2H2AB PE=1 SV=3 - [H2A2B_HUMAN]                      |
| P12110              | Collagen alpha-2(VI) chain OS=Homo sapiens GN=COL6A2 PE=1 SV=4 - [CO6A2_HUMAN]                   |
| P49327              | Fatty acid synthase OS=Homo sapiens GN=FASN PE=1 SV=3 - [FAS_HUMAN]                              |
| Q8WUM4              | Programmed cell death 6-interacting protein OS=Homo sapiens GN=PDCC6IP PE=1 SV=1 - [PDC6I_HUMAN] |
| P11142              | Heat shock cognate 71 kDa protein OS=Homo sapiens GN=HSPA8 PE=1 SV=1 - [HSP7C_HUMAN]             |
| P68371              | Tubulin beta-2C chain OS=Homo sapiens GN=TUBB2C PE=1 SV=1 - [TBB2C_HUMAN]                        |
| Q14764              | Major vault protein OS=Homo sapiens GN=MVP PE=1 SV=4 - [MVP_HUMAN]                               |
| P08238              | Heat shock protein HSP 90-beta OS=Homo sapiens GN=HSP90AB1 PE=1 SV=4 - [HS90B_HUMAN]             |
| P04083              | Annexin A1 OS=Homo sapiens GN=ANXA1 PE=1 SV=2 - [ANXA1_HUMAN]                                    |
| P06733              | Alpha-enolase OS=Homo sapiens GN=ENO1 PE=1 SV=2 - [ENOA_HUMAN]                                   |
| Q13885              | Tubulin beta-2A chain OS=Homo sapiens GN=TUBB2A PE=1 SV=1 - [TBB2A_HUMAN]                        |
| P0CG48              | Polyubiquitin-C OS=Homo sapiens GN=UBC PE=1 SV=3 - [UBC_HUMAN]                                   |
| P68363              | Tubulin alpha-1B chain OS=Homo sapiens GN=TUBA1B PE=1 SV=1 - [TBA1B_HUMAN]                       |
| P11047              | Laminin subunit gamma-1 OS=Homo sapiens GN=LAMC1 PE=1 SV=3 - [LAMC1_HUMAN]                       |
| P07900              | Heat shock protein HSP 90-alpha OS=Homo sapiens GN=HSP90AA1 PE=1 SV=5 - [HS90A_HUMAN]            |
| P08727              | Keratin, type I cytoskeletal 19 OS=Homo sapiens GN=KRT19 PE=1 SV=4 - [K1C19_HUMAN]               |
| Q7Z794              | Keratin, type II cytoskeletal 1b OS=Homo sapiens GN=KRT77 PE=1 SV=3 - [K2C1B_HUMAN]              |
| P55060              | Exportin-2 OS=Homo sapiens GN=CSE1L PE=1 SV=3 - [XPO2_HUMAN]                                     |
| P08133              | Annexin A6 OS=Homo sapiens GN=ANXA6 PE=1 SV=3 - [ANXA6_HUMAN]                                    |
| P26038              | Moesin OS=Homo sapiens GN=MSN PE=1 SV=3 - [MOES_HUMAN]                                           |
| P16144              | Integrin beta-4 OS=Homo sapiens GN=ITGB4 PE=1 SV=5 - [ITB4_HUMAN]                                |
| P27105              | Erythrocyte band 7 integral membrane protein OS=Homo sapiens GN=STOM PE=1 SV=3 - [STOM_HUMAN]    |

P07942 Laminin subunit beta-1 OS=Homo sapiens GN=LAMB1 PE=1 SV=2 - [LAMB1\_HUMAN]  
O43707 Alpha-actinin-4 OS=Homo sapiens GN=ACTN4 PE=1 SV=2 - [ACTN4\_HUMAN]  
P04406 Glyceraldehyde-3-phosphate dehydrogenase OS=Homo sapiens GN=GAPDH PE=1 SV=3 - [G3P\_HUMAN]  
P28074 Proteasome subunit beta type-5 OS=Homo sapiens GN=PSMB5 PE=1 SV=3 - [PSB5\_HUMAN]  
P05556 Integrin beta-1 OS=Homo sapiens GN=ITGB1 PE=1 SV=2 - [ITB1\_HUMAN]  
P02452 Collagen alpha-1(I) chain OS=Homo sapiens GN=COL1A1 PE=1 SV=5 - [CO1A1\_HUMAN]  
P12814 Alpha-actinin-1 OS=Homo sapiens GN=ACTN1 PE=1 SV=2 - [ACTN1\_HUMAN]  
Q7Z3Y8 Keratin, type I cytoskeletal 27 OS=Homo sapiens GN=KRT27 PE=1 SV=2 - [K1C27\_HUMAN]  
P05164 Myeloperoxidase OS=Homo sapiens GN=MPO PE=1 SV=1 - [PERM\_HUMAN]  
P13646 Keratin, type I cytoskeletal 13 OS=Homo sapiens GN=KRT13 PE=1 SV=4 - [K1C13\_HUMAN]  
Q16787 Laminin subunit alpha-3 OS=Homo sapiens GN=LAMA3 PE=1 SV=2 - [LAMA3\_HUMAN]  
P60900 Proteasome subunit alpha type-6 OS=Homo sapiens GN=PSMA6 PE=1 SV=1 - [PSA6\_HUMAN]  
P05023 Sodium/potassium-transporting ATPase subunit alpha-1 OS=Homo sapiens GN=ATP1A1 PE=1 SV=1  
P00338 L-lactate dehydrogenase A chain OS=Homo sapiens GN=LDHA PE=1 SV=2 - [LDHA\_HUMAN]  
P08107 Heat shock 70 kDa protein 1A/1B OS=Homo sapiens GN=HSPA1A PE=1 SV=5 - [HSP71\_HUMAN]  
Q9P2B2 Prostaglandin F2 receptor negative regulator OS=Homo sapiens GN=PTGFRN PE=1 SV=2 - [FPRP\_HUMAN]  
P04075 Fructose-bisphosphate aldolase A OS=Homo sapiens GN=ALDOA PE=1 SV=2 - [ALDOA\_HUMAN]  
P68104 Elongation factor 1-alpha 1 OS=Homo sapiens GN=EEF1A1 PE=1 SV=1 - [EF1A1\_HUMAN]  
P08195 4F2 cell-surface antigen heavy chain OS=Homo sapiens GN=SLC3A2 PE=1 SV=3 - [4F2\_HUMAN]  
Q15758 Neutral amino acid transporter B(0) OS=Homo sapiens GN=SLC1A5 PE=1 SV=2 - [AAAT\_HUMAN]  
P21333 Filamin-A OS=Homo sapiens GN=FLNA PE=1 SV=4 - [FLNA\_HUMAN]  
P26006 Integrin alpha-3 OS=Homo sapiens GN=ITGA3 PE=1 SV=5 - [ITA3\_HUMAN]  
P98160 Basement membrane-specific heparan sulfate proteoglycan core protein OS=Homo sapiens GN=HSPG2 PE=1  
Q9BUF5 Tubulin beta-6 chain OS=Homo sapiens GN=TUBB6 PE=1 SV=1 - [TBB6\_HUMAN]  
O15230 Laminin subunit alpha-5 OS=Homo sapiens GN=LAMA5 PE=1 SV=8 - [LAMA5\_HUMAN]  
P60842 Eukaryotic initiation factor 4A-1 OS=Homo sapiens GN=EIF4A1 PE=1 SV=1 - [IF4A1\_HUMAN]  
P23229 Integrin alpha-6 OS=Homo sapiens GN=ITGA6 PE=1 SV=4 - [ITA6\_HUMAN]  
P63104 14-3-3 protein zeta/delta OS=Homo sapiens GN=YWHAZ PE=1 SV=1 - [1433Z\_HUMAN]  
P20618 Proteasome subunit beta type-1 OS=Homo sapiens GN=PSMB1 PE=1 SV=2 - [PSB1\_HUMAN]  
P02649 Apolipoprotein E OS=Homo sapiens GN=APOE PE=1 SV=1 - [APOE\_HUMAN]  
P15311 Ezrin OS=Homo sapiens GN=EZR PE=1 SV=4 - [EZRI\_HUMAN]  
O14818 Proteasome subunit alpha type-7 OS=Homo sapiens GN=PSMA7 PE=1 SV=1 - [PSA7\_HUMAN]  
P11387 DNA topoisomerase 1 OS=Homo sapiens GN=TOP1 PE=1 SV=2 - [TOP1\_HUMAN]  
P12035 Keratin, type II cytoskeletal 3 OS=Homo sapiens GN=KRT3 PE=1 SV=3 - [K2C3\_HUMAN]  
P21980 Protein-glutamine gamma-glutamyltransferase 2 OS=Homo sapiens GN=TGM2 PE=1 SV=2 - [TGM2\_HUMAN]  
P53396 ATP-citrate synthase OS=Homo sapiens GN=ACLY PE=1 SV=3 - [ACLY\_HUMAN]  
Q00610 Clathrin heavy chain 1 OS=Homo sapiens GN=CLTC PE=1 SV=5 - [CLH1\_HUMAN]  
P01857 Ig gamma-1 chain C region OS=Homo sapiens GN=IGHG1 PE=1 SV=1 - [IGHG1\_HUMAN]  
P68366 Tubulin alpha-4A chain OS=Homo sapiens GN=TUBA4A PE=1 SV=1 - [TBA4A\_HUMAN]  
P35579 Myosin-9 OS=Homo sapiens GN=MYH9 PE=1 SV=4 - [MYH9\_HUMAN]  
P78371 T-complex protein 1 subunit beta OS=Homo sapiens GN=CCT2 PE=1 SV=4 - [TCPB\_HUMAN]  
P08670 Vimentin OS=Homo sapiens GN=VIM PE=1 SV=4 - [VIME\_HUMAN]  
P08758 Annexin A5 OS=Homo sapiens GN=ANXA5 PE=1 SV=2 - [ANXA5\_HUMAN]  
P28070 Proteasome subunit beta type-4 OS=Homo sapiens GN=PSMB4 PE=1 SV=4 - [PSB4\_HUMAN]  
P50990 T-complex protein 1 subunit theta OS=Homo sapiens GN=CCT8 PE=1 SV=4 - [TCPQ\_HUMAN]  
Q99715 Collagen alpha-1(XII) chain OS=Homo sapiens GN=COL12A1 PE=1 SV=2 - [COCA1\_HUMAN]  
P11021 78 kDa glucose-regulated protein OS=Homo sapiens GN=HSPA5 PE=1 SV=2 - [GRP78\_HUMAN]  
Q14204 Cytoplasmic dynein 1 heavy chain 1 OS=Homo sapiens GN=DYNC1H1 PE=1 SV=5 - [DYHC1\_HUMAN]  
P01834 Ig kappa chain C region OS=Homo sapiens GN=IGKC PE=1 SV=1 - [IGKC\_HUMAN]  
Q16851 UTP-glucose-1-phosphate uridylyltransferase OS=Homo sapiens GN=UGP2 PE=1 SV=5 - [UGPA\_HUMAN]  
O75367 Core histone macro-H2A.1 OS=Homo sapiens GN=H2AFY PE=1 SV=4 - [H2AY\_HUMAN]  
P50995 Annexin A11 OS=Homo sapiens GN=ANXA11 PE=1 SV=1 - [ANX11\_HUMAN]  
P25787 Proteasome subunit alpha type-2 OS=Homo sapiens GN=PSMA2 PE=1 SV=2 - [PSA2\_HUMAN]  
P49720 Proteasome subunit beta type-3 OS=Homo sapiens GN=PSMB3 PE=1 SV=2 - [PSB3\_HUMAN]  
P02794 Ferritin heavy chain OS=Homo sapiens GN=FTH1 PE=1 SV=2 - [FRIH\_HUMAN]  
P09211 Glutathione S-transferase P OS=Homo sapiens GN=GSTP1 PE=1 SV=2 - [GSTP1\_HUMAN]  
P02786 Transferrin receptor protein 1 OS=Homo sapiens GN=TFRC PE=1 SV=2 - [TFR1\_HUMAN]  
P01024 Complement C3 OS=Homo sapiens GN=C3 PE=1 SV=2 - [CO3\_HUMAN]

P27701 CD82 antigen OS=Homo sapiens GN=CD82 PE=1 SV=1 - [CD82\_HUMAN]  
Q13753 Laminin subunit gamma-2 OS=Homo sapiens GN=LAMC2 PE=1 SV=2 - [LAMC2\_HUMAN]  
P27708 CAD protein OS=Homo sapiens GN=CAD PE=1 SV=3 - [PYR1\_HUMAN]  
P04899 Guanine nucleotide-binding protein G(i) subunit alpha-2 OS=Homo sapiens GN=GNAI2 PE=1 SV=3  
P49368 T-complex protein 1 subunit gamma OS=Homo sapiens GN=CCT3 PE=1 SV=4 - [TCPG\_HUMAN]  
P16070 CD44 antigen OS=Homo sapiens GN=CD44 PE=1 SV=3 - [CD44\_HUMAN]  
P09525 Annexin A4 OS=Homo sapiens GN=ANXA4 PE=1 SV=4 - [ANXA4\_HUMAN]  
P28072 Proteasome subunit beta type-6 OS=Homo sapiens GN=PSMB6 PE=1 SV=4 - [PSB6\_HUMAN]  
Q13751 Laminin subunit beta-3 OS=Homo sapiens GN=LAMB3 PE=1 SV=1 - [LAMB3\_HUMAN]  
P17301 Integrin alpha-2 OS=Homo sapiens GN=ITGA2 PE=1 SV=1 - [ITA2\_HUMAN]  
P62241 40S ribosomal protein S8 OS=Homo sapiens GN=RPS8 PE=1 SV=2 - [RS8\_HUMAN]  
A6NMZ7 Collagen alpha-6(VI) chain OS=Homo sapiens GN=COL6A6 PE=1 SV=2 - [CO6A6\_HUMAN]  
O00468 Agrin OS=Homo sapiens GN=AGRN PE=1 SV=4 - [AGRIN\_HUMAN]  
P25788 Proteasome subunit alpha type-3 OS=Homo sapiens GN=PSMA3 PE=1 SV=2 - [PSA3\_HUMAN]  
P17987 T-complex protein 1 subunit alpha OS=Homo sapiens GN=TCP1 PE=1 SV=1 - [TCPA\_HUMAN]  
P07195 L-lactate dehydrogenase B chain OS=Homo sapiens GN=LDHB PE=1 SV=2 - [LDHB\_HUMAN]  
P25786 Proteasome subunit alpha type-1 OS=Homo sapiens GN=PSMA1 PE=1 SV=1 - [PSA1\_HUMAN]  
P20073 Annexin A7 OS=Homo sapiens GN=ANXA7 PE=1 SV=3 - [ANXA7\_HUMAN]  
P09874 Poly [ADP-ribose] polymerase 1 OS=Homo sapiens GN=PARP1 PE=1 SV=4 - [PARP1\_HUMAN]  
Q14CN4 Keratin, type II cytoskeletal 72 OS=Homo sapiens GN=KRT72 PE=1 SV=2 - [K2C72\_HUMAN]  
P61981 14-3-3 protein gamma OS=Homo sapiens GN=YWHAG PE=1 SV=2 - [1433G\_HUMAN]  
P28838 Cytosol aminopeptidase OS=Homo sapiens GN=LAP3 PE=1 SV=3 - [AMPL\_HUMAN]  
P28066 Proteasome subunit alpha type-5 OS=Homo sapiens GN=PSMA5 PE=1 SV=3 - [PSA5\_HUMAN]  
Q13200 26S proteasome non-ATPase regulatory subunit 2 OS=Homo sapiens GN=PSMD2 PE=1 SV=3  
P29401 Transketolase OS=Homo sapiens GN=TKT PE=1 SV=3 - [TKT\_HUMAN]  
P04439 HLA class I histocompatibility antigen, A-3 alpha chain OS=Homo sapiens GN=HLA-A PE=1 SV=2  
P12429 Annexin A3 OS=Homo sapiens GN=ANXA3 PE=1 SV=3 - [ANXA3\_HUMAN]  
P08962 CD63 antigen OS=Homo sapiens GN=CD63 PE=1 SV=2 - [CD63\_HUMAN]  
P08865 40S ribosomal protein SA OS=Homo sapiens GN=RPSA PE=1 SV=4 - [RSSA\_HUMAN]  
P13639 Elongation factor 2 OS=Homo sapiens GN=EEF2 PE=1 SV=4 - [EF2\_HUMAN]  
Q99832 T-complex protein 1 subunit eta OS=Homo sapiens GN=CCT7 PE=1 SV=2 - [TCPH\_HUMAN]  
P31947 14-3-3 protein sigma OS=Homo sapiens GN=SFN PE=1 SV=1 - [1433S\_HUMAN]  
Q07954 Prolow-density lipoprotein receptor-related protein 1 OS=Homo sapiens GN=LRP1 PE=1 SV=2  
P06744 Glucose-6-phosphate isomerase OS=Homo sapiens GN=GPI PE=1 SV=4 - [G6PI\_HUMAN]  
Q9C0H2 Protein tweety homolog 3 OS=Homo sapiens GN=TTYH3 PE=1 SV=3 - [TTYH3\_HUMAN]  
P35241 Radixin OS=Homo sapiens GN=RDX PE=1 SV=1 - [RADI\_HUMAN]  
P31946 14-3-3 protein beta/alpha OS=Homo sapiens GN=YWHAB PE=1 SV=3 - [1433B\_HUMAN]  
P07996 Thrombospondin-1 OS=Homo sapiens GN=THBS1 PE=1 SV=2 - [TSP1\_HUMAN]  
P40227 T-complex protein 1 subunit zeta OS=Homo sapiens GN=CCT6A PE=1 SV=3 - [TCPZ\_HUMAN]  
O43242 26S proteasome non-ATPase regulatory subunit 3 OS=Homo sapiens GN=PSMD3 PE=1 SV=2  
P19013 Keratin, type II cytoskeletal 4 OS=Homo sapiens GN=KRT4 PE=1 SV=4 - [K2C4\_HUMAN]  
Q3SY84 Keratin, type II cytoskeletal 71 OS=Homo sapiens GN=KRT71 PE=1 SV=3 - [K2C71\_HUMAN]  
P35613 Basigin OS=Homo sapiens GN=BSG PE=1 SV=2 - [BASI\_HUMAN]  
P15144 Aminopeptidase N OS=Homo sapiens GN=ANPEP PE=1 SV=4 - [AMPN\_HUMAN]  
Q9H4M9 EH domain-containing protein 1 OS=Homo sapiens GN=EHD1 PE=1 SV=2 - [EHD1\_HUMAN]  
P50991 T-complex protein 1 subunit delta OS=Homo sapiens GN=CCT4 PE=1 SV=4 - [TCPD\_HUMAN]  
P13611 Versican core protein OS=Homo sapiens GN=VCAN PE=1 SV=3 - [CSPG2\_HUMAN]  
P62258 14-3-3 protein epsilon OS=Homo sapiens GN=YWHA E PE=1 SV=1 - [1433E\_HUMAN]  
P25789 Proteasome subunit alpha type-4 OS=Homo sapiens GN=PSMA4 PE=1 SV=1 - [PSA4\_HUMAN]  
Q9H223 EH domain-containing protein 4 OS=Homo sapiens GN=EHD4 PE=1 SV=1 - [EHD4\_HUMAN]  
P27348 14-3-3 protein theta OS=Homo sapiens GN=YWHAQ PE=1 SV=1 - [1433T\_HUMAN]  
P23396 40S ribosomal protein S3 OS=Homo sapiens GN=RPS3 PE=1 SV=2 - [RS3\_HUMAN]  
P21589 5'-nucleotidase OS=Homo sapiens GN=NT5 E PE=1 SV=1 - [5NTD\_HUMAN]  
P60174 Triosephosphate isomerase OS=Homo sapiens GN=TP1 I PE=1 SV=3 - [TPIS\_HUMAN]  
P24043 Laminin subunit alpha-2 OS=Homo sapiens GN=LAMA2 PE=1 SV=4 - [LAMA2\_HUMAN]  
P80723 Brain acid soluble protein 1 OS=Homo sapiens GN=BASP1 PE=1 SV=2 - [BASP1\_HUMAN]  
P02461 Collagen alpha-1(III) chain OS=Homo sapiens GN=COL3A1 PE=1 SV=4 - [CO3A1\_HUMAN]  
P01871 Ig mu chain C region OS=Homo sapiens GN=IGHM PE=1 SV=3 - [IGHM\_HUMAN]

P07339 Cathepsin D OS=Homo sapiens GN=CTSD PE=1 SV=1 - [CATD\_HUMAN]  
P30464 HLA class I histocompatibility antigen, B-15 alpha chain OS=Homo sapiens GN=HLA-B PE=1 SV=2  
Q96QD8 Sodium-coupled neutral amino acid transporter 2 OS=Homo sapiens GN=SLC38A2 PE=1 SV=2  
Q04917 14-3-3 protein eta OS=Homo sapiens GN=YWHAH PE=1 SV=4 - [1433F\_HUMAN]  
P06756 Integrin alpha-V OS=Homo sapiens GN=ITGAV PE=1 SV=2 - [ITAV\_HUMAN]  
P07737 Profilin-1 OS=Homo sapiens GN=PFN1 PE=1 SV=2 - [PROF1\_HUMAN]  
P01876 Ig alpha-1 chain C region OS=Homo sapiens GN=IGHA1 PE=1 SV=2 - [IGHA1\_HUMAN]  
Q5VT79 Annexin A8-like protein 2 OS=Homo sapiens GN=ANXA8L2 PE=2 SV=1 - [AXA82\_HUMAN]  
O75083 WD repeat-containing protein 1 OS=Homo sapiens GN=WDR1 PE=1 SV=4 - [WDR1\_HUMAN]  
P22314 Ubiquitin-like modifier-activating enzyme 1 OS=Homo sapiens GN=UBA1 PE=1 SV=3 - [UBA1\_HUMAN]  
P01903 HLA class II histocompatibility antigen, DR alpha chain OS=Homo sapiens GN=HLA-DRA PE=1 SV=1  
Q92522 Histone H1x OS=Homo sapiens GN=H1FX PE=1 SV=1 - [H1X\_HUMAN]  
P0CG05 Ig lambda-2 chain C regions OS=Homo sapiens GN=IGLC2 PE=1 SV=1 - [LAC2\_HUMAN]  
P17980 26S protease regulatory subunit 6A OS=Homo sapiens GN=PSMC3 PE=1 SV=3 - [PRS6A\_HUMAN]  
P04792 Heat shock protein beta-1 OS=Homo sapiens GN=HSPB1 PE=1 SV=2 - [HSPB1\_HUMAN]  
P02792 Ferritin light chain OS=Homo sapiens GN=FTL PE=1 SV=2 - [FRIL\_HUMAN]  
P62195 26S protease regulatory subunit 8 OS=Homo sapiens GN=PSMC5 PE=1 SV=1 - [PRS8\_HUMAN]  
P14625 Endoplasmic reticulum chaperone protein OS=Homo sapiens GN=HSP90B1 PE=1 SV=1 - [ENPL\_HUMAN]  
P28065 Proteasome subunit beta type-9 OS=Homo sapiens GN=PSMB9 PE=1 SV=2 - [PSB9\_HUMAN]  
P14923 Junction plakoglobin OS=Homo sapiens GN=JUP PE=1 SV=3 - [PLAK\_HUMAN]  
P48643 T-complex protein 1 subunit epsilon OS=Homo sapiens GN=CCT5 PE=1 SV=1 - [TCPE\_HUMAN]  
P00558 Phosphoglycerate kinase 1 OS=Homo sapiens GN=PGK1 PE=1 SV=3 - [PGK1\_HUMAN]  
P29966 Myristoylated alanine-rich C-kinase substrate OS=Homo sapiens GN=MARCKS PE=1 SV=4 - [MARCS\_HUMAN]  
P08246 Neutrophil elastase OS=Homo sapiens GN=ELANE PE=1 SV=1 - [ELNE\_HUMAN]  
P08754 Guanine nucleotide-binding protein G(k) subunit alpha OS=Homo sapiens GN=GNAI3 PE=1 SV=3  
P61626 Lysozyme C OS=Homo sapiens GN=LYZ PE=1 SV=1 - [LYSC\_HUMAN]  
P08575 Receptor-type tyrosine-protein phosphatase C OS=Homo sapiens GN=PTPRC PE=1 SV=2 - [PTPRC\_HUMAN]  
O75369 Filamin-B OS=Homo sapiens GN=FLNB PE=1 SV=2 - [FLNB\_HUMAN]  
B0FP48 Uroplakin-3b-like protein OS=Homo sapiens GN=UPK3BL PE=2 SV=1 - [UPK3L\_HUMAN]  
P30483 HLA class I histocompatibility antigen, B-45 alpha chain OS=Homo sapiens GN=HLA-B PE=2 SV=1  
O00560 Syntenin-1 OS=Homo sapiens GN=SDCBP PE=1 SV=1 - [SDCB1\_HUMAN]  
Q9NYQ8 Protocadherin Fat 2 OS=Homo sapiens GN=FAT2 PE=1 SV=2 - [FAT2\_HUMAN]  
Q99436 Proteasome subunit beta type-7 OS=Homo sapiens GN=PSMB7 PE=1 SV=1 - [PSB7\_HUMAN]  
P14868 Aspartyl-tRNA synthetase, cytoplasmic OS=Homo sapiens GN=DARS PE=1 SV=2 - [SYDC\_HUMAN]  
P18206 Vinculin OS=Homo sapiens GN=VCL PE=1 SV=4 - [VINC\_HUMAN]  
P13798 Acylamino-acid-releasing enzyme OS=Homo sapiens GN=APEH PE=1 SV=4 - [ACPH\_HUMAN]  
P24821 Tenascin OS=Homo sapiens GN=TNC PE=1 SV=3 - [TENA\_HUMAN]  
P49721 Proteasome subunit beta type-2 OS=Homo sapiens GN=PSMB2 PE=1 SV=1 - [PSB2\_HUMAN]  
O00231 26S proteasome non-ATPase regulatory subunit 11 OS=Homo sapiens GN=PSMD11 PE=1 SV=3  
Q969P0 Immunoglobulin superfamily member 8 OS=Homo sapiens GN=IGSF8 PE=1 SV=1 - [IGSF8\_HUMAN]  
Q14344 Guanine nucleotide-binding protein subunit alpha-13 OS=Homo sapiens GN=GNA13 PE=1 SV=2  
Q9Y230 RuvB-like 2 OS=Homo sapiens GN=RUVBL2 PE=1 SV=3 - [RUVB2\_HUMAN]  
P63244 Guanine nucleotide-binding protein subunit beta-2-like 1 OS=Homo sapiens GN=GNB2L1 PE=1 SV=3  
P10909 Clusterin OS=Homo sapiens GN=CLU PE=1 SV=1 - [CLUS\_HUMAN]  
Q15063 Periostin OS=Homo sapiens GN=POSTN PE=1 SV=2 - [POSTN\_HUMAN]  
P07305 Histone H1.0 OS=Homo sapiens GN=H1F0 PE=1 SV=3 - [H10\_HUMAN]  
Q9Y678 Coatamer subunit gamma OS=Homo sapiens GN=COPG PE=1 SV=1 - [COPG\_HUMAN]  
P62191 26S protease regulatory subunit 4 OS=Homo sapiens GN=PSMC1 PE=1 SV=1 - [PRS4\_HUMAN]  
P52209 6-phosphogluconate dehydrogenase, decarboxylating OS=Homo sapiens GN=PGD PE=1 SV=3  
O00299 Chloride intracellular channel protein 1 OS=Homo sapiens GN=CLIC1 PE=1 SV=4 - [CLIC1\_HUMAN]  
P20039 HLA class II histocompatibility antigen, DRB1-11 beta chain OS=Homo sapiens GN=HLA-DRB1 PE=1 SV=1  
P01593 Ig kappa chain V-I region AG OS=Homo sapiens PE=1 SV=1 - [KV101\_HUMAN]  
Q16363 Laminin subunit alpha-4 OS=Homo sapiens GN=LAMA4 PE=1 SV=4 - [LAMA4\_HUMAN]  
P06396 Gelsolin OS=Homo sapiens GN=GSN PE=1 SV=1 - [GELS\_HUMAN]  
Q6UVK1 Chondroitin sulfate proteoglycan 4 OS=Homo sapiens GN=CSPG4 PE=1 SV=2 - [CSPG4\_HUMAN]  
Q8NFK5 Retinoic acid-induced protein 3 OS=Homo sapiens GN=GPRC5A PE=1 SV=2 - [RAI3\_HUMAN]  
P19338 Nucleolin OS=Homo sapiens GN=NCL PE=1 SV=3 - [NUCL\_HUMAN]  
Q9P265 Disco-interacting protein 2 homolog B OS=Homo sapiens GN=DIP2B PE=1 SV=3 - [DIP2B\_HUMAN]

P15941 Mucin-1 OS=Homo sapiens GN=MUC1 PE=1 SV=3 - [MUC1\_HUMAN]  
P07814 Bifunctional aminoacyl-tRNA synthetase OS=Homo sapiens GN=EPRS PE=1 SV=5 - [SYEP\_HUMAN]  
Q99460 26S proteasome non-ATPase regulatory subunit 1 OS=Homo sapiens GN=PSMD1 PE=1 SV=2  
P05107 Integrin beta-2 OS=Homo sapiens GN=ITGB2 PE=1 SV=2 - [ITB2\_HUMAN]  
Q9ULA0 Aspartyl aminopeptidase OS=Homo sapiens GN=DNPEP PE=1 SV=1 - [DNPEP\_HUMAN]  
P19823 Inter-alpha-trypsin inhibitor heavy chain H2 OS=Homo sapiens GN=ITIH2 PE=1 SV=2 - [ITIH2\_HUMAN]  
P62333 26S protease regulatory subunit 10B OS=Homo sapiens GN=PSMC6 PE=1 SV=1 - [PRS10\_HUMAN]  
P26641 Elongation factor 1-gamma OS=Homo sapiens GN=EEF1G PE=1 SV=3 - [EF1G\_HUMAN]  
O95436 Sodium-dependent phosphate transport protein 2B OS=Homo sapiens GN=SLC34A2 PE=1 SV=3  
P15924 Desmoplakin OS=Homo sapiens GN=DSP PE=1 SV=3 - [DESP\_HUMAN]  
P07237 Protein disulfide-isomerase OS=Homo sapiens GN=P4HB PE=1 SV=3 - [PDIA1\_HUMAN]  
Q9Y315 Putative deoxyribose-phosphate aldolase OS=Homo sapiens GN=DERA PE=1 SV=2 - [DEOC\_HUMAN]  
P01859 Ig gamma-2 chain C region OS=Homo sapiens GN=IGHG2 PE=1 SV=2 - [IGHG2\_HUMAN]  
O75955 Flotillin-1 OS=Homo sapiens GN=FLOT1 PE=1 SV=3 - [FLOT1\_HUMAN]  
P18124 60S ribosomal protein L7 OS=Homo sapiens GN=RPL7 PE=1 SV=1 - [RL7\_HUMAN]  
P01033 Metalloproteinase inhibitor 1 OS=Homo sapiens GN=TIMP1 PE=1 SV=1 - [TIMP1\_HUMAN]  
Q9Y262 Eukaryotic translation initiation factor 3 subunit L OS=Homo sapiens GN=EIF3L PE=1 SV=1 - [EIF3L\_HUMAN]  
P22735 Protein-glutamine gamma-glutamyltransferase K OS=Homo sapiens GN=TGM1 PE=1 SV=4 - [TGM1\_HUMAN]  
Q9UUK3 Poly [ADP-ribose] polymerase 4 OS=Homo sapiens GN=PARP4 PE=1 SV=3 - [PARP4\_HUMAN]  
P06748 Nucleophosmin OS=Homo sapiens GN=NPM1 PE=1 SV=2 - [NPM\_HUMAN]  
P14780 Matrix metalloproteinase-9 OS=Homo sapiens GN=MMP9 PE=1 SV=3 - [MMP9\_HUMAN]  
P21926 CD9 antigen OS=Homo sapiens GN=CD9 PE=1 SV=4 - [CD9\_HUMAN]  
P06702 Protein S100-A9 OS=Homo sapiens GN=S100A9 PE=1 SV=1 - [S10A9\_HUMAN]  
Q9H9H4 Vacuolar protein sorting-associated protein 37B OS=Homo sapiens GN=VPS37B PE=1 SV=1 - [VP37B\_HUMAN]  
P13796 Plastin-2 OS=Homo sapiens GN=LCP1 PE=1 SV=6 - [PLSL\_HUMAN]  
P14543 Nidogen-1 OS=Homo sapiens GN=NID1 PE=1 SV=3 - [NID1\_HUMAN]  
P28062 Proteasome subunit beta type-8 OS=Homo sapiens GN=PSMB8 PE=1 SV=3 - [PSB8\_HUMAN]  
Q92743 Serine protease HTRA1 OS=Homo sapiens GN=HTRA1 PE=1 SV=1 - [HTRA1\_HUMAN]  
P25391 Laminin subunit alpha-1 OS=Homo sapiens GN=LAMA1 PE=1 SV=2 - [LAMA1\_HUMAN]  
P51148 Ras-related protein Rab-5C OS=Homo sapiens GN=RAB5C PE=1 SV=2 - [RAB5C\_HUMAN]  
P35998 26S protease regulatory subunit 7 OS=Homo sapiens GN=PSMC2 PE=1 SV=3 - [PRS7\_HUMAN]  
P37802 Transgelin-2 OS=Homo sapiens GN=TAGLN2 PE=1 SV=3 - [TAGL2\_HUMAN]  
P61247 40S ribosomal protein S3a OS=Homo sapiens GN=RPS3A PE=1 SV=2 - [RS3A\_HUMAN]  
Q9NZN4 EH domain-containing protein 2 OS=Homo sapiens GN=EHD2 PE=1 SV=2 - [EHD2\_HUMAN]  
P01911 HLA class II histocompatibility antigen, DRB1-15 beta chain OS=Homo sapiens GN=HLA-DRB1 PE=1 SV=2  
P51665 26S proteasome non-ATPase regulatory subunit 7 OS=Homo sapiens GN=PSMD7 PE=1 SV=2  
Q08431 Lactadherin OS=Homo sapiens GN=MFGE8 PE=1 SV=2 - [MFGM\_HUMAN]  
P15088 Mast cell carboxypeptidase A OS=Homo sapiens GN=CPA3 PE=1 SV=2 - [CBPA3\_HUMAN]  
P67809 Nuclease-sensitive element-binding protein 1 OS=Homo sapiens GN=YBX1 PE=1 SV=3 - [YBOX1\_HUMAN]  
P11413 Glucose-6-phosphate 1-dehydrogenase OS=Homo sapiens GN=G6PD PE=1 SV=4 - [G6PD\_HUMAN]  
P12956 X-ray repair cross-complementing protein 6 OS=Homo sapiens GN=XRCC6 PE=1 SV=2 - [XRCC6\_HUMAN]  
Q15582 Transforming growth factor-beta-induced protein ig-h3 OS=Homo sapiens GN=TGFB1 PE=1 SV=1  
P62701 40S ribosomal protein S4, X isoform OS=Homo sapiens GN=RPS4X PE=1 SV=2 - [RS4X\_HUMAN]  
P11279 Lysosome-associated membrane glycoprotein 1 OS=Homo sapiens GN=LAMP1 PE=1 SV=3 - [LAMP1\_HUMAN]  
P62834 Ras-related protein Rap-1A OS=Homo sapiens GN=RAP1A PE=1 SV=1 - [RAP1A\_HUMAN]  
P55290 Cadherin-13 OS=Homo sapiens GN=CDH13 PE=1 SV=1 - [CAD13\_HUMAN]  
Q06830 Peroxiredoxin-1 OS=Homo sapiens GN=PRDX1 PE=1 SV=1 - [PRDX1\_HUMAN]  
P04040 Catalase OS=Homo sapiens GN=CAT PE=1 SV=3 - [CATA\_HUMAN]  
P23528 Cofilin-1 OS=Homo sapiens GN=CFL1 PE=1 SV=3 - [COF1\_HUMAN]  
P02765 Alpha-2-HS-glycoprotein OS=Homo sapiens GN=AHSG PE=1 SV=1 - [FETUA\_HUMAN]  
B9A064 Immunoglobulin lambda-like polypeptide 5 OS=Homo sapiens GN=IGLL5 PE=2 SV=2 - [IGLL5\_HUMAN]  
O95865 N(G),N(G)-dimethylarginine dimethylaminohydrolase 2 OS=Homo sapiens GN=DDAH2 PE=1 SV=1  
Q9Y265 RuvB-like 1 OS=Homo sapiens GN=RUVBL1 PE=1 SV=1 - [RUVB1\_HUMAN]  
P62937 Peptidyl-prolyl cis-trans isomerase A OS=Homo sapiens GN=PPIA PE=1 SV=2 - [PPIA\_HUMAN]  
Q99536 Synaptic vesicle membrane protein VAT-1 homolog OS=Homo sapiens GN=VAT1 PE=1 SV=2 - [VAT1\_HUMAN]  
P37837 Transaldolase OS=Homo sapiens GN=TALDO1 PE=1 SV=2 - [TALDO\_HUMAN]  
P12268 Inosine-5'-monophosphate dehydrogenase 2 OS=Homo sapiens GN=IMPDH2 PE=1 SV=2 - [IMDH2\_HUMAN]  
Q8IZ83 Aldehyde dehydrogenase family 16 member A1 OS=Homo sapiens GN=ALDH16A1 PE=1 SV=2

Q9Y6R7 IgGfC-binding protein OS=Homo sapiens GN=FCGBP PE=1 SV=3 - [FCGBP\_HUMAN]  
 Q99816 Tumor susceptibility gene 101 protein OS=Homo sapiens GN=TSG101 PE=1 SV=2 - [TS101\_HUMAN]  
 Q86YZ3 Hornerin OS=Homo sapiens GN=HRNR PE=1 SV=2 - [HORN\_HUMAN]  
 P09758 Tumor-associated calcium signal transducer 2 OS=Homo sapiens GN=TACSTD2 PE=1 SV=3 - [TACD2\_HUMAN]  
 P08648 Integrin alpha-5 OS=Homo sapiens GN=ITGA5 PE=1 SV=2 - [ITA5\_HUMAN]  
 P51149 Ras-related protein Rab-7a OS=Homo sapiens GN=RAB7A PE=1 SV=1 - [RAB7A\_HUMAN]  
 Q96EY5 Multivesicular body subunit 12A OS=Homo sapiens GN=FAM125A PE=1 SV=1 - [F125A\_HUMAN]  
 O75340 Programmed cell death protein 6 OS=Homo sapiens GN=PDCC6 PE=1 SV=1 - [PDCC6\_HUMAN]  
 P02788 Lactotransferrin OS=Homo sapiens GN=LTF PE=1 SV=6 - [TRFL\_HUMAN]  
 P61204 ADP-ribosylation factor 3 OS=Homo sapiens GN=ARF3 PE=1 SV=2 - [ARF3\_HUMAN]  
 Q04828 Aldo-keto reductase family 1 member C1 OS=Homo sapiens GN=AKR1C1 PE=1 SV=1 - [AK1C1\_HUMAN]  
 P00367 Glutamate dehydrogenase 1, mitochondrial OS=Homo sapiens GN=GLUD1 PE=1 SV=2 - [DHE3\_HUMAN]  
 O00232 26S proteasome non-ATPase regulatory subunit 12 OS=Homo sapiens GN=PSMD12 PE=1 SV=3  
 Q9UK41 Vacuolar protein sorting-associated protein 28 homolog OS=Homo sapiens GN=VPS28 PE=1 SV=1  
 P62158 Calmodulin OS=Homo sapiens GN=CALM1 PE=1 SV=2 - [CALM\_HUMAN]  
 P49006 MARCKS-related protein OS=Homo sapiens GN=MARCKSL1 PE=1 SV=2 - [MRP\_HUMAN]  
 P23526 Adenosylhomocysteinase OS=Homo sapiens GN=AHCY PE=1 SV=4 - [SAHH\_HUMAN]  
 P23142 Fibulin-1 OS=Homo sapiens GN=FBLN1 PE=1 SV=4 - [FBLN1\_HUMAN]  
 P53621 Coatamer subunit alpha OS=Homo sapiens GN=COPA PE=1 SV=2 - [COPA\_HUMAN]  
 Q86YQ8 Copine-8 OS=Homo sapiens GN=CPNE8 PE=1 SV=2 - [CPNE8\_HUMAN]  
 P35221 Catenin alpha-1 OS=Homo sapiens GN=CTNNA1 PE=1 SV=1 - [CTNA1\_HUMAN]  
 Q07020 60S ribosomal protein L18 OS=Homo sapiens GN=RPL18 PE=1 SV=2 - [RL18\_HUMAN]  
 Q92930 Ras-related protein Rab-8B OS=Homo sapiens GN=RAB8B PE=1 SV=2 - [RAB8B\_HUMAN]  
 P29144 Tripeptidyl-peptidase 2 OS=Homo sapiens GN=TPP2 PE=1 SV=4 - [TPP2\_HUMAN]  
 P62820 Ras-related protein Rab-1A OS=Homo sapiens GN=RAB1A PE=1 SV=3 - [RAB1A\_HUMAN]  
 O00487 26S proteasome non-ATPase regulatory subunit 14 OS=Homo sapiens GN=PSMD14 PE=1 SV=1  
 Q9UNM6 26S proteasome non-ATPase regulatory subunit 13 OS=Homo sapiens GN=PSMD13 PE=1 SV=2  
 P15880 40S ribosomal protein S2 OS=Homo sapiens GN=RPS2 PE=1 SV=2 - [RS2\_HUMAN]  
 P30740 Leukocyte elastase inhibitor OS=Homo sapiens GN=SERPINB1 PE=1 SV=1 - [ILEU\_HUMAN]  
 P31949 Protein S100-A11 OS=Homo sapiens GN=S100A11 PE=1 SV=2 - [S10AB\_HUMAN]  
 P31939 Bifunctional purine biosynthesis protein PURH OS=Homo sapiens GN=ATIC PE=1 SV=3 - [PUR9\_HUMAN]  
 Q13867 Bleomycin hydrolase OS=Homo sapiens GN=BLMH PE=1 SV=1 - [BLMH\_HUMAN]  
 P43121 Cell surface glycoprotein MUC18 OS=Homo sapiens GN=MCAM PE=1 SV=2 - [MUC18\_HUMAN]  
 Q14112 Nidogen-2 OS=Homo sapiens GN=NID2 PE=1 SV=3 - [NID2\_HUMAN]  
 Q9HCY8 Protein S100-A14 OS=Homo sapiens GN=S100A14 PE=1 SV=1 - [S10AE\_HUMAN]  
 Q8WWI5 Choline transporter-like protein 1 OS=Homo sapiens GN=SLC44A1 PE=1 SV=1 - [CTL1\_HUMAN]  
 P50395 Rab GDP dissociation inhibitor beta OS=Homo sapiens GN=GDI2 PE=1 SV=2 - [GDIB\_HUMAN]  
 P09972 Fructose-bisphosphate aldolase C OS=Homo sapiens GN=ALDOC PE=1 SV=2 - [ALDOC\_HUMAN]  
 P62424 60S ribosomal protein L7a OS=Homo sapiens GN=RPL7A PE=1 SV=2 - [RL7A\_HUMAN]  
 Q9H444 Charged multivesicular body protein 4b OS=Homo sapiens GN=CHMP4B PE=1 SV=1 - [CHM4B\_HUMAN]  
 Q12884 Seprase OS=Homo sapiens GN=FAP PE=1 SV=5 - [SEPR\_HUMAN]  
 P46940 Ras GTPase-activating-like protein IQGAP1 OS=Homo sapiens GN=IQGAP1 PE=1 SV=1 - [IQGA1\_HUMAN]  
 Q8N512 Arrestin domain-containing protein 1 OS=Homo sapiens GN=ARRDC1 PE=2 SV=1 - [ARRD1\_HUMAN]  
 O14672 Disintegrin and metalloproteinase domain-containing protein 10 OS=Homo sapiens GN=ADAM10 PE=1 SV=1  
 Q02388 Collagen alpha-1(VII) chain OS=Homo sapiens GN=COL7A1 PE=1 SV=2 - [CO7A1\_HUMAN]  
 P61158 Actin-related protein 3 OS=Homo sapiens GN=ACTR3 PE=1 SV=3 - [ARP3\_HUMAN]  
 P07954 Fumarate hydratase, mitochondrial OS=Homo sapiens GN=FB PE=1 SV=3 - [FUMH\_HUMAN]  
 Q9BT78 COP9 signalosome complex subunit 4 OS=Homo sapiens GN=COPS4 PE=1 SV=1 - [CSN4\_HUMAN]  
 P08311 Cathepsin G OS=Homo sapiens GN=CTSG PE=1 SV=2 - [CATG\_HUMAN]  
 P20701 Integrin alpha-L OS=Homo sapiens GN=ITGAL PE=1 SV=3 - [ITAL\_HUMAN]  
 P59998 Actin-related protein 2/3 complex subunit 4 OS=Homo sapiens GN=ARPC4 PE=1 SV=3 - [ARPC4\_HUMAN]  
 P36578 60S ribosomal protein L4 OS=Homo sapiens GN=RPL4 PE=1 SV=5 - [RL4\_HUMAN]  
 P40121 Macrophage-capping protein OS=Homo sapiens GN=CAPG PE=1 SV=2 - [CAPG\_HUMAN]  
 Q01518 Adenylyl cyclase-associated protein 1 OS=Homo sapiens GN=CAP1 PE=1 SV=5 - [CAP1\_HUMAN]  
 P12004 Proliferating cell nuclear antigen OS=Homo sapiens GN=PCNA PE=1 SV=1 - [PCNA\_HUMAN]  
 P41250 Glycyl-tRNA synthetase OS=Homo sapiens GN=GARS PE=1 SV=3 - [SYG\_HUMAN]  
 Q86X29 Lipolysis-stimulated lipoprotein receptor OS=Homo sapiens GN=LSR PE=1 SV=4 - [LSR\_HUMAN]  
 Q16658 Fascin OS=Homo sapiens GN=FSCN1 PE=1 SV=3 - [FSCN1\_HUMAN]

P40306 Proteasome subunit beta type-10 OS=Homo sapiens GN=PSMB10 PE=1 SV=1 - [PSB10\_HUMAN]  
P11216 Glycogen phosphorylase, brain form OS=Homo sapiens GN=PYGB PE=1 SV=5 - [PYGB\_HUMAN]  
P30101 Protein disulfide-isomerase A3 OS=Homo sapiens GN=PDIA3 PE=1 SV=4 - [PDIA3\_HUMAN]  
P61006 Ras-related protein Rab-8A OS=Homo sapiens GN=RAB8A PE=1 SV=1 - [RAB8A\_HUMAN]  
P05387 60S acidic ribosomal protein P2 OS=Homo sapiens GN=RPLP2 PE=1 SV=1 - [RLA2\_HUMAN]  
P52907 F-actin-capping protein subunit alpha-1 OS=Homo sapiens GN=CAPZA1 PE=1 SV=3 - [CAZA1\_HUMAN]  
P16152 Carbonyl reductase [NADPH] 1 OS=Homo sapiens GN=CBR1 PE=1 SV=3 - [CBR1\_HUMAN]  
P11233 Ras-related protein Ral-A OS=Homo sapiens GN=RALA PE=1 SV=1 - [RALA\_HUMAN]  
P10809 60 kDa heat shock protein, mitochondrial OS=Homo sapiens GN=HSPD1 PE=1 SV=2 - [CH60\_HUMAN]  
P62328 Thymosin beta-4 OS=Homo sapiens GN=TMSB4X PE=1 SV=2 - [TYB4\_HUMAN]  
P39023 60S ribosomal protein L3 OS=Homo sapiens GN=RPL3 PE=1 SV=2 - [RL3\_HUMAN]  
Q14956 Transmembrane glycoprotein NMB OS=Homo sapiens GN=GPNMB PE=1 SV=2 - [GPNMB\_HUMAN]  
P01598 Ig kappa chain V-I region EU OS=Homo sapiens PE=1 SV=1 - [KV106\_HUMAN]  
P55884 Eukaryotic translation initiation factor 3 subunit B OS=Homo sapiens GN=EIF3B PE=1 SV=3 - [EIF3B\_HUMAN]  
P30153 Serine/threonine-protein phosphatase 2A 65 kDa regulatory subunit A alpha isoform OS=Homo sapiens  
P29317 Ephrin type-A receptor 2 OS=Homo sapiens GN=EPHA2 PE=1 SV=2 - [EPHA2\_HUMAN]  
P60660 Myosin light polypeptide 6 OS=Homo sapiens GN=MYL6 PE=1 SV=2 - [MYL6\_HUMAN]  
P52566 Rho GDP-dissociation inhibitor 2 OS=Homo sapiens GN=ARHGDI2 PE=1 SV=3 - [GDIR2\_HUMAN]  
P23284 Peptidyl-prolyl cis-trans isomerase B OS=Homo sapiens GN=PPIB PE=1 SV=2 - [PPIB\_HUMAN]  
Q8TF72 Protein Shroom3 OS=Homo sapiens GN=SHROOM3 PE=1 SV=2 - [SHRM3\_HUMAN]  
Q15008 26S proteasome non-ATPase regulatory subunit 6 OS=Homo sapiens GN=PSMD6 PE=1 SV=1  
Q9NT68 Teneurin-2 OS=Homo sapiens GN=ODZ2 PE=1 SV=3 - [TEN2\_HUMAN]  
P62249 40S ribosomal protein S16 OS=Homo sapiens GN=RPS16 PE=1 SV=2 - [RS16\_HUMAN]  
P15259 Phosphoglycerate mutase 2 OS=Homo sapiens GN=PGAM2 PE=1 SV=3 - [PGAM2\_HUMAN]  
Q14974 Importin subunit beta-1 OS=Homo sapiens GN=KPNB1 PE=1 SV=2 - [IMB1\_HUMAN]  
P21281 V-type proton ATPase subunit B, brain isoform OS=Homo sapiens GN=ATP6V1B2 PE=1 SV=3  
P61160 Actin-related protein 2 OS=Homo sapiens GN=ACTR2 PE=1 SV=1 - [ARP2\_HUMAN]  
P35555 Fibrillin-1 OS=Homo sapiens GN=FBN1 PE=1 SV=3 - [FBN1\_HUMAN]  
P47755 F-actin-capping protein subunit alpha-2 OS=Homo sapiens GN=CAPZA2 PE=1 SV=3 - [CAZA2\_HUMAN]  
P13010 X-ray repair cross-complementing protein 5 OS=Homo sapiens GN=XRCC5 PE=1 SV=3 - [XRCC5\_HUMAN]  
O14745 Na(+)/H(+) exchange regulatory cofactor NHE-RF1 OS=Homo sapiens GN=SLC9A3R1 PE=1 SV=4  
P06454 Prothymosin alpha OS=Homo sapiens GN=PTMA PE=1 SV=2 - [PTMA\_HUMAN]  
P62491 Ras-related protein Rab-11A OS=Homo sapiens GN=RAB11A PE=1 SV=3 - [RB11A\_HUMAN]  
P62269 40S ribosomal protein S18 OS=Homo sapiens GN=RPS18 PE=1 SV=3 - [RS18\_HUMAN]  
Q6YHK3 CD109 antigen OS=Homo sapiens GN=CD109 PE=1 SV=2 - [CD109\_HUMAN]  
P36955 Pigment epithelium-derived factor OS=Homo sapiens GN=SERPINF1 PE=1 SV=4 - [PEDF\_HUMAN]  
P26373 60S ribosomal protein L13 OS=Homo sapiens GN=RPL13 PE=1 SV=4 - [RL13\_HUMAN]  
P01861 Ig gamma-4 chain C region OS=Homo sapiens GN=IGHG4 PE=1 SV=1 - [IGHG4\_HUMAN]  
Q9Y3F4 Serine-threonine kinase receptor-associated protein OS=Homo sapiens GN=STRAP PE=1 SV=1  
P54136 Arginyl-tRNA synthetase, cytoplasmic OS=Homo sapiens GN=RARS PE=1 SV=2 - [SYRC\_HUMAN]  
P13667 Protein disulfide-isomerase A4 OS=Homo sapiens GN=PDIA4 PE=1 SV=2 - [PDIA4\_HUMAN]  
Q9UN37 Vacuolar protein sorting-associated protein 4A OS=Homo sapiens GN=VPS4A PE=1 SV=1 - [VPS4A\_HUMAN]  
P05388 60S acidic ribosomal protein P0 OS=Homo sapiens GN=RPLP0 PE=1 SV=1 - [RLA0\_HUMAN]  
Q02413 Desmoglein-1 OS=Homo sapiens GN=DSG1 PE=1 SV=2 - [DSG1\_HUMAN]  
P02787 Serotransferrin OS=Homo sapiens GN=TF PE=1 SV=3 - [TRFE\_HUMAN]  
P61225 Ras-related protein Rap-2b OS=Homo sapiens GN=RAP2B PE=1 SV=1 - [RAP2B\_HUMAN]  
P46777 60S ribosomal protein L5 OS=Homo sapiens GN=RPL5 PE=1 SV=3 - [RL5\_HUMAN]  
P13489 Ribonuclease inhibitor OS=Homo sapiens GN=RNH1 PE=1 SV=2 - [RINI\_HUMAN]  
P00488 Coagulation factor XIII A chain OS=Homo sapiens GN=F13A1 PE=1 SV=4 - [F13A\_HUMAN]  
P35222 Catenin beta-1 OS=Homo sapiens GN=CTNNB1 PE=1 SV=1 - [CTNB1\_HUMAN]  
P38919 Eukaryotic initiation factor 4A-III OS=Homo sapiens GN=EIF4A3 PE=1 SV=4 - [IF4A3\_HUMAN]  
P01920 HLA class II histocompatibility antigen, DQ beta 1 chain OS=Homo sapiens GN=HLA-DQB1 PE=1 SV=2  
P38606 V-type proton ATPase catalytic subunit A OS=Homo sapiens GN=ATP6V1A PE=1 SV=2 - [VATA\_HUMAN]  
Q9Y490 Talin-1 OS=Homo sapiens GN=TLN1 PE=1 SV=3 - [TLN1\_HUMAN]  
P62070 Ras-related protein R-Ras2 OS=Homo sapiens GN=RRAS2 PE=1 SV=1 - [RRAS2\_HUMAN]  
P61163 Alpha-centractin OS=Homo sapiens GN=ACTR1A PE=1 SV=1 - [ACTZ\_HUMAN]  
Q16853 Membrane primary amine oxidase OS=Homo sapiens GN=AOC3 PE=1 SV=3 - [AOC3\_HUMAN]  
O00159 Myosin-Ic OS=Homo sapiens GN=MYO1C PE=1 SV=4 - [MYO1C\_HUMAN]

P35606 Coatomer subunit beta' OS=Homo sapiens GN=COPB2 PE=1 SV=2 - [COPB2\_HUMAN]  
Q9UBV8 Peflin OS=Homo sapiens GN=PEF1 PE=1 SV=1 - [PEF1\_HUMAN]  
P09382 Galectin-1 OS=Homo sapiens GN=LGALS1 PE=1 SV=2 - [LEG1\_HUMAN]  
P26022 Pentraxin-related protein PTX3 OS=Homo sapiens GN=PTX3 PE=1 SV=3 - [PTX3\_HUMAN]  
Q00577 Transcriptional activator protein Pur-alpha OS=Homo sapiens GN=PURA PE=1 SV=2 - [PURA\_HUMAN]  
P62873 Guanine nucleotide-binding protein G(I)/G(S)/G(T) subunit beta-1 OS=Homo sapiens GN=GNB1 PE=1 SV=3  
P15531 Nucleoside diphosphate kinase A OS=Homo sapiens GN=NME1 PE=1 SV=1 - [NDKA\_HUMAN]  
P09871 Complement C1s subcomponent OS=Homo sapiens GN=C1S PE=1 SV=1 - [C1S\_HUMAN]  
P40925 Malate dehydrogenase, cytoplasmic OS=Homo sapiens GN=MDH1 PE=1 SV=4 - [MDHC\_HUMAN]  
P11586 C-1-tetrahydrofolate synthase, cytoplasmic OS=Homo sapiens GN=MTHFD1 PE=1 SV=3 - [C1TC\_HUMAN]  
P47756 F-actin-capping protein subunit beta OS=Homo sapiens GN=CAPZB PE=1 SV=4 - [CAPZB\_HUMAN]  
Q96QK1 Vacuolar protein sorting-associated protein 35 OS=Homo sapiens GN=VPS35 PE=1 SV=2 - [VPS35\_HUMAN]  
P62854 40S ribosomal protein S26 OS=Homo sapiens GN=RPS26 PE=1 SV=3 - [RS26\_HUMAN]  
Q14103 Heterogeneous nuclear ribonucleoprotein D0 OS=Homo sapiens GN=HNRNPD PE=1 SV=1 - [HNRNPD\_HUMAN]  
P10599 Thioredoxin OS=Homo sapiens GN=TXN PE=1 SV=3 - [THIO\_HUMAN]  
P06737 Glycogen phosphorylase, liver form OS=Homo sapiens GN=PYGL PE=1 SV=4 - [PYGL\_HUMAN]  
P20340 Ras-related protein Rab-6A OS=Homo sapiens GN=RAB6A PE=1 SV=3 - [RAB6A\_HUMAN]  
O95819 Mitogen-activated protein kinase kinase kinase 4 OS=Homo sapiens GN=MAP4K4 PE=1 SV=2  
O43795 Myosin-Ib OS=Homo sapiens GN=MYO1B PE=1 SV=3 - [MYO1B\_HUMAN]  
P36952 Serpin B5 OS=Homo sapiens GN=SERPINB5 PE=1 SV=2 - [SPB5\_HUMAN]  
O75874 Isocitrate dehydrogenase [NADP] cytoplasmic OS=Homo sapiens GN=IDH1 PE=1 SV=2 - [IDHC\_HUMAN]  
Q92542 Nicastrin OS=Homo sapiens GN=NCSTN PE=1 SV=2 - [NICA\_HUMAN]  
P00738 Haptoglobin OS=Homo sapiens GN=HP PE=1 SV=1 - [HPT\_HUMAN]  
Q9H190 Syntenin-2 OS=Homo sapiens GN=SDCBP2 PE=2 SV=2 - [SDCB2\_HUMAN]  
P0C0L4 Complement C4-A OS=Homo sapiens GN=C4A PE=1 SV=1 - [CO4A\_HUMAN]  
P62847 40S ribosomal protein S24 OS=Homo sapiens GN=RPS24 PE=1 SV=1 - [RS24\_HUMAN]  
Q16222 UDP-N-acetylhexosamine pyrophosphorylase OS=Homo sapiens GN=UAP1 PE=1 SV=3 - [UAP1\_HUMAN]  
P41091 Eukaryotic translation initiation factor 2 subunit 3 OS=Homo sapiens GN=EIF2S3 PE=1 SV=3 - [IF2G\_HUMAN]  
P05026 Sodium/potassium-transporting ATPase subunit beta-1 OS=Homo sapiens GN=ATP1B1 PE=1 SV=1  
P35442 Thrombospondin-2 OS=Homo sapiens GN=THBS2 PE=1 SV=2 - [TSP2\_HUMAN]  
P43686 26S protease regulatory subunit 6B OS=Homo sapiens GN=PSMC4 PE=1 SV=2 - [PRS6B\_HUMAN]  
Q16531 DNA damage-binding protein 1 OS=Homo sapiens GN=DDB1 PE=1 SV=1 - [DDB1\_HUMAN]  
Q9Y3L5 Ras-related protein Rap-2c OS=Homo sapiens GN=RAP2C PE=1 SV=1 - [RAP2C\_HUMAN]  
Q5D862 Filaggrin-2 OS=Homo sapiens GN=FLG2 PE=1 SV=1 - [FILA2\_HUMAN]  
Q96S97 Myeloid-associated differentiation marker OS=Homo sapiens GN=MYADM PE=1 SV=2 - [MYADM\_HUMAN]  
P41252 Isoleucyl-tRNA synthetase, cytoplasmic OS=Homo sapiens GN=IARS PE=1 SV=2 - [SYIC\_HUMAN]  
P01130 Low-density lipoprotein receptor OS=Homo sapiens GN=LDLR PE=1 SV=1 - [LDLR\_HUMAN]  
P62942 Peptidyl-prolyl cis-trans isomerase FKBP1A OS=Homo sapiens GN=FKBP1A PE=1 SV=2 - [FKB1A\_HUMAN]  
Q7KZF4 Staphylococcal nuclease domain-containing protein 1 OS=Homo sapiens GN=SND1 PE=1 SV=1  
O15145 Actin-related protein 2/3 complex subunit 3 OS=Homo sapiens GN=ARPC3 PE=1 SV=3 - [ARPC3\_HUMAN]  
Q96CX2 BTB/POZ domain-containing protein KCTD12 OS=Homo sapiens GN=KCTD12 PE=1 SV=1 - [KCD12\_HUMAN]  
P11166 Solute carrier family 2, facilitated glucose transporter member 1 OS=Homo sapiens GN=SLC2A1 PE=1 SV=2  
Q5S2K8 FRAS1-related extracellular matrix protein 2 OS=Homo sapiens GN=FREM2 PE=1 SV=2 - [FREM2\_HUMAN]  
Q9UQ80 Proliferation-associated protein 2G4 OS=Homo sapiens GN=PA2G4 PE=1 SV=3 - [PA2G4\_HUMAN]  
P63151 Serine/threonine-protein phosphatase 2A 55 kDa regulatory subunit B alpha isoform OS=Homo sapiens  
Q01105 Protein SET OS=Homo sapiens GN=SET PE=1 SV=3 - [SET\_HUMAN]  
Q92597 Protein NDRG1 OS=Homo sapiens GN=NDRG1 PE=1 SV=1 - [NDRG1\_HUMAN]  
P07910 Heterogeneous nuclear ribonucleoproteins C1/C2 OS=Homo sapiens GN=HNRNPC PE=1 SV=4  
P67936 Tropomyosin alpha-4 chain OS=Homo sapiens GN=TPM4 PE=1 SV=3 - [TPM4\_HUMAN]  
P20702 Integrin alpha-X OS=Homo sapiens GN=ITGAX PE=1 SV=3 - [ITAX\_HUMAN]  
Q15286 Ras-related protein Rab-35 OS=Homo sapiens GN=RAB35 PE=1 SV=1 - [RAB35\_HUMAN]  
Q9NUQ9 Protein FAM49B OS=Homo sapiens GN=FAM49B PE=1 SV=1 - [FA49B\_HUMAN]  
Q99873 Protein arginine N-methyltransferase 1 OS=Homo sapiens GN=PRMT1 PE=1 SV=2 - [ANM1\_HUMAN]  
Q01813 6-phosphofructokinase type C OS=Homo sapiens GN=PFKP PE=1 SV=2 - [K6PP\_HUMAN]  
P19105 Myosin regulatory light chain 12A OS=Homo sapiens GN=MYL12A PE=1 SV=2 - [ML12A\_HUMAN]  
Q96TA1 Niban-like protein 1 OS=Homo sapiens GN=FAM129B PE=1 SV=3 - [NIBL1\_HUMAN]  
P41218 Myeloid cell nuclear differentiation antigen OS=Homo sapiens GN=MNDA PE=1 SV=1 - [MNDA\_HUMAN]  
P62913 60S ribosomal protein L11 OS=Homo sapiens GN=RPL11 PE=1 SV=2 - [RL11\_HUMAN]



P18621 60S ribosomal protein L17 OS=Homo sapiens GN=RPL17 PE=1 SV=3 - [RL17\_HUMAN]  
P27635 60S ribosomal protein L10 OS=Homo sapiens GN=RPL10 PE=1 SV=4 - [RL10\_HUMAN]  
P27482 Calmodulin-like protein 3 OS=Homo sapiens GN=CALML3 PE=1 SV=2 - [CALL3\_HUMAN]  
P31153 S-adenosylmethionine synthase isoform type-2 OS=Homo sapiens GN=MAT2A PE=1 SV=1 - [METK2\_HUMAN]  
P01909 HLA class II histocompatibility antigen, DQ alpha 1 chain OS=Homo sapiens GN=HLA-DQA1 PE=1 SV=1  
O15144 Actin-related protein 2/3 complex subunit 2 OS=Homo sapiens GN=ARPC2 PE=1 SV=1 - [ARPC2\_HUMAN]  
P27797 Calreticulin OS=Homo sapiens GN=CALR PE=1 SV=1 - [CALR\_HUMAN]  
P01040 Cystatin-A OS=Homo sapiens GN=CSTA PE=1 SV=1 - [CYTA\_HUMAN]  
P50148 Guanine nucleotide-binding protein G(q) subunit alpha OS=Homo sapiens GN=GNAQ PE=1 SV=4  
Q7L2H7 Eukaryotic translation initiation factor 3 subunit M OS=Homo sapiens GN=EIF3M PE=1 SV=1  
P62826 GTP-binding nuclear protein Ran OS=Homo sapiens GN=RAN PE=1 SV=3 - [RAN\_HUMAN]  
P42224 Signal transducer and activator of transcription 1-alpha/beta OS=Homo sapiens GN=STAT1 PE=1 SV=2  
Q13263 Transcription intermediary factor 1-beta OS=Homo sapiens GN=TRIM28 PE=1 SV=5 - [TIF1B\_HUMAN]  
P60953 Cell division control protein 42 homolog OS=Homo sapiens GN=CDC42 PE=1 SV=2 - [CDC42\_HUMAN]  
P13473 Lysosome-associated membrane glycoprotein 2 OS=Homo sapiens GN=LAMP2 PE=1 SV=2 - [LAMP2\_HUMAN]  
P00491 Purine nucleoside phosphorylase OS=Homo sapiens GN=PNP PE=1 SV=2 - [PNPH\_HUMAN]  
P46781 40S ribosomal protein S9 OS=Homo sapiens GN=RPS9 PE=1 SV=3 - [RS9\_HUMAN]  
P62753 40S ribosomal protein S6 OS=Homo sapiens GN=RPS6 PE=1 SV=1 - [RS6\_HUMAN]  
Q9H0E2 Toll-interacting protein OS=Homo sapiens GN=TOLLIP PE=1 SV=1 - [TOLIP\_HUMAN]  
O15143 Actin-related protein 2/3 complex subunit 1B OS=Homo sapiens GN=ARPC1B PE=1 SV=3 - [ARC1B\_HUMAN]  
Q5T4S7 E3 ubiquitin-protein ligase UBR4 OS=Homo sapiens GN=UBR4 PE=1 SV=1 - [UBR4\_HUMAN]  
Q01082 Spectrin beta chain, brain 1 OS=Homo sapiens GN=SPTBN1 PE=1 SV=2 - [SPTB2\_HUMAN]  
O75351 Vacuolar protein sorting-associated protein 4B OS=Homo sapiens GN=VPS4B PE=1 SV=2 - [VPS4B\_HUMAN]  
Q14254 Flotillin-2 OS=Homo sapiens GN=FLOT2 PE=1 SV=2 - [FLOT2\_HUMAN]  
A6NGU5 Putative gamma-glutamyltranspeptidase 3 OS=Homo sapiens GN=GGT3P PE=5 SV=2 - [GGT3\_HUMAN]  
P16671 Platelet glycoprotein 4 OS=Homo sapiens GN=CD36 PE=1 SV=2 - [CD36\_HUMAN]  
P06126 T-cell surface glycoprotein CD1a OS=Homo sapiens GN=CD1A PE=1 SV=4 - [CD1A\_HUMAN]  
P15559 NAD(P)H dehydrogenase [quinone] 1 OS=Homo sapiens GN=NQO1 PE=1 SV=1 - [NQO1\_HUMAN]  
P55036 26S proteasome non-ATPase regulatory subunit 4 OS=Homo sapiens GN=PSMD4 PE=1 SV=1  
A5D8V6 Vacuolar protein sorting-associated protein 37C OS=Homo sapiens GN=VPS37C PE=1 SV=2  
P09960 Leukotriene A-4 hydrolase OS=Homo sapiens GN=LTA4H PE=1 SV=2 - [LKHA4\_HUMAN]  
P31146 Coronin-1A OS=Homo sapiens GN=CORO1A PE=1 SV=4 - [COR1A\_HUMAN]  
P08123 Collagen alpha-2(I) chain OS=Homo sapiens GN=COL1A2 PE=1 SV=7 - [CO1A2\_HUMAN]  
P08473 Nephrilysin OS=Homo sapiens GN=MME PE=1 SV=2 - [NEP\_HUMAN]  
P13497 Bone morphogenetic protein 1 OS=Homo sapiens GN=BMP1 PE=1 SV=2 - [BMP1\_HUMAN]  
Q9P246 Stromal interaction molecule 2 OS=Homo sapiens GN=STIM2 PE=1 SV=2 - [STIM2\_HUMAN]  
Q08722 Leukocyte surface antigen CD47 OS=Homo sapiens GN=CD47 PE=1 SV=1 - [CD47\_HUMAN]  
P31943 Heterogeneous nuclear ribonucleoprotein H OS=Homo sapiens GN=HNRNPH1 PE=1 SV=4 - [HNRH1\_HUMAN]  
Q14697 Neutral alpha-glucosidase AB OS=Homo sapiens GN=GANAB PE=1 SV=3 - [GANAB\_HUMAN]  
Q16555 Dihydropyrimidinase-related protein 2 OS=Homo sapiens GN=DPYSL2 PE=1 SV=1 - [DPYL2\_HUMAN]  
P00505 Aspartate aminotransferase, mitochondrial OS=Homo sapiens GN=GOT2 PE=1 SV=3 - [AATM\_HUMAN]  
P63000 Ras-related C3 botulinum toxin substrate 1 OS=Homo sapiens GN=RAC1 PE=1 SV=1 - [RAC1\_HUMAN]  
O75531 Barrier-to-autointegration factor OS=Homo sapiens GN=BANF1 PE=1 SV=1 - [BAF\_HUMAN]  
P26639 Threonyl-tRNA synthetase, cytoplasmic OS=Homo sapiens GN=TARS PE=1 SV=3 - [SYTC\_HUMAN]  
P31150 Rab GDP dissociation inhibitor alpha OS=Homo sapiens GN=GDI1 PE=1 SV=2 - [GDIA\_HUMAN]  
P08572 Collagen alpha-2(IV) chain OS=Homo sapiens GN=COL4A2 PE=1 SV=4 - [CO4A2\_HUMAN]  
P46926 Glucosamine-6-phosphate isomerase 1 OS=Homo sapiens GN=GNPDA1 PE=1 SV=1 - [GNP1\_HUMAN]  
Q15436 Protein transport protein Sec23A OS=Homo sapiens GN=SEC23A PE=1 SV=2 - [SC23A\_HUMAN]  
Q13347 Eukaryotic translation initiation factor 3 subunit I OS=Homo sapiens GN=EIF3I PE=1 SV=1 - [EIF3I\_HUMAN]  
Q9H299 SH3 domain-binding glutamic acid-rich-like protein 3 OS=Homo sapiens GN=SH3BGL3 PE=1 SV=1  
P01112 GTPase HRas OS=Homo sapiens GN=HRAS PE=1 SV=1 - [RASH\_HUMAN]  
P53618 Coatamer subunit beta OS=Homo sapiens GN=COPB1 PE=1 SV=3 - [COPB\_HUMAN]  
O00154 Cytosolic acyl coenzyme A thioester hydrolase OS=Homo sapiens GN=ACOT7 PE=1 SV=3 - [BACH\_HUMAN]  
P33176 Kinesin-1 heavy chain OS=Homo sapiens GN=KIF5B PE=1 SV=1 - [KINH\_HUMAN]  
Q13765 Nascent polypeptide-associated complex subunit alpha OS=Homo sapiens GN=NACA PE=1 SV=1  
Q8IZP9 G-protein coupled receptor 64 OS=Homo sapiens GN=GPR64 PE=1 SV=2 - [GPR64\_HUMAN]  
P34932 Heat shock 70 kDa protein 4 OS=Homo sapiens GN=HSPA4 PE=1 SV=4 - [HSP74\_HUMAN]  
P69905 Hemoglobin subunit alpha OS=Homo sapiens GN=HBA1 PE=1 SV=2 - [HBA\_HUMAN]

Q09666 Neuroblast differentiation-associated protein AHNAK OS=Homo sapiens GN=AHNAK PE=1 SV=2  
Q14203 Dynactin subunit 1 OS=Homo sapiens GN=DCTN1 PE=1 SV=3 - [DCTN1\_HUMAN]  
P59665 Neutrophil defensin 1 OS=Homo sapiens GN=DEFA1 PE=1 SV=1 - [DEF1\_HUMAN]  
Q99961 Endophilin-A2 OS=Homo sapiens GN=SH3GL1 PE=1 SV=1 - [SH3G1\_HUMAN]  
P05198 Eukaryotic translation initiation factor 2 subunit 1 OS=Homo sapiens GN=EIF2S1 PE=1 SV=3 - [IF2A\_HUMAN]  
P21730 C5a anaphylatoxin chemotactic receptor OS=Homo sapiens GN=C5AR1 PE=1 SV=2 - [C5AR\_HUMAN]  
P06576 ATP synthase subunit beta, mitochondrial OS=Homo sapiens GN=ATP5B PE=1 SV=3 - [ATPB\_HUMAN]  
Q9NZZ3 Charged multivesicular body protein 5 OS=Homo sapiens GN=CHMP5 PE=1 SV=1 - [CHMP5\_HUMAN]  
P50281 Matrix metalloproteinase-14 OS=Homo sapiens GN=MMP14 PE=1 SV=3 - [MMP14\_HUMAN]  
P50914 60S ribosomal protein L14 OS=Homo sapiens GN=RPL14 PE=1 SV=4 - [RL14\_HUMAN]  
P19971 Thymidine phosphorylase OS=Homo sapiens GN=TYMP PE=1 SV=2 - [TYPH\_HUMAN]  
Q9BY43 Charged multivesicular body protein 4a OS=Homo sapiens GN=CHMP4A PE=1 SV=3 - [CHM4A\_HUMAN]  
P15121 Aldose reductase OS=Homo sapiens GN=AKR1B1 PE=1 SV=3 - [ALDR\_HUMAN]  
Q5ZPR3 CD276 antigen OS=Homo sapiens GN=CD276 PE=1 SV=1 - [CD276\_HUMAN]  
Q15631 Translin OS=Homo sapiens GN=TSN PE=1 SV=1 - [TSN\_HUMAN]  
P07384 Calpain-1 catalytic subunit OS=Homo sapiens GN=CAPN1 PE=1 SV=1 - [CAN1\_HUMAN]  
P18084 Integrin beta-5 OS=Homo sapiens GN=ITGB5 PE=1 SV=1 - [ITB5\_HUMAN]  
O00303 Eukaryotic translation initiation factor 3 subunit F OS=Homo sapiens GN=EIF3F PE=1 SV=1 - [EIF3F\_HUMAN]  
Q99598 Translin-associated protein X OS=Homo sapiens GN=TSNAX PE=1 SV=1 - [TSNAX\_HUMAN]  
Q7LBR1 Charged multivesicular body protein 1b OS=Homo sapiens GN=CHMP1B PE=1 SV=1 - [CHM1B\_HUMAN]  
P46063 ATP-dependent DNA helicase Q1 OS=Homo sapiens GN=RECQL PE=1 SV=3 - [RECQ1\_HUMAN]  
O43760 Synaptogyrin-2 OS=Homo sapiens GN=SYNGR2 PE=1 SV=1 - [SNG2\_HUMAN]  
Q08257 Quinone oxidoreductase OS=Homo sapiens GN=CRYZ PE=1 SV=1 - [QOR\_HUMAN]  
P12931 Proto-oncogene tyrosine-protein kinase Src OS=Homo sapiens GN=SRC PE=1 SV=3 - [SRC\_HUMAN]  
P30419 Glycylpeptide N-tetradecanoyltransferase 1 OS=Homo sapiens GN=NMT1 PE=1 SV=2 - [NMT1\_HUMAN]  
P29016 T-cell surface glycoprotein CD1b OS=Homo sapiens GN=CD1B PE=1 SV=1 - [CD1B\_HUMAN]  
O15427 Monocarboxylate transporter 4 OS=Homo sapiens GN=SLC16A3 PE=1 SV=1 - [MOT4\_HUMAN]  
Q8NDH3 Probable aminopeptidase NPEPL1 OS=Homo sapiens GN=NPEPL1 PE=1 SV=3 - [PEPL1\_HUMAN]  
P50502 Hsc70-interacting protein OS=Homo sapiens GN=ST13 PE=1 SV=2 - [F10A1\_HUMAN]  
P22234 Multifunctional protein ADE2 OS=Homo sapiens GN=PAICS PE=1 SV=3 - [PUR6\_HUMAN]  
P11215 Integrin alpha-M OS=Homo sapiens GN=ITGAM PE=1 SV=2 - [ITAM\_HUMAN]  
P61221 ATP-binding cassette sub-family E member 1 OS=Homo sapiens GN=ABCE1 PE=1 SV=1 - [ABCE1\_HUMAN]  
P13797 Plastin-3 OS=Homo sapiens GN=PLS3 PE=1 SV=4 - [PLST\_HUMAN]  
P55058 Phospholipid transfer protein OS=Homo sapiens GN=PLTP PE=1 SV=1 - [PLTP\_HUMAN]  
Q5VW32 BRO1 domain-containing protein BROX OS=Homo sapiens GN=BROX PE=1 SV=1 - [BROX\_HUMAN]  
O60701 UDP-glucose 6-dehydrogenase OS=Homo sapiens GN=UGDH PE=1 SV=1 - [UGDH\_HUMAN]  
P13716 Delta-aminolevulinic acid dehydratase OS=Homo sapiens GN=ALAD PE=1 SV=1 - [HEM2\_HUMAN]  
P18827 Syndecan-1 OS=Homo sapiens GN=SDC1 PE=1 SV=3 - [SDC1\_HUMAN]  
Q96FW1 Ubiquitin thioesterase OTUB1 OS=Homo sapiens GN=OTUB1 PE=1 SV=2 - [OTUB1\_HUMAN]  
Q92598 Heat shock protein 105 kDa OS=Homo sapiens GN=HSPH1 PE=1 SV=1 - [HS105\_HUMAN]  
P52926 High mobility group protein HMGI-C OS=Homo sapiens GN=HMGA2 PE=1 SV=1 - [HMGA2\_HUMAN]  
Q99653 Calcium-binding protein p22 OS=Homo sapiens GN=CHP PE=1 SV=3 - [CHP1\_HUMAN]  
Q86VB7 Scavenger receptor cysteine-rich type 1 protein M130 OS=Homo sapiens GN=CD163 PE=1 SV=2  
P09651 Heterogeneous nuclear ribonucleoprotein A1 OS=Homo sapiens GN=HNRNPA1 PE=1 SV=5 - [ROA1\_HUMAN]  
P61106 Ras-related protein Rab-14 OS=Homo sapiens GN=RAB14 PE=1 SV=4 - [RAB14\_HUMAN]  
Q9Y2J2 Band 4.1-like protein 3 OS=Homo sapiens GN=EPB41L3 PE=1 SV=2 - [E41L3\_HUMAN]  
P49189 4-trimethylaminobutyraldehyde dehydrogenase OS=Homo sapiens GN=ALDH9A1 PE=1 SV=3  
P52565 Rho GDP-dissociation inhibitor 1 OS=Homo sapiens GN=ARHGDI1 PE=1 SV=3 - [GDIR1\_HUMAN]  
P43490 Nicotinamide phosphoribosyltransferase OS=Homo sapiens GN=NAMPT PE=1 SV=1 - [NAMPT\_HUMAN]  
Q13501 Sequestosome-1 OS=Homo sapiens GN=SQSTM1 PE=1 SV=1 - [SQSTM\_HUMAN]  
P04632 Calpain small subunit 1 OS=Homo sapiens GN=CAPNS1 PE=1 SV=1 - [CPNS1\_HUMAN]  
Q14108 Lysosome membrane protein 2 OS=Homo sapiens GN=SCARB2 PE=1 SV=2 - [SCR2\_HUMAN]  
P02747 Complement C1q subcomponent subunit C OS=Homo sapiens GN=C1QC PE=1 SV=3 - [C1QC\_HUMAN]  
Q9Y310 UPF0027 protein C22orf28 OS=Homo sapiens GN=C22orf28 PE=1 SV=1 - [CV028\_HUMAN]  
O00186 Syntaxin-binding protein 3 OS=Homo sapiens GN=STXB3 PE=1 SV=2 - [STXB3\_HUMAN]  
P29692 Elongation factor 1-delta OS=Homo sapiens GN=EEF1D PE=1 SV=5 - [EF1D\_HUMAN]  
P30566 Adenylosuccinate lyase OS=Homo sapiens GN=ADSL PE=1 SV=2 - [PUR8\_HUMAN]  
P32969 60S ribosomal protein L9 OS=Homo sapiens GN=RPL9 PE=1 SV=1 - [RL9\_HUMAN]

Q7Z5G4 Golgin subfamily A member 7 OS=Homo sapiens GN=GOLGA7 PE=1 SV=2 - [GOGA7\_HUMAN]  
 O14964 Hepatocyte growth factor-regulated tyrosine kinase substrate OS=Homo sapiens GN=HGS PE=1 SV=1  
 P84098 60S ribosomal protein L19 OS=Homo sapiens GN=RPL19 PE=1 SV=1 - [RL19\_HUMAN]  
 P08236 Beta-glucuronidase OS=Homo sapiens GN=GUSB PE=1 SV=2 - [BGLR\_HUMAN]  
 Q06210 Glucosamine--fructose-6-phosphate aminotransferase [isomerizing] 1 OS=Homo sapiens GN=GFPT1 PE=1  
 P30626 Sorcin OS=Homo sapiens GN=SRI PE=1 SV=1 - [SORCN\_HUMAN]  
 P60228 Eukaryotic translation initiation factor 3 subunit E OS=Homo sapiens GN=EIF3E PE=1 SV=1  
 O94985 Calsyntenin-1 OS=Homo sapiens GN=CLSTN1 PE=1 SV=1 - [CSTN1\_HUMAN]  
 P06703 Protein S100-A6 OS=Homo sapiens GN=S100A6 PE=1 SV=1 - [S10A6\_HUMAN]  
 Q01995 Transgelin OS=Homo sapiens GN=TAGLN PE=1 SV=4 - [TAGL\_HUMAN]  
 P21399 Cytoplasmic aconitate hydratase OS=Homo sapiens GN=ACO1 PE=1 SV=3 - [ACOC\_HUMAN]  
 P15104 Glutamine synthetase OS=Homo sapiens GN=GLUL PE=1 SV=4 - [GLNA\_HUMAN]  
 P50552 Vasodilator-stimulated phosphoprotein OS=Homo sapiens GN=VASP PE=1 SV=3 - [VASP\_HUMAN]  
 O00469 Procollagen-lysine,2-oxoglutarate 5-dioxygenase 2 OS=Homo sapiens GN=PLOD2 PE=1 SV=2  
 Q9UMD9 Collagen alpha-1(XVII) chain OS=Homo sapiens GN=COL17A1 PE=1 SV=3 - [COHA1\_HUMAN]  
 P30050 60S ribosomal protein L12 OS=Homo sapiens GN=RPL12 PE=1 SV=1 - [RL12\_HUMAN]  
 P54289 Voltage-dependent calcium channel subunit alpha-2/delta-1 OS=Homo sapiens GN=CACNA2D1 PE=1 SV=3  
 O43143 Putative pre-mRNA-splicing factor ATP-dependent RNA helicase DHX15 OS=Homo sapiens GN=DHX15 PE=1  
 P78417 Glutathione S-transferase omega-1 OS=Homo sapiens GN=GSTO1 PE=1 SV=2 - [GSTO1\_HUMAN]  
 Q96KP4 Cytosolic non-specific dipeptidase OS=Homo sapiens GN=CNDP2 PE=1 SV=2 - [CNDP2\_HUMAN]  
 Q9UBQ5 Eukaryotic translation initiation factor 3 subunit K OS=Homo sapiens GN=EIF3K PE=1 SV=1 - [EIF3K\_HUMAN]  
 O00410 Importin-5 OS=Homo sapiens GN=IPO5 PE=1 SV=4 - [IPO5\_HUMAN]  
 O00148 ATP-dependent RNA helicase DDX39 OS=Homo sapiens GN=DDX39 PE=1 SV=2 - [DDX39\_HUMAN]  
 P61978 Heterogeneous nuclear ribonucleoprotein K OS=Homo sapiens GN=HNRNPK PE=1 SV=1 - [HNRPK\_HUMAN]  
 P49591 Seryl-tRNA synthetase, cytoplasmic OS=Homo sapiens GN=SARS PE=1 SV=3 - [SYSC\_HUMAN]  
 P62906 60S ribosomal protein L10a OS=Homo sapiens GN=RPL10A PE=1 SV=2 - [RL10A\_HUMAN]  
 P00390 Glutathione reductase, mitochondrial OS=Homo sapiens GN=GSR PE=1 SV=2 - [GSHR\_HUMAN]  
 P39019 40S ribosomal protein S19 OS=Homo sapiens GN=RPS19 PE=1 SV=2 - [RS19\_HUMAN]  
 P05121 Plasminogen activator inhibitor 1 OS=Homo sapiens GN=SERPINE1 PE=1 SV=1 - [PAI1\_HUMAN]  
 A6NEC2 Puromycin-sensitive aminopeptidase-like protein OS=Homo sapiens GN=NPEPPSL1 PE=2 SV=3  
 P53990 IST1 homolog OS=Homo sapiens GN=KIAA0174 PE=1 SV=1 - [IST1\_HUMAN]  
 P13686 Tartrate-resistant acid phosphatase type 5 OS=Homo sapiens GN=ACP5 PE=1 SV=3 - [PPA5\_HUMAN]  
 P05090 Apolipoprotein D OS=Homo sapiens GN=APOD PE=1 SV=1 - [APOD\_HUMAN]  
 P17174 Aspartate aminotransferase, cytoplasmic OS=Homo sapiens GN=GOT1 PE=1 SV=3 - [AATC\_HUMAN]  
 Q9UKS6 Protein kinase C and casein kinase substrate in neurons protein 3 OS=Homo sapiens GN=PACSIN3 PE=1  
 P62081 40S ribosomal protein S7 OS=Homo sapiens GN=RPS7 PE=1 SV=1 - [RS7\_HUMAN]  
 Q7Z7G0 Target of Nesh-SH3 OS=Homo sapiens GN=ABI3BP PE=1 SV=1 - [TARSH\_HUMAN]  
 P05109 Protein S100-A8 OS=Homo sapiens GN=S100A8 PE=1 SV=1 - [S10A8\_HUMAN]  
 P35237 Serpin B6 OS=Homo sapiens GN=SERPINB6 PE=1 SV=3 - [SPB6\_HUMAN]  
 P05106 Integrin beta-3 OS=Homo sapiens GN=ITGB3 PE=1 SV=2 - [ITB3\_HUMAN]  
 P62714 Serine/threonine-protein phosphatase 2A catalytic subunit beta isoform OS=Homo sapiens GN=PPP2CB PE=1  
 P33241 Lymphocyte-specific protein 1 OS=Homo sapiens GN=LSP1 PE=1 SV=1 - [LSP1\_HUMAN]  
 O15372 Eukaryotic translation initiation factor 3 subunit H OS=Homo sapiens GN=EIF3H PE=1 SV=1  
 P09543 2',3'-cyclic-nucleotide 3'-phosphodiesterase OS=Homo sapiens GN=CNP PE=1 SV=2 - [CN37\_HUMAN]  
 P48509 CD151 antigen OS=Homo sapiens GN=CD151 PE=1 SV=3 - [CD151\_HUMAN]  
 P54578 Ubiquitin carboxyl-terminal hydrolase 14 OS=Homo sapiens GN=USP14 PE=1 SV=3 - [UBP14\_HUMAN]  
 P62277 40S ribosomal protein S13 OS=Homo sapiens GN=RPS13 PE=1 SV=2 - [RS13\_HUMAN]  
 O14908 PDZ domain-containing protein GIPC1 OS=Homo sapiens GN=GIPC1 PE=1 SV=2 - [GIPC1\_HUMAN]  
 P30533 Alpha-2-macroglobulin receptor-associated protein OS=Homo sapiens GN=LRPAP1 PE=1 SV=1  
 P36269 Gamma-glutamyltransferase 5 OS=Homo sapiens GN=GGT5 PE=1 SV=2 - [GGT5\_HUMAN]  
 O14788 Tumor necrosis factor ligand superfamily member 11 OS=Homo sapiens GN=TNFSF11 PE=1 SV=1  
 O14744 Protein arginine N-methyltransferase 5 OS=Homo sapiens GN=PRMT5 PE=1 SV=4 - [ANM5\_HUMAN]  
 Q12905 Interleukin enhancer-binding factor 2 OS=Homo sapiens GN=ILF2 PE=1 SV=2 - [ILF2\_HUMAN]  
 O60884 DnaJ homolog subfamily A member 2 OS=Homo sapiens GN=DNAJA2 PE=1 SV=1 - [DNJA2\_HUMAN]  
 P25774 Cathepsin S OS=Homo sapiens GN=CTSS PE=1 SV=3 - [CATS\_HUMAN]  
 Q13561 Dynactin subunit 2 OS=Homo sapiens GN=DCTN2 PE=1 SV=4 - [DCTN2\_HUMAN]  
 O60547 GDP-mannose 4,6 dehydratase OS=Homo sapiens GN=GMDS PE=1 SV=1 - [GMDS\_HUMAN]  
 Q15019 Septin-2 OS=Homo sapiens GN=SEPT2 PE=1 SV=1 - [SEPT2\_HUMAN]

Q96FQ6 Protein S100-A16 OS=Homo sapiens GN=S100A16 PE=1 SV=1 - [S10AG\_HUMAN]  
Q9Y624 Junctional adhesion molecule A OS=Homo sapiens GN=F11R PE=1 SV=1 - [JAM1\_HUMAN]  
P48637 Glutathione synthetase OS=Homo sapiens GN=GSS PE=1 SV=1 - [GSHB\_HUMAN]  
Q9UJ70 N-acetyl-D-glucosamine kinase OS=Homo sapiens GN=NAGK PE=1 SV=4 - [NAGK\_HUMAN]  
Q5T200 Zinc finger CCCH domain-containing protein 13 OS=Homo sapiens GN=ZC3H13 PE=1 SV=1  
P14324 Farnesyl pyrophosphate synthase OS=Homo sapiens GN=FDPS PE=1 SV=4 - [FPPS\_HUMAN]  
Q08357 Sodium-dependent phosphate transporter 2 OS=Homo sapiens GN=SLC20A2 PE=1 SV=1 - [S20A2\_HUMAN]  
P61353 60S ribosomal protein L27 OS=Homo sapiens GN=RPL27 PE=1 SV=2 - [RL27\_HUMAN]  
Q8IV08 Phospholipase D3 OS=Homo sapiens GN=PLD3 PE=1 SV=1 - [PLD3\_HUMAN]  
Q10588 ADP-ribosyl cyclase 2 OS=Homo sapiens GN=BST1 PE=1 SV=2 - [BST1\_HUMAN]  
P21266 Glutathione S-transferase Mu 3 OS=Homo sapiens GN=GSTM3 PE=1 SV=3 - [GSTM3\_HUMAN]  
Q99829 Copine-1 OS=Homo sapiens GN=CPNE1 PE=1 SV=1 - [CPNE1\_HUMAN]  
P04179 Superoxide dismutase [Mn], mitochondrial OS=Homo sapiens GN=SOD2 PE=1 SV=2 - [SODM\_HUMAN]  
P23921 Ribonucleoside-diphosphate reductase large subunit OS=Homo sapiens GN=RRM1 PE=1 SV=1  
Q86UX7 Fermitin family homolog 3 OS=Homo sapiens GN=FERMT3 PE=1 SV=1 - [URP2\_HUMAN]  
Q02790 Peptidyl-prolyl cis-trans isomerase FKBP4 OS=Homo sapiens GN=FKBP4 PE=1 SV=3 - [FKBP4\_HUMAN]  
Q99497 Protein DJ-1 OS=Homo sapiens GN=PARK7 PE=1 SV=2 - [PARK7\_HUMAN]  
P48163 NADP-dependent malic enzyme OS=Homo sapiens GN=ME1 PE=1 SV=1 - [MAOX\_HUMAN]  
Q99828 Calcium and integrin-binding protein 1 OS=Homo sapiens GN=CIB1 PE=1 SV=4 - [CIB1\_HUMAN]  
Q13630 GDP-L-fucose synthase OS=Homo sapiens GN=TSTA3 PE=1 SV=1 - [FCL\_HUMAN]  
P53985 Monocarboxylate transporter 1 OS=Homo sapiens GN=SLC16A1 PE=1 SV=3 - [MOT1\_HUMAN]  
Q9NY33 Dipeptidyl peptidase 3 OS=Homo sapiens GN=DPP3 PE=1 SV=2 - [DPP3\_HUMAN]  
O75891 10-formyltetrahydrofolate dehydrogenase OS=Homo sapiens GN=ALDH1L1 PE=1 SV=2 - [FTHFD\_HUMAN]  
P07948 Tyrosine-protein kinase Lyn OS=Homo sapiens GN=LYN PE=1 SV=3 - [LYN\_HUMAN]  
Q96QR8 Transcriptional activator protein Pur-beta OS=Homo sapiens GN=PURB PE=1 SV=3 - [PURB\_HUMAN]  
Q9UQN3 Charged multivesicular body protein 2b OS=Homo sapiens GN=CHMP2B PE=1 SV=1 - [CHM2B\_HUMAN]  
O14980 Exportin-1 OS=Homo sapiens GN=XPO1 PE=1 SV=1 - [XPO1\_HUMAN]  
P00736 Complement C1r subcomponent OS=Homo sapiens GN=C1R PE=1 SV=2 - [C1R\_HUMAN]  
P12525 Protein L-Myc-2 OS=Homo sapiens GN=MYCL2 PE=2 SV=1 - [MYCL2\_HUMAN]  
P28907 ADP-ribosyl cyclase 1 OS=Homo sapiens GN=CD38 PE=1 SV=2 - [CD38\_HUMAN]  
Q13418 Integrin-linked protein kinase OS=Homo sapiens GN=ILK PE=1 SV=2 - [ILK\_HUMAN]  
Q15365 Poly(rC)-binding protein 1 OS=Homo sapiens GN=PCBP1 PE=1 SV=2 - [PCBP1\_HUMAN]  
P36222 Chitinase-3-like protein 1 OS=Homo sapiens GN=CHI3L1 PE=1 SV=2 - [CH3L1\_HUMAN]  
Q02809 Procollagen-lysine,2-oxoglutarate 5-dioxygenase 1 OS=Homo sapiens GN=PLOD1 PE=1 SV=2  
Q02878 60S ribosomal protein L6 OS=Homo sapiens GN=RPL6 PE=1 SV=3 - [RL6\_HUMAN]  
Q8N6Y2 Leucine-rich repeat-containing protein 17 OS=Homo sapiens GN=LRR17 PE=2 SV=1 - [LRC17\_HUMAN]  
Q9Y6G9 Cytoplasmic dynein 1 light intermediate chain 1 OS=Homo sapiens GN=DYNC1L1 PE=1 SV=3  
P48556 26S proteasome non-ATPase regulatory subunit 8 OS=Homo sapiens GN=PSMD8 PE=1 SV=2  
Q9Y285 Phenylalanyl-tRNA synthetase alpha chain OS=Homo sapiens GN=FARSA PE=1 SV=3 - [SYFA\_HUMAN]  
P05120 Plasminogen activator inhibitor 2 OS=Homo sapiens GN=SERPIN2 PE=1 SV=2 - [PAI2\_HUMAN]  
Q9NTK5 Obg-like ATPase 1 OS=Homo sapiens GN=OLA1 PE=1 SV=2 - [OLA1\_HUMAN]  
P46778 60S ribosomal protein L21 OS=Homo sapiens GN=RPL21 PE=1 SV=2 - [RL21\_HUMAN]  
Q9H4A4 Aminopeptidase B OS=Homo sapiens GN=RNPEP PE=1 SV=2 - [AMPB\_HUMAN]  
P07741 Adenine phosphoribosyltransferase OS=Homo sapiens GN=APRT PE=1 SV=2 - [APT\_HUMAN]  
P09622 Dihydroliipoyl dehydrogenase, mitochondrial OS=Homo sapiens GN=DLD PE=1 SV=2 - [DLDH\_HUMAN]  
Q13813 Spectrin alpha chain, brain OS=Homo sapiens GN=SPTAN1 PE=1 SV=3 - [SPTA2\_HUMAN]  
O95373 Importin-7 OS=Homo sapiens GN=IPO7 PE=1 SV=1 - [IPO7\_HUMAN]  
Q9NQC3 Reticulon-4 OS=Homo sapiens GN=RTN4 PE=1 SV=2 - [RTN4\_HUMAN]  
P05089 Arginase-1 OS=Homo sapiens GN=ARG1 PE=1 SV=2 - [ARG1\_HUMAN]  
Q96PY5 Formin-like protein 2 OS=Homo sapiens GN=FMNL2 PE=1 SV=3 - [FMNL2\_HUMAN]  
P19256 Lymphocyte function-associated antigen 3 OS=Homo sapiens GN=CD58 PE=1 SV=1 - [LFA3\_HUMAN]  
Q02543 60S ribosomal protein L18a OS=Homo sapiens GN=RPL18A PE=1 SV=2 - [RL18A\_HUMAN]  
Q6UX06 Olfactomedin-4 OS=Homo sapiens GN=OLFM4 PE=1 SV=1 - [OLFM4\_HUMAN]  
P02748 Complement component C9 OS=Homo sapiens GN=C9 PE=1 SV=2 - [CO9\_HUMAN]  
P36543 V-type proton ATPase subunit E 1 OS=Homo sapiens GN=ATP6V1E1 PE=1 SV=1 - [VATE1\_HUMAN]  
P49589 Cysteinyln-tRNA synthetase, cytoplasmic OS=Homo sapiens GN=CARS PE=1 SV=3 - [SYCC\_HUMAN]  
Q9NTG1 Polycystic kidney disease and receptor for egg jelly-related protein OS=Homo sapiens GN=PKDREJ PE=2  
P07099 Epoxide hydrolase 1 OS=Homo sapiens GN=EPHX1 PE=1 SV=1 - [HYEP\_HUMAN]

Q12846 Syntaxin-4 OS=Homo sapiens GN=STX4 PE=1 SV=2 - [STX4\_HUMAN]  
 Q04446 1,4-alpha-glucan-branching enzyme OS=Homo sapiens GN=GBE1 PE=1 SV=3 - [GLGB\_HUMAN]  
 P22897 Macrophage mannose receptor 1 OS=Homo sapiens GN=MRC1 PE=1 SV=1 - [MRC1\_HUMAN]  
 P33993 DNA replication licensing factor MCM7 OS=Homo sapiens GN=MCM7 PE=1 SV=4 - [MCM7\_HUMAN]  
 P00450 Ceruloplasmin OS=Homo sapiens GN=CP PE=1 SV=1 - [CERU\_HUMAN]  
 Q9UN52 COP9 signalosome complex subunit 3 OS=Homo sapiens GN=COPS3 PE=1 SV=3 - [CSN3\_HUMAN]  
 P55010 Eukaryotic translation initiation factor 5 OS=Homo sapiens GN=EIF5 PE=1 SV=2 - [IF5\_HUMAN]  
 P05155 Plasma protease C1 inhibitor OS=Homo sapiens GN=SERPING1 PE=1 SV=2 - [IC1\_HUMAN]  
 Q8IWA5 Choline transporter-like protein 2 OS=Homo sapiens GN=SLC44A2 PE=1 SV=3 - [CTL2\_HUMAN]  
 P17812 CTP synthase 1 OS=Homo sapiens GN=CTPS PE=1 SV=2 - [PYRG1\_HUMAN]  
 P26196 Probable ATP-dependent RNA helicase DDX6 OS=Homo sapiens GN=DDX6 PE=1 SV=2 - [DDX6\_HUMAN]  
 P62280 40S ribosomal protein S11 OS=Homo sapiens GN=RPS11 PE=1 SV=3 - [RS11\_HUMAN]  
 P55209 Nucleosome assembly protein 1-like 1 OS=Homo sapiens GN=NAP1L1 PE=1 SV=1 - [NP1L1\_HUMAN]  
 Q8WUX1 Sodium-coupled neutral amino acid transporter 5 OS=Homo sapiens GN=SLC38A5 PE=1 SV=1  
 Q9NR45 Sialic acid synthase OS=Homo sapiens GN=NANS PE=1 SV=2 - [SIAS\_HUMAN]  
 P14384 Carboxypeptidase M OS=Homo sapiens GN=CPM PE=1 SV=2 - [CBPM\_HUMAN]  
 Q14699 Raftlin OS=Homo sapiens GN=RFTN1 PE=1 SV=4 - [RFTN1\_HUMAN]  
 Q9UBI6 Guanine nucleotide-binding protein G(I)/G(S)/G(O) subunit gamma-12 OS=Homo sapiens GN=GNG12 PE=1  
 P17655 Calpain-2 catalytic subunit OS=Homo sapiens GN=CAPN2 PE=1 SV=6 - [CAN2\_HUMAN]  
 Q16543 Hsp90 co-chaperone Cdc37 OS=Homo sapiens GN=CDC37 PE=1 SV=1 - [CDC37\_HUMAN]  
 Q9UNN8 Endothelial protein C receptor OS=Homo sapiens GN=PROCR PE=1 SV=1 - [EPCR\_HUMAN]  
 P02647 Apolipoprotein A-I OS=Homo sapiens GN=APOA1 PE=1 SV=1 - [APOA1\_HUMAN]  
 P32926 Desmoglein-3 OS=Homo sapiens GN=DSG3 PE=1 SV=2 - [DSG3\_HUMAN]  
 O75436 Vacuolar protein sorting-associated protein 26A OS=Homo sapiens GN=VPS26A PE=1 SV=2 - [VP26A\_HUMAN]  
 O60716 Catenin delta-1 OS=Homo sapiens GN=CTNND1 PE=1 SV=1 - [CTND1\_HUMAN]  
 P50748 Kinetochore-associated protein 1 OS=Homo sapiens GN=KNTC1 PE=1 SV=1 - [KNTC1\_HUMAN]  
 Q9Y566 SH3 and multiple ankyrin repeat domains protein 1 OS=Homo sapiens GN=SHANK1 PE=1 SV=2  
 P49915 GMP synthase [glutamine-hydrolyzing] OS=Homo sapiens GN=GMPS PE=1 SV=1 - [GUAA\_HUMAN]  
 P22102 Trifunctional purine biosynthetic protein adenosine-3 OS=Homo sapiens GN=GART PE=1 SV=1  
 Q9HC84 Mucin-5B OS=Homo sapiens GN=MUC5B PE=1 SV=3 - [MUC5B\_HUMAN]  
 Q15070 Mitochondrial inner membrane protein OXA1L OS=Homo sapiens GN=OXA1L PE=1 SV=3 - [OXA1L\_HUMAN]  
 P31948 Stress-induced-phosphoprotein 1 OS=Homo sapiens GN=STIP1 PE=1 SV=1 - [STIP1\_HUMAN]  
 Q14146 Unhealthy ribosome biogenesis protein 2 homolog OS=Homo sapiens GN=URB2 PE=1 SV=2  
 Q8NF91 Nesprin-1 OS=Homo sapiens GN=SYNE1 PE=1 SV=3 - [SYNE1\_HUMAN]  
 Q9UK96 F-box only protein 10 OS=Homo sapiens GN=FBXO10 PE=2 SV=3 - [FBX10\_HUMAN]  
 P20930 Filaggrin OS=Homo sapiens GN=FLG PE=1 SV=3 - [FILA\_HUMAN]  
 A8MXY4 Zinc finger protein 99 OS=Homo sapiens GN=ZNF99 PE=2 SV=2 - [ZNF99\_HUMAN]  
 P49257 Protein ERGIC-53 OS=Homo sapiens GN=LMAN1 PE=1 SV=2 - [LMAN1\_HUMAN]  
 Q709C8 Vacuolar protein sorting-associated protein 13C OS=Homo sapiens GN=VPS13C PE=1 SV=1  
 Q12986 Transcriptional repressor NF-X1 OS=Homo sapiens GN=NFX1 PE=1 SV=2 - [NFX1\_HUMAN]
