# Supplementary material for: Human thymic epithelial primary cells produce exosomes carrying tissue-restricted antigens
Source: PubMed Central journal article supplement — Immunol Cell Biol. 2015 Mar 17;93(8):727–34. doi: 10.1038/icb.2015.33 (PMC4575951; doi:10.1038/icb.2015.33), 2015-03-17
Supplement: icb201533x4.pdf [file icb201533x4.pdf]

**Table S3.** Identified proteins in exosomes (culture 2)

| Acc. Nr.(Swissprot) | Description                                                                                      |
|---------------------|--------------------------------------------------------------------------------------------------|
| P62805              | Histone H4 OS=Homo sapiens GN=HIST1H4A PE=1 SV=2 - [H4_HUMAN]                                    |
| P60709              | Actin, cytoplasmic 1 OS=Homo sapiens GN=ACTB PE=1 SV=1 - [ACTB_HUMAN]                            |
| P58876              | Histone H2B type 1-D OS=Homo sapiens GN=HIST1H2BD PE=1 SV=2 - [H2B1D_HUMAN]                      |
| P23527              | Histone H2B type 1-O OS=Homo sapiens GN=HIST1H2BO PE=1 SV=3 - [H2B1O_HUMAN]                      |
| Q96KK5              | Histone H2A type 1-H OS=Homo sapiens GN=HIST1H2AH PE=1 SV=3 - [H2A1H_HUMAN]                      |
| P04264              | Keratin, type II cytoskeletal 1 OS=Homo sapiens GN=KRT1 PE=1 SV=6 - [K2C1_HUMAN]                 |
| P68431              | Histone H3.1 OS=Homo sapiens GN=HIST1H3A PE=1 SV=2 - [H31_HUMAN]                                 |
| P55060              | Exportin-2 OS=Homo sapiens GN=CSE1L PE=1 SV=3 - [XPO2_HUMAN]                                     |
| Q9Y2Z9              | Ubiquinone biosynthesis monooxygenase COQ6 OS=Homo sapiens GN=COQ6 PE=1 SV=2 - [COQ6_HUMAN]      |
| P49327              | Fatty acid synthase OS=Homo sapiens GN=FASN PE=1 SV=3 - [FAS_HUMAN]                              |
| P02751              | Fibronectin OS=Homo sapiens GN=FN1 PE=1 SV=4 - [FNC_HUMAN]                                       |
| P13646              | Keratin, type I cytoskeletal 13 OS=Homo sapiens GN=KRT13 PE=1 SV=4 - [K1C13_HUMAN]               |
| P13645              | Keratin, type I cytoskeletal 10 OS=Homo sapiens GN=KRT10 PE=1 SV=6 - [K1C10_HUMAN]               |
| P35908              | Keratin, type II cytoskeletal 2 epidermal OS=Homo sapiens GN=KRT2 PE=1 SV=2 - [K22E_HUMAN]       |
| P19013              | Keratin, type II cytoskeletal 4 OS=Homo sapiens GN=KRT4 PE=1 SV=4 - [K2C4_HUMAN]                 |
| Q14204              | Cytoplasmic dynein 1 heavy chain 1 OS=Homo sapiens GN=DYNC1H1 PE=1 SV=5 - [DYHC1_HUMAN]          |
| P35527              | Keratin, type I cytoskeletal 9 OS=Homo sapiens GN=KRT9 PE=1 SV=3 - [K1C9_HUMAN]                  |
| P14618              | Pyruvate kinase isozymes M1/M2 OS=Homo sapiens GN=PKM2 PE=1 SV=4 - [KPYM_HUMAN]                  |
| Q8WUM4              | Programmed cell death 6-interacting protein OS=Homo sapiens GN=PDCD6IP PE=1 SV=1 - [PDC6I_HUMAN] |
| P13647              | Keratin, type II cytoskeletal 5 OS=Homo sapiens GN=KRT5 PE=1 SV=3 - [K2C5_HUMAN]                 |
| P02533              | Keratin, type I cytoskeletal 14 OS=Homo sapiens GN=KRT14 PE=1 SV=4 - [K1C14_HUMAN]               |
| P07437              | Tubulin beta chain OS=Homo sapiens GN=TUBB PE=1 SV=2 - [TBB5_HUMAN]                              |
| P68371              | Tubulin beta-2C chain OS=Homo sapiens GN=TUBB2C PE=1 SV=1 - [TBB2C_HUMAN]                        |
| P55072              | Transitional endoplasmic reticulum ATPase OS=Homo sapiens GN=VCP PE=1 SV=4 - [TERA_HUMAN]        |
| P04259              | Keratin, type II cytoskeletal 6B OS=Homo sapiens GN=KRT6B PE=1 SV=5 - [K2C6B_HUMAN]              |
| P68104              | Elongation factor 1-alpha 1 OS=Homo sapiens GN=EEF1A1 PE=1 SV=1 - [EF1A1_HUMAN]                  |
| P08779              | Keratin, type I cytoskeletal 16 OS=Homo sapiens GN=KRT16 PE=1 SV=4 - [K1C16_HUMAN]               |
| P02538              | Keratin, type II cytoskeletal 6A OS=Homo sapiens GN=KRT6A PE=1 SV=3 - [K2C6A_HUMAN]              |
| Q16787              | Laminin subunit alpha-3 OS=Homo sapiens GN=LAMA3 PE=1 SV=2 - [LAMA3_HUMAN]                       |
| P21333              | Filamin-A OS=Homo sapiens GN=FLNA PE=1 SV=4 - [FLNA_HUMAN]                                       |
| Q08380              | Galectin-3-binding protein OS=Homo sapiens GN=LGALS3BP PE=1 SV=1 - [LG3BP_HUMAN]                 |
| Q13753              | Laminin subunit gamma-2 OS=Homo sapiens GN=LAMC2 PE=1 SV=2 - [LAMC2_HUMAN]                       |
| Q13509              | Tubulin beta-3 chain OS=Homo sapiens GN=TUBB3 PE=1 SV=2 - [TBB3_HUMAN]                           |
| P04406              | Glyceraldehyde-3-phosphate dehydrogenase OS=Homo sapiens GN=GAPDH PE=1 SV=3 - [G3P_HUMAN]        |
| Q9BQE3              | Tubulin alpha-1C chain OS=Homo sapiens GN=TUBA1C PE=1 SV=1 - [TBA1C_HUMAN]                       |
| P07996              | Thrombospondin-1 OS=Homo sapiens GN=THBS1 PE=1 SV=2 - [TSP1_HUMAN]                               |
| Q04695              | Keratin, type I cytoskeletal 17 OS=Homo sapiens GN=KRT17 PE=1 SV=2 - [K1C17_HUMAN]               |
| P27708              | CAD protein OS=Homo sapiens GN=CAD PE=1 SV=3 - [PYR1_HUMAN]                                      |
| O75369              | Filamin-B OS=Homo sapiens GN=FLNB PE=1 SV=2 - [FLNB_HUMAN]                                       |
| Q13751              | Laminin subunit beta-3 OS=Homo sapiens GN=LAMB3 PE=1 SV=1 - [LAMB3_HUMAN]                        |
| P12111              | Collagen alpha-3(VI) chain OS=Homo sapiens GN=COL6A3 PE=1 SV=5 - [CO6A3_HUMAN]                   |
| P0CG48              | Polyubiquitin-C OS=Homo sapiens GN=UBC PE=1 SV=3 - [UBC_HUMAN]                                   |
| P08238              | Heat shock protein HSP 90-beta OS=Homo sapiens GN=HSP90AB1 PE=1 SV=4 - [HS90B_HUMAN]             |
| P07355              | Annexin A2 OS=Homo sapiens GN=ANXA2 PE=1 SV=2 - [ANXA2_HUMAN]                                    |
| Q13813              | Spectrin alpha chain, brain OS=Homo sapiens GN=SPTAN1 PE=1 SV=3 - [SPTA2_HUMAN]                  |
| P50990              | T-complex protein 1 subunit theta OS=Homo sapiens GN=CCT8 PE=1 SV=4 - [TCPQ_HUMAN]               |
| P35579              | Myosin-9 OS=Homo sapiens GN=MYH9 PE=1 SV=4 - [MYH9_HUMAN]                                        |
| P11142              | Heat shock cognate 71 kDa protein OS=Homo sapiens GN=HSPA8 PE=1 SV=1 - [HSP7C_HUMAN]             |
| P13639              | Elongation factor 2 OS=Homo sapiens GN=EEF2 PE=1 SV=4 - [EF2_HUMAN]                              |
| P05556              | Integrin beta-1 OS=Homo sapiens GN=ITGB1 PE=1 SV=2 - [ITB1_HUMAN]                                |
| Q9P2B2              | Prostaglandin F2 receptor negative regulator OS=Homo sapiens GN=PTGFRN PE=1 SV=2 - [FPRP_HUMAN]  |
| Q9BUI5              | Tubulin beta-6 chain OS=Homo sapiens GN=TUBB6 PE=1 SV=1 - [TBB6_HUMAN]                           |
| P53396              | ATP-citrate synthase OS=Homo sapiens GN=ACLY PE=1 SV=3 - [ACLY_HUMAN]                            |
| P28074              | Proteasome subunit beta type-5 OS=Homo sapiens GN=PSMB5 PE=1 SV=3 - [PSB5_HUMAN]                 |
| Q14764              | Major vault protein OS=Homo sapiens GN=MVP PE=1 SV=4 - [MVP_HUMAN]                               |

Q01082 Spectrin beta chain, brain 1 OS=Homo sapiens GN=SPTBN1 PE=1 SV=2 - [SPTB2\_HUMAN]  
 P07942 Laminin subunit beta-1 OS=Homo sapiens GN=LAMB1 PE=1 SV=2 - [LAMB1\_HUMAN]  
 P08727 Keratin, type I cytoskeletal 19 OS=Homo sapiens GN=KRT19 PE=1 SV=4 - [K1C19\_HUMAN]  
 P25786 Proteasome subunit alpha type-1 OS=Homo sapiens GN=PSMA1 PE=1 SV=1 - [PSA1\_HUMAN]  
 P16144 Integrin beta-4 OS=Homo sapiens GN=ITGB4 PE=1 SV=5 - [ITB4\_HUMAN]  
 P07900 Heat shock protein HSP 90-alpha OS=Homo sapiens GN=HSP90AA1 PE=1 SV=5 - [HS90A\_HUMAN]  
 P60842 Eukaryotic initiation factor 4A-I OS=Homo sapiens GN=EIF4A1 PE=1 SV=1 - [IF4A1\_HUMAN]  
 Q13200 26S proteasome non-ATPase regulatory subunit 2 OS=Homo sapiens GN=PSMD2 PE=1 SV=3 - [PSMD2\_HUMAN]  
 P00338 L-lactate dehydrogenase A chain OS=Homo sapiens GN=LDHA PE=1 SV=2 - [LDHA\_HUMAN]  
 O43242 26S proteasome non-ATPase regulatory subunit 3 OS=Homo sapiens GN=PSMD3 PE=1 SV=2 - [PSMD3\_HUMAN]  
 Q00610 Clathrin heavy chain 1 OS=Homo sapiens GN=CLTC PE=1 SV=5 - [CLH1\_HUMAN]  
 P25788 Proteasome subunit alpha type-3 OS=Homo sapiens GN=PSMA3 PE=1 SV=2 - [PSA3\_HUMAN]  
 P23396 40S ribosomal protein S3 OS=Homo sapiens GN=RPS3 PE=1 SV=2 - [RS3\_HUMAN]  
 P49368 T-complex protein 1 subunit gamma OS=Homo sapiens GN=CCT3 PE=1 SV=4 - [TCPG\_HUMAN]  
 P04075 Fructose-bisphosphate aldolase A OS=Homo sapiens GN=ALDOA PE=1 SV=2 - [ALDOA\_HUMAN]  
 Q16851 UTP--glucose-1-phosphate uridylyltransferase OS=Homo sapiens GN=UGP2 PE=1 SV=5 - [UGPA\_HUMAN]  
 P27105 Erythrocyte band 7 integral membrane protein OS=Homo sapiens GN=STOM PE=1 SV=3 - [STOM\_HUMAN]  
 P68366 Tubulin alpha-4A chain OS=Homo sapiens GN=TUBA4A PE=1 SV=1 - [TBA4A\_HUMAN]  
 P28072 Proteasome subunit beta type-6 OS=Homo sapiens GN=PSMB6 PE=1 SV=4 - [PSB6\_HUMAN]  
 P53621 Coatomer subunit alpha OS=Homo sapiens GN=COPA PE=1 SV=2 - [COPA\_HUMAN]  
 O00468 Agrin OS=Homo sapiens GN=AGRN PE=1 SV=4 - [AGRIN\_HUMAN]  
 Q5T4S7 E3 ubiquitin-protein ligase UBR4 OS=Homo sapiens GN=UBR4 PE=1 SV=1 - [UBR4\_HUMAN]  
 P62191 26S protease regulatory subunit 4 OS=Homo sapiens GN=PSMC1 PE=1 SV=1 - [PRS4\_HUMAN]  
 Q15149 Plectin OS=Homo sapiens GN=PLEC PE=1 SV=3 - [PLEC\_HUMAN]  
 P35998 26S protease regulatory subunit 7 OS=Homo sapiens GN=PSMC2 PE=1 SV=3 - [PRS7\_HUMAN]  
 P17987 T-complex protein 1 subunit alpha OS=Homo sapiens GN=TCP1 PE=1 SV=1 - [TCPA\_HUMAN]  
 P11047 Laminin subunit gamma-1 OS=Homo sapiens GN=LAMC1 PE=1 SV=3 - [LAMC1\_HUMAN]  
 P78371 T-complex protein 1 subunit beta OS=Homo sapiens GN=CCT2 PE=1 SV=4 - [TCPB\_HUMAN]  
 Q9Y230 RuvB-like 2 OS=Homo sapiens GN=RUVBL2 PE=1 SV=3 - [RUVB2\_HUMAN]  
 O14818 Proteasome subunit alpha type-7 OS=Homo sapiens GN=PSMA7 PE=1 SV=1 - [PSA7\_HUMAN]  
 P60900 Proteasome subunit alpha type-6 OS=Homo sapiens GN=PSMA6 PE=1 SV=1 - [PSA6\_HUMAN]  
 P62195 26S protease regulatory subunit 8 OS=Homo sapiens GN=PSMC5 PE=1 SV=1 - [PRS8\_HUMAN]  
 P23229 Integrin alpha-6 OS=Homo sapiens GN=ITGA6 PE=1 SV=4 - [ITA6\_HUMAN]  
 O43707 Alpha-actinin-4 OS=Homo sapiens GN=ACTN4 PE=1 SV=2 - [ACTN4\_HUMAN]  
 P12814 Alpha-actinin-1 OS=Homo sapiens GN=ACTN1 PE=1 SV=2 - [ACTN1\_HUMAN]  
 P17301 Integrin alpha-2 OS=Homo sapiens GN=ITGA2 PE=1 SV=1 - [ITA2\_HUMAN]  
 P52895 Aldo-keto reductase family 1 member C2 OS=Homo sapiens GN=AKR1C2 PE=1 SV=3 - [AK1C2\_HUMAN]  
 O00232 26S proteasome non-ATPase regulatory subunit 12 OS=Homo sapiens GN=PSMD12 PE=1 SV=3 - [PSD12\_HUMAN]  
 P15924 Desmoplakin OS=Homo sapiens GN=DSP PE=1 SV=3 - [DESP\_HUMAN]  
 P08195 4F2 cell-surface antigen heavy chain OS=Homo sapiens GN=SLC3A2 PE=1 SV=3 - [4F2\_HUMAN]  
 P40227 T-complex protein 1 subunit zeta OS=Homo sapiens GN=CCT6A PE=1 SV=3 - [TCPZ\_HUMAN]  
 P25789 Proteasome subunit alpha type-4 OS=Homo sapiens GN=PSMA4 PE=1 SV=1 - [PSA4\_HUMAN]  
 P42330 Aldo-keto reductase family 1 member C3 OS=Homo sapiens GN=AKR1C3 PE=1 SV=4 - [AK1C3\_HUMAN]  
 Q99460 26S proteasome non-ATPase regulatory subunit 1 OS=Homo sapiens GN=PSMD1 PE=1 SV=2 - [PSMD1\_HUMAN]  
 P26006 Integrin alpha-3 OS=Homo sapiens GN=ITGA3 PE=1 SV=5 - [ITA3\_HUMAN]  
 P08670 Vimentin OS=Homo sapiens GN=VIM PE=1 SV=4 - [VIME\_HUMAN]  
 Q16658 Fascin OS=Homo sapiens GN=FSCN1 PE=1 SV=3 - [FSCN1\_HUMAN]  
 P08865 40S ribosomal protein SA OS=Homo sapiens GN=RPSA PE=1 SV=4 - [RSSA\_HUMAN]  
 P06733 Alpha-enolase OS=Homo sapiens GN=ENO1 PE=1 SV=2 - [ENOA\_HUMAN]  
 P63104 14-3-3 protein zeta/delta OS=Homo sapiens GN=YWHAZ PE=1 SV=1 - [1433Z\_HUMAN]  
 P61981 14-3-3 protein gamma OS=Homo sapiens GN=YWHAG PE=1 SV=2 - [1433G\_HUMAN]  
 P17980 26S protease regulatory subunit 6A OS=Homo sapiens GN=PSMC3 PE=1 SV=3 - [PRS6A\_HUMAN]  
 P04083 Annexin A1 OS=Homo sapiens GN=ANXA1 PE=1 SV=2 - [ANXA1\_HUMAN]  
 Q14152 Eukaryotic translation initiation factor 3 subunit A OS=Homo sapiens GN=EIF3A PE=1 SV=1 - [EIF3A\_HUMAN]  
 P48643 T-complex protein 1 subunit epsilon OS=Homo sapiens GN=CCT5 PE=1 SV=1 - [TCPE\_HUMAN]  
 P28066 Proteasome subunit alpha type-5 OS=Homo sapiens GN=PSMA5 PE=1 SV=3 - [PSA5\_HUMAN]  
 Q9Y265 RuvB-like 1 OS=Homo sapiens GN=RUVBL1 PE=1 SV=1 - [RUVB1\_HUMAN]  
 Q8N1N4 Keratin, type II cytoskeletal 78 OS=Homo sapiens GN=KRT78 PE=1 SV=2 - [K2C78\_HUMAN]

O00231 26S proteasome non-ATPase regulatory subunit 11 OS=Homo sapiens GN=PSMD11 PE=1 SV=3 - [PSD11\_HUMAN]  
 Q99436 Proteasome subunit beta type-7 OS=Homo sapiens GN=PSMB7 PE=1 SV=1 - [PSB7\_HUMAN]  
 P07195 L-lactate dehydrogenase B chain OS=Homo sapiens GN=LDHB PE=1 SV=2 - [LDHB\_HUMAN]  
 P55884 Eukaryotic translation initiation factor 3 subunit B OS=Homo sapiens GN=EIF3B PE=1 SV=3 - [EIF3B\_HUMAN]  
 P62249 40S ribosomal protein S16 OS=Homo sapiens GN=RPS16 PE=1 SV=2 - [RS16\_HUMAN]  
 P23526 Adenosylhomocysteinase OS=Homo sapiens GN=AHCY PE=1 SV=4 - [SAHH\_HUMAN]  
 P26641 Elongation factor 1-gamma OS=Homo sapiens GN=EEF1G PE=1 SV=3 - [EF1G\_HUMAN]  
 P28070 Proteasome subunit beta type-4 OS=Homo sapiens GN=PSMB4 PE=1 SV=4 - [PSB4\_HUMAN]  
 P08962 CD63 antigen OS=Homo sapiens GN=CD63 PE=1 SV=2 - [CD63\_HUMAN]  
 P50991 T-complex protein 1 subunit delta OS=Homo sapiens GN=CCT4 PE=1 SV=4 - [TCPD\_HUMAN]  
 P78527 DNA-dependent protein kinase catalytic subunit OS=Homo sapiens GN=PRKDC PE=1 SV=3 - [PRKDC\_HUMAN]  
 P04792 Heat shock protein beta-1 OS=Homo sapiens GN=HSPB1 PE=1 SV=2 - [HSPB1\_HUMAN]  
 P49721 Proteasome subunit beta type-2 OS=Homo sapiens GN=PSMB2 PE=1 SV=1 - [PSB2\_HUMAN]  
 Q14112 Nidogen-2 OS=Homo sapiens GN=NID2 PE=1 SV=3 - [NID2\_HUMAN]  
 P31947 14-3-3 protein sigma OS=Homo sapiens GN=SFN PE=1 SV=1 - [1433S\_HUMAN]  
 P24821 Tenascin OS=Homo sapiens GN=TNC PE=1 SV=3 - [TENA\_HUMAN]  
 Q99613 Eukaryotic translation initiation factor 3 subunit C OS=Homo sapiens GN=EIF3C PE=1 SV=1 - [EIF3C\_HUMAN]  
 P07814 Bifunctional aminoacyl-tRNA synthetase OS=Homo sapiens GN=EPRS PE=1 SV=5 - [SYEP\_HUMAN]  
 P60228 Eukaryotic translation initiation factor 3 subunit E OS=Homo sapiens GN=EIF3E PE=1 SV=1 - [EIF3E\_HUMAN]  
 P41252 Isoleucyl-tRNA synthetase, cytoplasmic OS=Homo sapiens GN=IARS PE=1 SV=2 - [SYIC\_HUMAN]  
 P06744 Glucose-6-phosphate isomerase OS=Homo sapiens GN=GPI PE=1 SV=4 - [G6PI\_HUMAN]  
 P62258 14-3-3 protein epsilon OS=Homo sapiens GN=YWHAE PE=1 SV=1 - [1433E\_HUMAN]  
 P08107 Heat shock 70 kDa protein 1A/1B OS=Homo sapiens GN=HSPA1A PE=1 SV=5 - [HSP71\_HUMAN]  
 P21980 Protein-glutamine gamma-glutamyltransferase 2 OS=Homo sapiens GN=TGM2 PE=1 SV=2 - [TGM2\_HUMAN]  
 P63244 Guanine nucleotide-binding protein subunit beta-2-like 1 OS=Homo sapiens GN=GNB2L1 PE=1 SV=3 - [GBLP\_HUMAN]  
 P12268 Inosine-5'-monophosphate dehydrogenase 2 OS=Homo sapiens GN=IMPDH2 PE=1 SV=2 - [IMDH2\_HUMAN]  
 P15880 40S ribosomal protein S2 OS=Homo sapiens GN=RPS2 PE=1 SV=2 - [RS2\_HUMAN]  
 P14868 Aspartyl-tRNA synthetase, cytoplasmic OS=Homo sapiens GN=DARS PE=1 SV=2 - [SYDC\_HUMAN]  
 P20618 Proteasome subunit beta type-1 OS=Homo sapiens GN=PSMB1 PE=1 SV=2 - [PSB1\_HUMAN]  
 P62241 40S ribosomal protein S8 OS=Homo sapiens GN=RPS8 PE=1 SV=2 - [RS8\_HUMAN]  
 P12109 Collagen alpha-1(VI) chain OS=Homo sapiens GN=COL6A1 PE=1 SV=3 - [CO6A1\_HUMAN]  
 Q15008 26S proteasome non-ATPase regulatory subunit 6 OS=Homo sapiens GN=PSMD6 PE=1 SV=1 - [PSMD6\_HUMAN]  
 Q14CX7 N-alpha-acetyltransferase 25, NatB auxiliary subunit OS=Homo sapiens GN=NAA25 PE=1 SV=1 - [NAA25\_HUMAN]  
 Q01813 6-phosphofructokinase type C OS=Homo sapiens GN=PFKP PE=1 SV=2 - [K6PP\_HUMAN]  
 Q07020 60S ribosomal protein L18 OS=Homo sapiens GN=RPL18 PE=1 SV=2 - [RL18\_HUMAN]  
 P29317 Ephrin type-A receptor 2 OS=Homo sapiens GN=EPHA2 PE=1 SV=2 - [EPHA2\_HUMAN]  
 Q9UNM6 26S proteasome non-ATPase regulatory subunit 13 OS=Homo sapiens GN=PSMD13 PE=1 SV=2 - [PSD13\_HUMAN]  
 P26038 Moesin OS=Homo sapiens GN=MSN PE=1 SV=3 - [MOES\_HUMAN]  
 P16401 Histone H1.5 OS=Homo sapiens GN=HIST1H1B PE=1 SV=3 - [H15\_HUMAN]  
 P25787 Proteasome subunit alpha type-2 OS=Homo sapiens GN=PSMA2 PE=1 SV=2 - [PSA2\_HUMAN]  
 Q13085 Acetyl-CoA carboxylase 1 OS=Homo sapiens GN=ACACA PE=1 SV=2 - [ACACA\_HUMAN]  
 P61247 40S ribosomal protein S3a OS=Homo sapiens GN=RPS3A PE=1 SV=2 - [RS3A\_HUMAN]  
 P28838 Cytosol aminopeptidase OS=Homo sapiens GN=LAP3 PE=1 SV=3 - [AMPL\_HUMAN]  
 P62269 40S ribosomal protein S18 OS=Homo sapiens GN=RPS18 PE=1 SV=3 - [RS18\_HUMAN]  
 P13798 Acylamino-acid-releasing enzyme OS=Homo sapiens GN=APEH PE=1 SV=4 - [ACPH\_HUMAN]  
 Q99715 Collagen alpha-1(XII) chain OS=Homo sapiens GN=COL12A1 PE=1 SV=2 - [COCA1\_HUMAN]  
 P12110 Collagen alpha-2(VI) chain OS=Homo sapiens GN=COL6A2 PE=1 SV=4 - [CO6A2\_HUMAN]  
 O00303 Eukaryotic translation initiation factor 3 subunit F OS=Homo sapiens GN=EIF3F PE=1 SV=1 - [EIF3F\_HUMAN]  
 P51665 26S proteasome non-ATPase regulatory subunit 7 OS=Homo sapiens GN=PSMD7 PE=1 SV=2 - [PSD7\_HUMAN]  
 P41250 Glycyl-tRNA synthetase OS=Homo sapiens GN=GARS PE=1 SV=3 - [SYG\_HUMAN]  
 P26373 60S ribosomal protein L13 OS=Homo sapiens GN=RPL13 PE=1 SV=4 - [RL13\_HUMAN]  
 Q99832 T-complex protein 1 subunit eta OS=Homo sapiens GN=CCT7 PE=1 SV=2 - [TCPH\_HUMAN]  
 Q92616 Translational activator GCN1 OS=Homo sapiens GN=GCN1L1 PE=1 SV=6 - [GCN1L\_HUMAN]  
 P05023 Sodium/potassium-transporting ATPase subunit alpha-1 OS=Homo sapiens GN=ATP1A1 PE=1 SV=1 - [AT1A1\_HUMAN]  
 Q9NQC3 Reticulon-4 OS=Homo sapiens GN=RTN4 PE=1 SV=2 - [RTN4\_HUMAN]  
 Q9Y262 Eukaryotic translation initiation factor 3 subunit L OS=Homo sapiens GN=EIF3L PE=1 SV=1 - [EIF3L\_HUMAN]  
 P11233 Ras-related protein Ral-A OS=Homo sapiens GN=RALA PE=1 SV=1 - [RALA\_HUMAN]  
 O00560 Syntenin-1 OS=Homo sapiens GN=SDCBP PE=1 SV=1 - [SDCB1\_HUMAN]

P15311 Ezrin OS=Homo sapiens GN=EZR PE=1 SV=4 - [EZRI\_HUMAN]  
P20930 Filaggrin OS=Homo sapiens GN=FLG PE=1 SV=3 - [FILA\_HUMAN]  
P00558 Phosphoglycerate kinase 1 OS=Homo sapiens GN=PGK1 PE=1 SV=3 - [PGK1\_HUMAN]  
Q06830 Peroxiredoxin-1 OS=Homo sapiens GN=PRDX1 PE=1 SV=1 - [PRDX1\_HUMAN]  
P19338 Nucleolin OS=Homo sapiens GN=NCL PE=1 SV=3 - [NUCL\_HUMAN]  
P11216 Glycogen phosphorylase, brain form OS=Homo sapiens GN=PYGB PE=1 SV=5 - [PYGB\_HUMAN]  
P62826 GTP-binding nuclear protein Ran OS=Homo sapiens GN=RAN PE=1 SV=3 - [RAN\_HUMAN]  
P29144 Tripeptidyl-peptidase 2 OS=Homo sapiens GN=TPP2 PE=1 SV=4 - [TPP2\_HUMAN]  
P35606 Coatomer subunit beta' OS=Homo sapiens GN=COPB2 PE=1 SV=2 - [COPB2\_HUMAN]  
P13611 Versican core protein OS=Homo sapiens GN=VCAN PE=1 SV=3 - [CSPG2\_HUMAN]  
P02794 Ferritin heavy chain OS=Homo sapiens GN=FTH1 PE=1 SV=2 - [FRIH\_HUMAN]  
Q9Y678 Coatomer subunit gamma OS=Homo sapiens GN=COPG PE=1 SV=1 - [COPG\_HUMAN]  
P35613 Basigin OS=Homo sapiens GN=BSG PE=1 SV=2 - [BASI\_HUMAN]  
P26640 Valyl-tRNA synthetase OS=Homo sapiens GN=VAR5 PE=1 SV=4 - [SYVC\_HUMAN]  
Q63HN8 E3 ubiquitin-protein ligase RNF213 OS=Homo sapiens GN=RNF213 PE=1 SV=3 - [RN213\_HUMAN]  
Q9H190 Syntenin-2 OS=Homo sapiens GN=SDCBP2 PE=2 SV=2 - [SDCB2\_HUMAN]  
P61626 Lysozyme C OS=Homo sapiens GN=LYZ PE=1 SV=1 - [LYSC\_HUMAN]  
P18206 Vinculin OS=Homo sapiens GN=VCL PE=1 SV=4 - [VINC\_HUMAN]  
O15144 Actin-related protein 2/3 complex subunit 2 OS=Homo sapiens GN=ARPC2 PE=1 SV=1 - [ARPC2\_HUMAN]  
P62333 26S protease regulatory subunit 10B OS=Homo sapiens GN=PSMC6 PE=1 SV=1 - [PRS10\_HUMAN]  
P21926 CD9 antigen OS=Homo sapiens GN=CD9 PE=1 SV=4 - [CD9\_HUMAN]  
P16402 Histone H1.3 OS=Homo sapiens GN=HIST1H1D PE=1 SV=2 - [H13\_HUMAN]  
Q16531 DNA damage-binding protein 1 OS=Homo sapiens GN=DDB1 PE=1 SV=1 - [DDB1\_HUMAN]  
P13010 X-ray repair cross-complementing protein 5 OS=Homo sapiens GN=XRCC5 PE=1 SV=3 - [XRCC5\_HUMAN]  
P33176 Kinesin-1 heavy chain OS=Homo sapiens GN=KIF5B PE=1 SV=1 - [KINH\_HUMAN]  
P21589 5'-nucleotidase OS=Homo sapiens GN=NT5E PE=1 SV=1 - [5NTD\_HUMAN]  
P04899 Guanine nucleotide-binding protein G(i) subunit alpha-2 OS=Homo sapiens GN=GNAI2 PE=1 SV=3 - [GNAI2\_HUMAN]  
P43686 26S protease regulatory subunit 6B OS=Homo sapiens GN=PSMC4 PE=1 SV=2 - [PRS6B\_HUMAN]  
Q15758 Neutral amino acid transporter B(0) OS=Homo sapiens GN=SLC1A5 PE=1 SV=2 - [AAAT\_HUMAN]  
P27701 CD82 antigen OS=Homo sapiens GN=CD82 PE=1 SV=1 - [CD82\_HUMAN]  
P11279 Lysosome-associated membrane glycoprotein 1 OS=Homo sapiens GN=LAMP1 PE=1 SV=3 - [LAMP1\_HUMAN]  
P62820 Ras-related protein Rab-1A OS=Homo sapiens GN=RAB1A PE=1 SV=3 - [RAB1A\_HUMAN]  
P46781 40S ribosomal protein S9 OS=Homo sapiens GN=RPS9 PE=1 SV=3 - [RS9\_HUMAN]  
P46777 60S ribosomal protein L5 OS=Homo sapiens GN=RPL5 PE=1 SV=3 - [RL5\_HUMAN]  
P02452 Collagen alpha-1(I) chain OS=Homo sapiens GN=COL1A1 PE=1 SV=5 - [CO1A1\_HUMAN]  
O15372 Eukaryotic translation initiation factor 3 subunit H OS=Homo sapiens GN=EIF3H PE=1 SV=1 - [EIF3H\_HUMAN]  
Q9H4M9 EH domain-containing protein 1 OS=Homo sapiens GN=EHD1 PE=1 SV=2 - [EHD1\_HUMAN]  
P54136 Arginyl-tRNA synthetase, cytoplasmic OS=Homo sapiens GN=RARS PE=1 SV=2 - [SYRC\_HUMAN]  
Q99873 Protein arginine N-methyltransferase 1 OS=Homo sapiens GN=PRMT1 PE=1 SV=2 - [ANM1\_HUMAN]  
O43795 Myosin-Ib OS=Homo sapiens GN=MYO1B PE=1 SV=3 - [MYO1B\_HUMAN]  
O00487 26S proteasome non-ATPase regulatory subunit 14 OS=Homo sapiens GN=PSMD14 PE=1 SV=1 - [PSDE\_HUMAN]  
P61313 60S ribosomal protein L15 OS=Homo sapiens GN=RPL15 PE=1 SV=2 - [RL15\_HUMAN]  
Q8N5I2 Arrestin domain-containing protein 1 OS=Homo sapiens GN=ARRDC1 PE=2 SV=1 - [ARRD1\_HUMAN]  
Q92743 Serine protease HTRA1 OS=Homo sapiens GN=HTRA1 PE=1 SV=1 - [HTRA1\_HUMAN]  
P10909 Clusterin OS=Homo sapiens GN=CLU PE=1 SV=1 - [CLUS\_HUMAN]  
P09525 Annexin A4 OS=Homo sapiens GN=ANXA4 PE=1 SV=4 - [ANXA4\_HUMAN]  
Q9UBC9 Small proline-rich protein 3 OS=Homo sapiens GN=SPRR3 PE=1 SV=2 - [SPRR3\_HUMAN]  
Q14203 Dynactin subunit 1 OS=Homo sapiens GN=DCTN1 PE=1 SV=3 - [DCTN1\_HUMAN]  
P62913 60S ribosomal protein L11 OS=Homo sapiens GN=RPL11 PE=1 SV=2 - [RL11\_HUMAN]  
P47897 Glutamyl-tRNA synthetase OS=Homo sapiens GN=QARS PE=1 SV=1 - [SYQ\_HUMAN]  
P18077 60S ribosomal protein L35a OS=Homo sapiens GN=RPL35A PE=1 SV=2 - [RL35A\_HUMAN]  
O14672 Disintegrin and metalloproteinase domain-containing protein 10 OS=Homo sapiens GN=ADAM10 PE=1 SV=1  
P01876 Ig alpha-1 chain C region OS=Homo sapiens GN=IGHA1 PE=1 SV=2 - [IGHA1\_HUMAN]  
O00299 Chloride intracellular channel protein 1 OS=Homo sapiens GN=CLIC1 PE=1 SV=4 - [CLIC1\_HUMAN]  
P17858 6-phosphofructokinase, liver type OS=Homo sapiens GN=PFKL PE=1 SV=6 - [K6PL\_HUMAN]  
P59998 Actin-related protein 2/3 complex subunit 4 OS=Homo sapiens GN=ARPC4 PE=1 SV=3 - [ARPC4\_HUMAN]  
P06737 Glycogen phosphorylase, liver form OS=Homo sapiens GN=PYGL PE=1 SV=4 - [PYGL\_HUMAN]  
P22392 Nucleoside diphosphate kinase B OS=Homo sapiens GN=NME2 PE=1 SV=1 - [NDKB\_HUMAN]

P06703 Protein S100-A6 OS=Homo sapiens GN=S100A6 PE=1 SV=1 - [S10A6\_HUMAN]  
O75083 WD repeat-containing protein 1 OS=Homo sapiens GN=WDR1 PE=1 SV=4 - [WDR1\_HUMAN]  
Q15286 Ras-related protein Rab-35 OS=Homo sapiens GN=RAB35 PE=1 SV=1 - [RAB35\_HUMAN]  
P61158 Actin-related protein 3 OS=Homo sapiens GN=ACTR3 PE=1 SV=3 - [ARP3\_HUMAN]  
P08133 Annexin A6 OS=Homo sapiens GN=ANXA6 PE=1 SV=3 - [ANXA6\_HUMAN]  
P18621 60S ribosomal protein L17 OS=Homo sapiens GN=RPL17 PE=1 SV=3 - [RL17\_HUMAN]  
P20073 Annexin A7 OS=Homo sapiens GN=ANXA7 PE=1 SV=3 - [ANXA7\_HUMAN]  
P18124 60S ribosomal protein L7 OS=Homo sapiens GN=RPL7 PE=1 SV=1 - [RL7\_HUMAN]  
P53618 Coatamer subunit beta OS=Homo sapiens GN=COPB1 PE=1 SV=3 - [COPB\_HUMAN]  
P06748 Nucleophosmin OS=Homo sapiens GN=NPM1 PE=1 SV=2 - [NPM\_HUMAN]  
P62854 40S ribosomal protein S26 OS=Homo sapiens GN=RPS26 PE=1 SV=3 - [RS26\_HUMAN]  
P84085 ADP-ribosylation factor 5 OS=Homo sapiens GN=ARF5 PE=1 SV=2 - [ARF5\_HUMAN]  
Q15393 Splicing factor 3B subunit 3 OS=Homo sapiens GN=SF3B3 PE=1 SV=4 - [SF3B3\_HUMAN]  
P48556 26S proteasome non-ATPase regulatory subunit 8 OS=Homo sapiens GN=PSMD8 PE=1 SV=2 - [PSMD8\_HUMAN]  
Q8N163 Protein KIAA1967 OS=Homo sapiens GN=KIAA1967 PE=1 SV=2 - [K1967\_HUMAN]  
Q9Y6G9 Cytoplasmic dynein 1 light intermediate chain 1 OS=Homo sapiens GN=DYNC1L1 PE=1 SV=3 - [DC1L1\_HUMAN]  
O14817 Tetraspanin-4 OS=Homo sapiens GN=TSPAN4 PE=1 SV=1 - [TSN4\_HUMAN]  
O15230 Laminin subunit alpha-5 OS=Homo sapiens GN=LAMA5 PE=1 SV=8 - [LAMA5\_HUMAN]  
P61160 Actin-related protein 2 OS=Homo sapiens GN=ACTR2 PE=1 SV=1 - [ARP2\_HUMAN]  
P01024 Complement C3 OS=Homo sapiens GN=C3 PE=1 SV=2 - [CO3\_HUMAN]  
P51149 Ras-related protein Rab-7a OS=Homo sapiens GN=RAB7A PE=1 SV=1 - [RAB7A\_HUMAN]  
P04080 Cystatin-B OS=Homo sapiens GN=CSTB PE=1 SV=2 - [CYTB\_HUMAN]  
P37837 Transaldolase OS=Homo sapiens GN=TALDO1 PE=1 SV=2 - [TALDO\_HUMAN]  
P29401 Transketolase OS=Homo sapiens GN=TKT PE=1 SV=3 - [TKT\_HUMAN]  
Q9UQ80 Proliferation-associated protein 2G4 OS=Homo sapiens GN=PA2G4 PE=1 SV=3 - [PA2G4\_HUMAN]  
P26639 Threonyl-tRNA synthetase, cytoplasmic OS=Homo sapiens GN=TARS PE=1 SV=3 - [SYTC\_HUMAN]  
P36578 60S ribosomal protein L4 OS=Homo sapiens GN=RPL4 PE=1 SV=5 - [RL4\_HUMAN]  
P29966 Myristoylated alanine-rich C-kinase substrate OS=Homo sapiens GN=MARCKS PE=1 SV=4 - [MARCS\_HUMAN]  
P14625 Endoplasmic reticulum protein OS=Homo sapiens GN=HSP90B1 PE=1 SV=1 - [ENPL\_HUMAN]  
P49720 Proteasome subunit beta type-3 OS=Homo sapiens GN=PSMB3 PE=1 SV=2 - [PSB3\_HUMAN]  
P05388 60S acidic ribosomal protein P0 OS=Homo sapiens GN=RPLP0 PE=1 SV=1 - [RLA0\_HUMAN]  
P50995 Annexin A11 OS=Homo sapiens GN=ANXA11 PE=1 SV=1 - [ANX11\_HUMAN]  
P62701 40S ribosomal protein S4, X isoform OS=Homo sapiens GN=RPS4X PE=1 SV=2 - [RS4X\_HUMAN]  
P39023 60S ribosomal protein L3 OS=Homo sapiens GN=RPL3 PE=1 SV=2 - [RL3\_HUMAN]  
P62753 40S ribosomal protein S6 OS=Homo sapiens GN=RPS6 PE=1 SV=1 - [RS6\_HUMAN]  
P09758 Tumor-associated calcium signal transducer 2 OS=Homo sapiens GN=TACSTD2 PE=1 SV=3 - [TACD2\_HUMAN]  
P46779 60S ribosomal protein L28 OS=Homo sapiens GN=RPL28 PE=1 SV=3 - [RL28\_HUMAN]  
P62917 60S ribosomal protein L8 OS=Homo sapiens GN=RPL8 PE=1 SV=2 - [RL8\_HUMAN]  
P62263 40S ribosomal protein S14 OS=Homo sapiens GN=RPS14 PE=1 SV=3 - [RS14\_HUMAN]  
P48444 Coatamer subunit delta OS=Homo sapiens GN=ARCN1 PE=1 SV=1 - [COPD\_HUMAN]  
P62280 40S ribosomal protein S11 OS=Homo sapiens GN=RPS11 PE=1 SV=3 - [RS11\_HUMAN]  
O43760 Synaptogyrin-2 OS=Homo sapiens GN=SYNGR2 PE=1 SV=1 - [SNG2\_HUMAN]  
Q9P2J5 Leucyl-tRNA synthetase, cytoplasmic OS=Homo sapiens GN=LARS PE=1 SV=2 - [SYLC\_HUMAN]  
P51148 Ras-related protein Rab-5C OS=Homo sapiens GN=RAB5C PE=1 SV=2 - [RAB5C\_HUMAN]  
P08648 Integrin alpha-5 OS=Homo sapiens GN=ITGA5 PE=1 SV=2 - [ITA5\_HUMAN]  
Q9H9H4 Vacuolar protein sorting-associated protein 37B OS=Homo sapiens GN=VPS37B PE=1 SV=1 - [VP37B\_HUMAN]  
O15427 Monocarboxylate transporter 4 OS=Homo sapiens GN=SLC16A3 PE=1 SV=1 - [MOT4\_HUMAN]  
P98160 Basement membrane-specific heparan sulfate proteoglycan core protein OS=Homo sapiens GN=HSPG2 PE=1 SV=4  
O60437 Periplakin OS=Homo sapiens GN=PPL PE=1 SV=4 - [PEPL\_HUMAN]  
P10599 Thioredoxin OS=Homo sapiens GN=TXN PE=1 SV=3 - [THIO\_HUMAN]  
P07910 Heterogeneous nuclear ribonucleoproteins C1/C2 OS=Homo sapiens GN=HNRNPC PE=1 SV=4 - [HNRPC\_HUMAN]  
P61224 Ras-related protein Rap-1b OS=Homo sapiens GN=RAP1B PE=1 SV=1 - [RAP1B\_HUMAN]  
Q9Y285 Phenylalanyl-tRNA synthetase alpha chain OS=Homo sapiens GN=FRS3 PE=1 SV=3 - [SYFA\_HUMAN]  
P15259 Phosphoglycerate mutase 2 OS=Homo sapiens GN=PGAM2 PE=1 SV=3 - [PGAM2\_HUMAN]  
P08758 Annexin A5 OS=Homo sapiens GN=ANXA5 PE=1 SV=2 - [ANXA5\_HUMAN]  
Q9ULV4 Coronin-1C OS=Homo sapiens GN=CORO1C PE=1 SV=1 - [COR1C\_HUMAN]  
P01033 Metalloproteinase inhibitor 1 OS=Homo sapiens GN=TIMP1 PE=1 SV=1 - [TIMP1\_HUMAN]  
P15559 NAD(P)H dehydrogenase [quinone] 1 OS=Homo sapiens GN=NQO1 PE=1 SV=1 - [NQO1\_HUMAN]

P16070 CD44 antigen OS=Homo sapiens GN=CD44 PE=1 SV=3 - [CD44\_HUMAN]  
P62277 40S ribosomal protein S13 OS=Homo sapiens GN=RPS13 PE=1 SV=2 - [RS13\_HUMAN]  
P62244 40S ribosomal protein S15a OS=Homo sapiens GN=RPS15A PE=1 SV=2 - [RS15A\_HUMAN]  
Q15907 Ras-related protein Rab-11B OS=Homo sapiens GN=RAB11B PE=1 SV=4 - [RB11B\_HUMAN]  
O95782 AP-2 complex subunit alpha-1 OS=Homo sapiens GN=AP2A1 PE=1 SV=3 - [AP2A1\_HUMAN]  
O15523 ATP-dependent RNA helicase DDX3Y OS=Homo sapiens GN=DDX3Y PE=1 SV=2 - [DDX3Y\_HUMAN]  
Q08431 Lactadherin OS=Homo sapiens GN=MFGE8 PE=1 SV=2 - [MFGM\_HUMAN]  
Q9P265 Disco-interacting protein 2 homolog B OS=Homo sapiens GN=DIP2B PE=1 SV=3 - [DIP2B\_HUMAN]  
Q9H2H9 Sodium-coupled neutral amino acid transporter 1 OS=Homo sapiens GN=SLC38A1 PE=1 SV=1 - [S38A1\_HUMAN]  
Q9BXJ9 N-alpha-acetyltransferase 15, NatA auxiliary subunit OS=Homo sapiens GN=NAA15 PE=1 SV=1 - [NAA15\_HUMAN]  
Q9ULA0 Aspartyl aminopeptidase OS=Homo sapiens GN=DNPEP PE=1 SV=1 - [DNPEP\_HUMAN]  
Q13347 Eukaryotic translation initiation factor 3 subunit I OS=Homo sapiens GN=EIF3I PE=1 SV=1 - [EIF3I\_HUMAN]  
Q99816 Tumor susceptibility gene 101 protein OS=Homo sapiens GN=TSG101 PE=1 SV=2 - [TS101\_HUMAN]  
P28062 Proteasome subunit beta type-8 OS=Homo sapiens GN=PSMB8 PE=1 SV=3 - [PSB8\_HUMAN]  
P01833 Polymeric immunoglobulin receptor OS=Homo sapiens GN=PIGR PE=1 SV=4 - [PIGR\_HUMAN]  
Q96DA0 Zymogen granule protein 16 homolog B OS=Homo sapiens GN=ZG16B PE=1 SV=3 - [ZG16B\_HUMAN]  
Q9HC84 Mucin-5B OS=Homo sapiens GN=MUC5B PE=1 SV=3 - [MUC5B\_HUMAN]  
P08311 Cathepsin G OS=Homo sapiens GN=CTSG PE=1 SV=2 - [CATG\_HUMAN]  
P29034 Protein S100-A2 OS=Homo sapiens GN=S100A2 PE=1 SV=3 - [S10A2\_HUMAN]  
P07237 Protein disulfide-isomerase OS=Homo sapiens GN=P4HB PE=1 SV=3 - [PDIA1\_HUMAN]  
P46940 Ras GTPase-activating-like protein IQGAP1 OS=Homo sapiens GN=IQGAP1 PE=1 SV=1 - [IQGA1\_HUMAN]  
P62873 Guanine nucleotide-binding protein G(I)/G(S)/G(T) subunit beta-1 OS=Homo sapiens GN=GNB1 PE=1 SV=3  
P50552 Vasodilator-stimulated phosphoprotein OS=Homo sapiens GN=VASP PE=1 SV=3 - [VASP\_HUMAN]  
P63151 Serine/threonine-protein phosphatase 2A 55 kDa regulatory subunit B alpha isoform OS=Homo sapiens GN=PPP2R2A PE=1  
Q08188 Protein-glutamine gamma-glutamyltransferase E OS=Homo sapiens GN=TGM3 PE=1 SV=4 - [TGM3\_HUMAN]  
P52907 F-actin-capping protein subunit alpha-1 OS=Homo sapiens GN=CAPZA1 PE=1 SV=3 - [CAZA1\_HUMAN]  
Q7KZF4 Staphylococcal nuclease domain-containing protein 1 OS=Homo sapiens GN=SND1 PE=1 SV=1 - [SND1\_HUMAN]  
P22735 Protein-glutamine gamma-glutamyltransferase K OS=Homo sapiens GN=TGM1 PE=1 SV=4 - [TGM1\_HUMAN]  
Q08211 ATP-dependent RNA helicase A OS=Homo sapiens GN=DHX9 PE=1 SV=4 - [DHX9\_HUMAN]  
Q5VYK3 Proteasome-associated protein ECM29 homolog OS=Homo sapiens GN=ECM29 PE=1 SV=2 - [ECM29\_HUMAN]  
P40429 60S ribosomal protein L13a OS=Homo sapiens GN=RPL13A PE=1 SV=2 - [RL13A\_HUMAN]  
P28065 Proteasome subunit beta type-9 OS=Homo sapiens GN=PSMB9 PE=1 SV=2 - [PSB9\_HUMAN]  
Q81Z83 Aldehyde dehydrogenase family 16 member A1 OS=Homo sapiens GN=ALDH16A1 PE=1 SV=2 - [A16A1\_HUMAN]  
O60884 DnaJ homolog subfamily A member 2 OS=Homo sapiens GN=DNAJA2 PE=1 SV=1 - [DNJA2\_HUMAN]  
P62266 40S ribosomal protein S23 OS=Homo sapiens GN=RPS23 PE=1 SV=3 - [RS23\_HUMAN]  
P14324 Farnesyl pyrophosphate synthase OS=Homo sapiens GN=FDPS PE=1 SV=4 - [FPSP\_HUMAN]  
O43684 Mitotic checkpoint protein BUB3 OS=Homo sapiens GN=BUB3 PE=1 SV=1 - [BUB3\_HUMAN]  
Q00765 Receptor expression-enhancing protein 5 OS=Homo sapiens GN=REEP5 PE=1 SV=3 - [REEP5\_HUMAN]  
P13807 Glycogen [starch] synthase, muscle OS=Homo sapiens GN=GYS1 PE=1 SV=2 - [GYS1\_HUMAN]  
P31431 Syndecan-4 OS=Homo sapiens GN=SDC4 PE=1 SV=2 - [SDC4\_HUMAN]  
P31939 Bifunctional purine biosynthesis protein PURH OS=Homo sapiens GN=ATIC PE=1 SV=3 - [PUR9\_HUMAN]  
Q92900 Regulator of nonsense transcripts 1 OS=Homo sapiens GN=UPF1 PE=1 SV=2 - [RENT1\_HUMAN]  
O94915 Protein furry homolog-like OS=Homo sapiens GN=FRYL PE=1 SV=2 - [FRYL\_HUMAN]  
P60660 Myosin light polypeptide 6 OS=Homo sapiens GN=MYL6 PE=1 SV=2 - [MYL6\_HUMAN]  
P22314 Ubiquitin-like modifier-activating enzyme 1 OS=Homo sapiens GN=UBA1 PE=1 SV=3 - [UBA1\_HUMAN]  
P12429 Annexin A3 OS=Homo sapiens GN=ANXA3 PE=1 SV=3 - [ANXA3\_HUMAN]  
Q9Y490 Talin-1 OS=Homo sapiens GN=TLN1 PE=1 SV=3 - [TLN1\_HUMAN]  
Q9NZM1 Myoferlin OS=Homo sapiens GN=MYOF PE=1 SV=1 - [MYOF\_HUMAN]  
O60701 UDP-glucose 6-dehydrogenase OS=Homo sapiens GN=UGDH PE=1 SV=1 - [UGDH\_HUMAN]  
Q8IUR7 Armadillo repeat-containing protein 8 OS=Homo sapiens GN=ARMC8 PE=1 SV=2 - [ARMC8\_HUMAN]  
P14923 Junction plakoglobin OS=Homo sapiens GN=JUP PE=1 SV=3 - [PLAK\_HUMAN]  
O75643 U5 small nuclear ribonucleoprotein 200 kDa helicase OS=Homo sapiens GN=SNRNP200 PE=1 SV=2 - [U520\_HUMAN]  
O00160 Myosin-Ib OS=Homo sapiens GN=MYO1F PE=1 SV=3 - [MYO1F\_HUMAN]  
Q9P0M6 Core histone macro-H2A.2 OS=Homo sapiens GN=H2AFY2 PE=1 SV=3 - [H2AW\_HUMAN]  
Q00341 Vigilin OS=Homo sapiens GN=HDLBP PE=1 SV=2 - [VIGLN\_HUMAN]  
Q9BT78 COP9 signalosome complex subunit 4 OS=Homo sapiens GN=COPS4 PE=1 SV=1 - [CSN4\_HUMAN]  
P08123 Collagen alpha-2(I) chain OS=Homo sapiens GN=COL1A2 PE=1 SV=7 - [CO1A2\_HUMAN]  
P11586 C-1-tetrahydrofolate synthase, cytoplasmic OS=Homo sapiens GN=MTHFD1 PE=1 SV=3 - [C1TC\_HUMAN]

Q13561 Dynactin subunit 2 OS=Homo sapiens GN=DCTN2 PE=1 SV=4 - [DCTN2\_HUMAN]  
 Q9UMS4 Pre-mRNA-processing factor 19 OS=Homo sapiens GN=PRPF19 PE=1 SV=1 - [PRP19\_HUMAN]  
 P30050 60S ribosomal protein L12 OS=Homo sapiens GN=RPL12 PE=1 SV=1 - [RL12\_HUMAN]  
 Q02543 60S ribosomal protein L18a OS=Homo sapiens GN=RPL18A PE=1 SV=2 - [RL18A\_HUMAN]  
 P38606 V-type proton ATPase catalytic subunit A OS=Homo sapiens GN=ATP6V1A PE=1 SV=2 - [VATA\_HUMAN]  
 P62829 60S ribosomal protein L23 OS=Homo sapiens GN=RPL23 PE=1 SV=1 - [RL23\_HUMAN]  
 P06756 Integrin alpha-V OS=Homo sapiens GN=ITGAV PE=1 SV=2 - [ITAV\_HUMAN]  
 Q9UBI6 Guanine nucleotide-binding protein G(I)/G(S)/G(O) subunit gamma-12 OS=Homo sapiens GN=GNG12 PE=1 SV=3  
 P61353 60S ribosomal protein L27 OS=Homo sapiens GN=RPL27 PE=1 SV=2 - [RL27\_HUMAN]  
 P49755 Transmembrane emp24 domain-containing protein 10 OS=Homo sapiens GN=TMED10 PE=1 SV=2 - [TMEDA\_HUMAN]  
 P41091 Eukaryotic translation initiation factor 2 subunit 3 OS=Homo sapiens GN=EIF2S3 PE=1 SV=3 - [IF2G\_HUMAN]  
 Q9Y3I0 UPF0027 protein C22orf28 OS=Homo sapiens GN=C22orf28 PE=1 SV=1 - [CV028\_HUMAN]  
 Q13740 CD166 antigen OS=Homo sapiens GN=ALCAM PE=1 SV=2 - [CD166\_HUMAN]  
 Q96FQ6 Protein S100-A16 OS=Homo sapiens GN=S100A16 PE=1 SV=1 - [S10AG\_HUMAN]  
 Q14108 Lysosome membrane protein 2 OS=Homo sapiens GN=SCARB2 PE=1 SV=2 - [SCR2\_HUMAN]  
 Q13148 TAR DNA-binding protein 43 OS=Homo sapiens GN=TARDBP PE=1 SV=1 - [TADBP\_HUMAN]  
 P61163 Alpha-centractin OS=Homo sapiens GN=ACTR1A PE=1 SV=1 - [ACTZ\_HUMAN]  
 P02686 Myelin basic protein OS=Homo sapiens GN=MBP PE=1 SV=3 - [MBP\_HUMAN]  
 O43747 AP-1 complex subunit gamma-1 OS=Homo sapiens GN=AP1G1 PE=1 SV=5 - [AP1G1\_HUMAN]  
 Q13557 Calcium/calmodulin-dependent protein kinase type II subunit delta OS=Homo sapiens GN=CAMK2D PE=1 SV=3  
 Q9BV40 Vesicle-associated membrane protein 8 OS=Homo sapiens GN=VAMP8 PE=1 SV=1 - [VAMP8\_HUMAN]  
 P19623 Spermidine synthase OS=Homo sapiens GN=SRM PE=1 SV=1 - [SPEE\_HUMAN]  
 Q7L2H7 Eukaryotic translation initiation factor 3 subunit M OS=Homo sapiens GN=EIF3M PE=1 SV=1 - [EIF3M\_HUMAN]  
 P38919 Eukaryotic initiation factor 4A-III OS=Homo sapiens GN=EIF4A3 PE=1 SV=4 - [IF4A3\_HUMAN]  
 P31689 DnaJ homolog subfamily A member 1 OS=Homo sapiens GN=DNAJA1 PE=1 SV=2 - [DNJA1\_HUMAN]  
 P08243 Asparagine synthetase [glutamine-hydrolyzing] OS=Homo sapiens GN=ASNS PE=1 SV=4 - [ASNS\_HUMAN]  
 Q92878 DNA repair protein RAD50 OS=Homo sapiens GN=RAD50 PE=1 SV=1 - [RAD50\_HUMAN]  
 O95347 Structural maintenance of chromosomes protein 2 OS=Homo sapiens GN=SMC2 PE=1 SV=2 - [SMC2\_HUMAN]  
 O14744 Protein arginine N-methyltransferase 5 OS=Homo sapiens GN=PRMT5 PE=1 SV=4 - [ANM5\_HUMAN]  
 Q9Y315 Putative deoxyribose-phosphate aldolase OS=Homo sapiens GN=DERA PE=1 SV=2 - [DEOC\_HUMAN]  
 Q92466 DNA damage-binding protein 2 OS=Homo sapiens GN=DDB2 PE=1 SV=1 - [DDB2\_HUMAN]  
 P17812 CTP synthase 1 OS=Homo sapiens GN=CTPS PE=1 SV=2 - [PYRG1\_HUMAN]  
 Q9H5V8 CUB domain-containing protein 1 OS=Homo sapiens GN=CDCP1 PE=1 SV=3 - [CDCP1\_HUMAN]  
 P35052 Glypican-1 OS=Homo sapiens GN=GPC1 PE=1 SV=2 - [GPC1\_HUMAN]  
 P06493 Cyclin-dependent kinase 1 OS=Homo sapiens GN=CDK1 PE=1 SV=3 - [CDK1\_HUMAN]  
 P02768 Serum albumin OS=Homo sapiens GN=ALB PE=1 SV=2 - [ALBU\_HUMAN]  
 P62714 Serine/threonine-protein phosphatase 2A catalytic subunit beta isoform OS=Homo sapiens GN=PPP2CB PE=1 SV=1  
 O75153 Protein KIAA0664 OS=Homo sapiens GN=KIAA0664 PE=1 SV=2 - [K0664\_HUMAN]  
 P29508 Serpin B3 OS=Homo sapiens GN=SERPIN3 PE=1 SV=2 - [SPB3\_HUMAN]  
 P05109 Protein S100-A8 OS=Homo sapiens GN=S100A8 PE=1 SV=1 - [S10A8\_HUMAN]  
 P00491 Purine nucleoside phosphorylase OS=Homo sapiens GN=PNP PE=1 SV=2 - [PNPH\_HUMAN]  
 O75874 Isocitrate dehydrogenase [NADP] cytoplasmic OS=Homo sapiens GN=IDH1 PE=1 SV=2 - [IDHC\_HUMAN]  
 P15121 Aldose reductase OS=Homo sapiens GN=AKR1B1 PE=1 SV=3 - [ALDR\_HUMAN]  
 Q14974 Importin subunit beta-1 OS=Homo sapiens GN=KPNB1 PE=1 SV=2 - [IMB1\_HUMAN]  
 Q9UBG3 Cornulin OS=Homo sapiens GN=CRNN PE=1 SV=1 - [CRNN\_HUMAN]  
 P13489 Ribonuclease inhibitor OS=Homo sapiens GN=RNH1 PE=1 SV=2 - [RINI\_HUMAN]  
 P07476 Involucrin OS=Homo sapiens GN=IVL PE=1 SV=2 - [INVO\_HUMAN]  
 P80723 Brain acid soluble protein 1 OS=Homo sapiens GN=BASP1 PE=1 SV=2 - [BASP1\_HUMAN]  
 P37802 Transgelin-2 OS=Homo sapiens GN=TAGLN2 PE=1 SV=3 - [TAGL2\_HUMAN]  
 Q13867 Bleomycin hydrolase OS=Homo sapiens GN=BLMH PE=1 SV=1 - [BLMH\_HUMAN]  
 Q9UJ70 N-acetyl-D-glucosamine kinase OS=Homo sapiens GN=NAGK PE=1 SV=4 - [NAGK\_HUMAN]  
 P02786 Transferrin receptor protein 1 OS=Homo sapiens GN=TFRC PE=1 SV=2 - [TFR1\_HUMAN]  
 P07384 Calpain-1 catalytic subunit OS=Homo sapiens GN=CAPN1 PE=1 SV=1 - [CAN1\_HUMAN]  
 O15143 Actin-related protein 2/3 complex subunit 1B OS=Homo sapiens GN=ARPC1B PE=1 SV=3 - [ARC1B\_HUMAN]  
 P46782 40S ribosomal protein S5 OS=Homo sapiens GN=RPS5 PE=1 SV=4 - [RS5\_HUMAN]  
 Q96QK1 Vacuolar protein sorting-associated protein 35 OS=Homo sapiens GN=VPS35 PE=1 SV=2 - [VPS35\_HUMAN]  
 P10768 S-formylglutathione hydrolase OS=Homo sapiens GN=ESD PE=1 SV=2 - [ESTD\_HUMAN]  
 P63167 Dynein light chain 1, cytoplasmic OS=Homo sapiens GN=DYNLL1 PE=1 SV=1 - [DYL1\_HUMAN]

P34932 Heat shock 70 kDa protein 4 OS=Homo sapiens GN=HSPA4 PE=1 SV=4 - [HSP74\_HUMAN]  
P05198 Eukaryotic translation initiation factor 2 subunit 1 OS=Homo sapiens GN=EIF2S1 PE=1 SV=3 - [IF2A\_HUMAN]  
Q9NZN4 EH domain-containing protein 2 OS=Homo sapiens GN=EHD2 PE=1 SV=2 - [EHD2\_HUMAN]  
Q9NTJ3 Structural maintenance of chromosomes protein 4 OS=Homo sapiens GN=SMC4 PE=1 SV=2 - [SMC4\_HUMAN]  
P02461 Collagen alpha-1(III) chain OS=Homo sapiens GN=COL3A1 PE=1 SV=4 - [CO3A1\_HUMAN]  
O43175 D-3-phosphoglycerate dehydrogenase OS=Homo sapiens GN=PHGDH PE=1 SV=4 - [SERA\_HUMAN]  
Q9Y624 Junctional adhesion molecule A OS=Homo sapiens GN=F11R PE=1 SV=1 - [JAM1\_HUMAN]  
O00148 ATP-dependent RNA helicase DDX39 OS=Homo sapiens GN=DDX39 PE=1 SV=2 - [DDX39\_HUMAN]  
P61201 COP9 signalosome complex subunit 2 OS=Homo sapiens GN=COPS2 PE=1 SV=1 - [CSN2\_HUMAN]  
Q9H444 Charged multivesicular body protein 4b OS=Homo sapiens GN=CHMP4B PE=1 SV=1 - [CHM4B\_HUMAN]  
P50454 Serpin H1 OS=Homo sapiens GN=SERPINH1 PE=1 SV=2 - [SERPH\_HUMAN]  
P13861 cAMP-dependent protein kinase type II-alpha regulatory subunit OS=Homo sapiens GN=PRKAR2A PE=1 SV=2  
P19367 Hexokinase-1 OS=Homo sapiens GN=HK1 PE=1 SV=3 - [HXK1\_HUMAN]  
P51572 B-cell receptor-associated protein 31 OS=Homo sapiens GN=BCAP31 PE=1 SV=3 - [BAP31\_HUMAN]  
P53680 AP-2 complex subunit sigma OS=Homo sapiens GN=AP2S1 PE=1 SV=2 - [AP2S1\_HUMAN]  
P55786 Puromycin-sensitive aminopeptidase OS=Homo sapiens GN=NPEPPS PE=1 SV=2 - [PSA\_HUMAN]  
Q5VW38 Protein GPR107 OS=Homo sapiens GN=GPR107 PE=2 SV=1 - [GP107\_HUMAN]  
O95373 Importin-7 OS=Homo sapiens GN=IPO7 PE=1 SV=1 - [IPO7\_HUMAN]  
Q7Z5G4 Golgin subfamily A member 7 OS=Homo sapiens GN=GOLGA7 PE=1 SV=2 - [GOGA7\_HUMAN]  
P56192 Methionyl-tRNA synthetase, cytoplasmic OS=Homo sapiens GN=MARS PE=1 SV=2 - [SYMC\_HUMAN]  
O75533 Splicing factor 3B subunit 1 OS=Homo sapiens GN=SF3B1 PE=1 SV=3 - [SF3B1\_HUMAN]  
Q9UNS2 COP9 signalosome complex subunit 3 OS=Homo sapiens GN=COPS3 PE=1 SV=3 - [CSN3\_HUMAN]  
Q01650 Large neutral amino acids transporter small subunit 1 OS=Homo sapiens GN=SLC7A5 PE=1 SV=2 - [LAT1\_HUMAN]  
Q9Y5P6 Mannose-1-phosphate guanyltransferase beta OS=Homo sapiens GN=GMPPB PE=1 SV=2 - [GMPPB\_HUMAN]  
Q9UHB9 Signal recognition particle 68 kDa protein OS=Homo sapiens GN=SRP68 PE=1 SV=2 - [SRP68\_HUMAN]  
Q96IJ6 Mannose-1-phosphate guanyltransferase alpha OS=Homo sapiens GN=GMPPA PE=1 SV=1 - [GMPPA\_HUMAN]  
P30566 Adenylosuccinate lyase OS=Homo sapiens GN=ADSL PE=1 SV=2 - [PUR8\_HUMAN]  
Q00577 Transcriptional activator protein Pur-alpha OS=Homo sapiens GN=PURA PE=1 SV=2 - [PURA\_HUMAN]  
Q9UBV8 Peflin OS=Homo sapiens GN=PEF1 PE=1 SV=1 - [PEF1\_HUMAN]  
P11387 DNA topoisomerase 1 OS=Homo sapiens GN=TOP1 PE=1 SV=2 - [TOP1\_HUMAN]  
Q96CW1 AP-2 complex subunit mu OS=Homo sapiens GN=AP2M1 PE=1 SV=2 - [AP2M1\_HUMAN]  
P11940 Polyadenylate-binding protein 1 OS=Homo sapiens GN=PABPC1 PE=1 SV=2 - [PABP1\_HUMAN]  
P22234 Multifunctional protein ADE2 OS=Homo sapiens GN=PAICS PE=1 SV=3 - [PUR6\_HUMAN]  
P37268 Squalene synthase OS=Homo sapiens GN=FDFT1 PE=1 SV=1 - [FDFT\_HUMAN]  
Q13835 Plakophilin-1 OS=Homo sapiens GN=PKP1 PE=1 SV=2 - [PKP1\_HUMAN]  
P48163 NADP-dependent malic enzyme OS=Homo sapiens GN=ME1 PE=1 SV=1 - [MAOX\_HUMAN]  
P23921 Ribonucleoside-diphosphate reductase large subunit OS=Homo sapiens GN=RRM1 PE=1 SV=1 - [RIR1\_HUMAN]  
Q15428 Splicing factor 3A subunit 2 OS=Homo sapiens GN=SF3A2 PE=1 SV=2 - [SF3A2\_HUMAN]  
Q9NT68 Teneurin-2 OS=Homo sapiens GN=ODZ2 PE=1 SV=3 - [TEN2\_HUMAN]  
Q6ZQQ2 Protein FAM75D1 OS=Homo sapiens GN=FAM75D1 PE=1 SV=1 - [F75D1\_HUMAN]  
Q8TDX7 Serine/threonine-protein kinase Nek7 OS=Homo sapiens GN=NEK7 PE=1 SV=1 - [NEK7\_HUMAN]  
Q93008 Probable ubiquitin carboxyl-terminal hydrolase FAF-X OS=Homo sapiens GN=USP9X PE=1 SV=3 - [USP9X\_HUMAN]  
Q14517 Protocadherin Fat 1 OS=Homo sapiens GN=FAT1 PE=1 SV=2 - [FAT1\_HUMAN]  
Q96TA1 Niban-like protein 1 OS=Homo sapiens GN=FAM129B PE=1 SV=3 - [NIBL1\_HUMAN]
